# Supplementary material for: Coalescence of bacterial groups originating from urban runoffs and artificial infiltration systems among aquifer microbiomes
Source: Copernicus journal article supplement (doi:10.5194/hess-24-4257-2020), 2020-08-31
Supplement: Supplementary file 1 [file hess-24-4257-2020-supplement.zip]

Archive with 3 entries (3 files):
- Colin et al R2 hess-2020-39 Suppl_Tables v3.xlsx
- Colin et al R2 hess-2020-39 Suppl_Figures v4.docx
- hess-24-4257-2020-supplement-title-page.pdf
