# Supplementary material for: Coalescence of bacterial groups originating from urban runoffs and artificial infiltration systems among aquifer microbiomes
Source: Copernicus journal article supplement (doi:10.5194/hess-24-4257-2020), 2020-08-31
Supplement: Supplementary file 1 [file hess-24-4257-2020-supplement.zip › Colin et al R2 hess-2020-39 Suppl_Figures v4.docx]

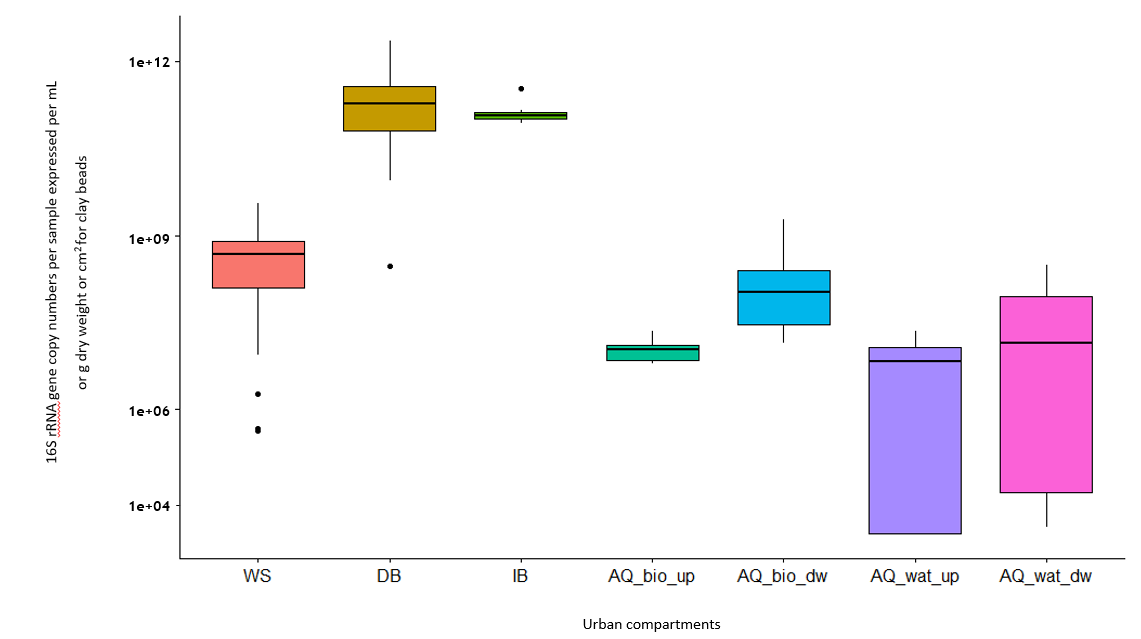


**Figure S1. Boxplot representation of the 16S rRNA gene copy numbers measured by quantitative PCR per DNA extracts of runoff waters (WS), sediments from the detention basin (DB), soils from the infiltration basin (IB), aquifer waters (AQ_waters) or aquifer clay beads biofilms (AQ_bio).** Values were expressed per g of dry weight soil or sediment, or per mL, or per surface (cm2) for the clay bead biofilms.


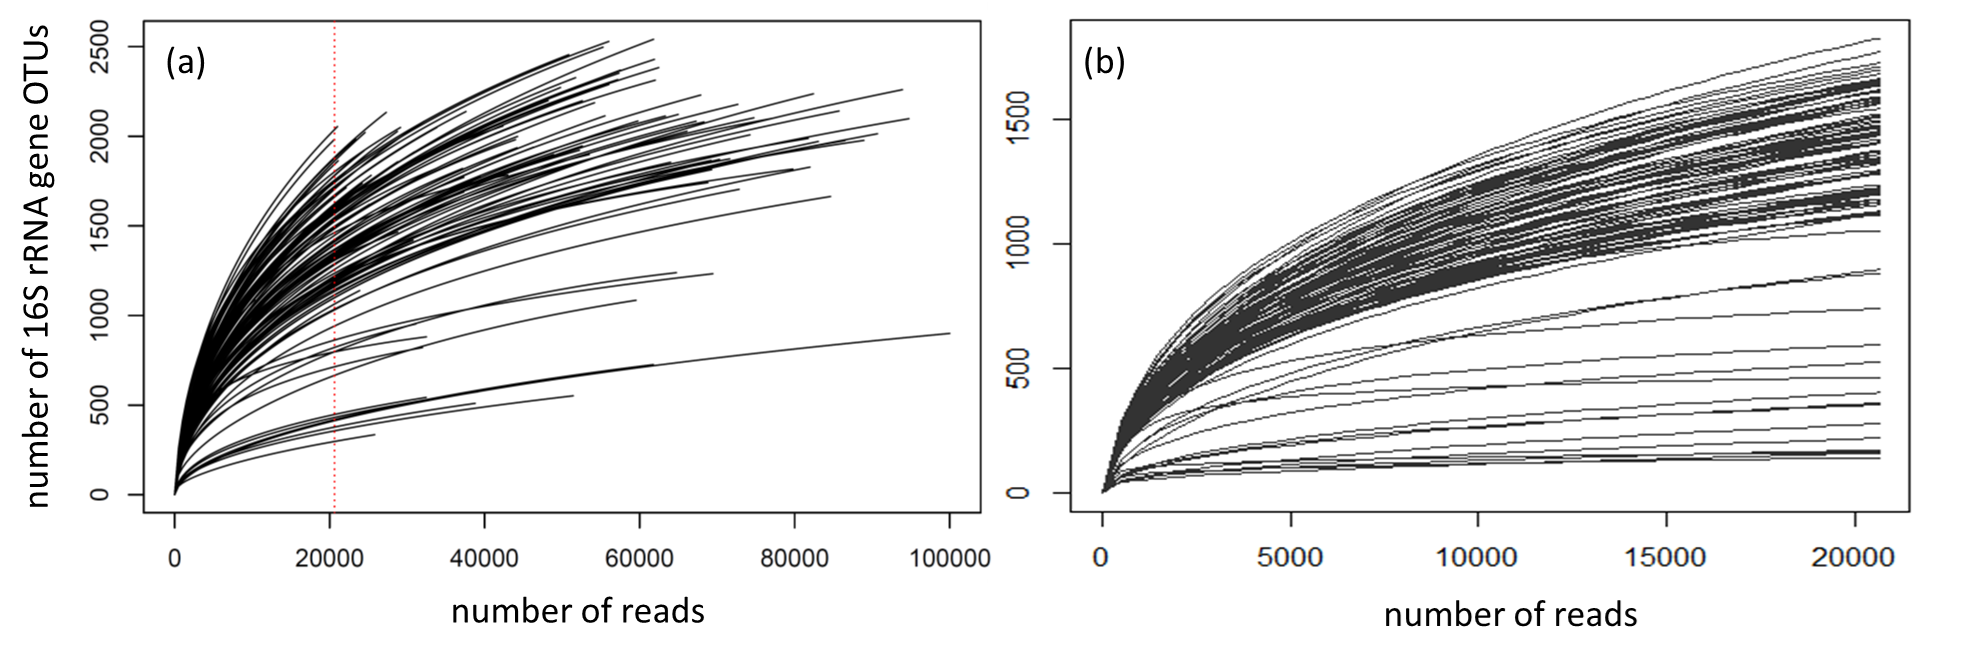
**Figure S2. Rarefaction curves showing the relation between the number of V5-V6 16S rRNA (*rrs*) gene reads analyzed and OTU numbers per compartment of the Mi-plaine watershed of Chassieu (France).** (a) without sub-sampling and (b) with a sub-sampling performed at 20,624 reads per sample.

**
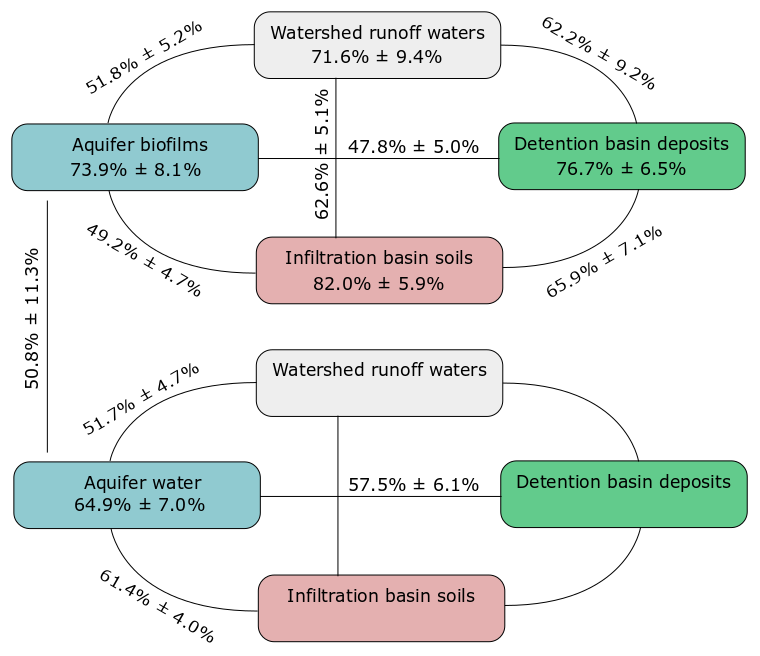
**

**Figure S3. Averaged weighted UniFrac similarities between V5-V6 16S rRNA (*rrs*) OTU profiles grouped according to their origin.**


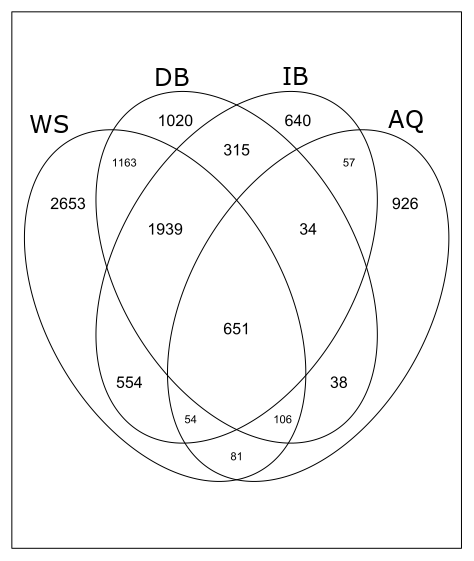


**Figure S4. Venn diagram showing the distribution of V5-V6 16S rRNA (*rrs*) OTUs between runoff waters of the Mi-plaine watershed, urban sediments from the detention basin, and soils of the infiltration basin, and from the connected aquifer (waters and biofilms).** WS: runoff waters from the watershed; DB: sediments from the detention basin; IB: sediments from the infiltration basin; AQ: Aquifer waters and biofilms.
