# Supplementary material for: Coalescence of bacterial groups originating from urban runoffs and artificial infiltration systems among aquifer microbiomes
Source: Copernicus journal article supplement (doi:10.5194/hess-24-4257-2020), 2020-08-31
Supplement: Supplementary file 1 [file hess-24-4257-2020-supplement.zip › Colin et al R2 hess-2020-39 Suppl_Tables v3.xlsx]

## Sheet: Table S1
Table.S1 General features of the watershed, stormwater infiltration system (SIS) and aquifer samples used in this study.
sample ID	Description
DB sites P1, P2, P4, P7 (n=20)	sediment deposits from the detention basin (DB); 16S rRNA gene reads were obtained from Marti et al. (2017)*; tpm reads were generated in this work from DNA extracts used to previously generate the 16S rRNA gene dataset
WS1_october 2014 (n=22); WS2_march 2015 (n=21); WS3_september 2015 (n=21)	runoff waters from the Mi-plaine watershed (WS); 16S rRNA gene and tpm reads were generated in this work
AQ-biofilm_UpSIS and AQ-biofilm_DownSIS (n=6)	aquifer (AQ) biofilm samples collected upstream and downstream the stormwater infiltration system; 16S rRNA gene reads were obtained from Voisin et al. (2018); tpm reads were generated in this work from DNA extracts used to previously generate the 16S rRNA gene dataset
AQ-water_UpSIS and AQ-water_DownSIS (n=6)	aquifer (AQ) water samples collected upstream and downstream the stormwater infiltration system; 16S rRNA gene reads were obtained from Voisin et al. (2018)*; tpm reads were generated in this work from DNA extracts used to previously generate the 16S rRNA gene dataset
IB november 2015 (n=15)	soil samples (0-10 cm depth) from the infiltration basin at the entry point of the inflow waters, at the lowest part of the basin, and from an upper zone under water during high rain events ; 16S rRNA gene and tpm reads were generated in this work
* Marti et al. 2017. https://doi.org/10.1038/s41598-017-13594-8; Voisin et al. 2018. https://doi.org/10.1016/j.scitotenv.2018.05.094

## Sheet: Table S2
Table S2. General features of the 16S rRNA and tpm genes meta-barcoding datasets per environmental sample used in this investigation according to Table S1, and their matching 16S rRNA gene copy numbers per g dry weight of soil or sediment, or per ml or cm2 of clay beads.
				16S rRNA gene copies per g or ml or cm2		raw 16S rRNA gene reads				cleaned 16S rRNA gene reads*	raw tpm gene reads	cleaned tpm gene reads**
						total	length			total	total	total
watershed compartment	description	sampling date	sample ID	mean	standard deviation	number	min	max	mean	number	number	number
WS	Runoff waters from Mi-plaine watershed	october 2014	C1_1_2014o	3.27844e+08	9.40403e+06	40927	38	515	417.303	10372	28441	16347
			C1_2_2014o	3.42587e+07	917987	147926	38	530	416.596	33655	31450	16351
			C1_3_2014o	1.33457e+09	1.5125e+07	144070	37	564	416.31	31979	21627	11945
			C1_5_2014o	1.7349e+07	3.34153e+06	164997	38	551	416.487	40110	18394	8913
			C1_6_2014o	9.89952e+08	4.87825e+07	31933	38	510	416.184	9574	18273	6923
			C1_7_2014o	7.49431e+07	7.88483e+06	182059	37	512	417.024	44190	26650	13060
			C1_8_2014o	not available		201635	38	556	416.037	44238	13501	2688
			C1_9_2014o	not available		176833	38	556	416.687	37588	28330	15650
			C1_10_2014o	5.22339e+07	0	153508	35	564	416.873	37307	41840	20887
			C1_11_2014o	8.43982e+06	0	159422	37	507	416.355	37141	40421	20800
			C1_13_2014o	not available		152100	38	507	416.604	36975	10437	3866
			C1_14_2014o	1.23655e+08	1.83337e+06	189441	38	570	414.643	39401	29486	19525
			C1_15_2014o	5.15714e+08	4.11677e+07	153174	37	548	417.123	37311	43162	14283
			C1_16_2014o	1.54906e+08	6.3435e+06	116814	38	521	417.169	27140	36019	18880
			C1_17_2014o	1.06095e+08	2.62156e+07	121294	37	537	416.771	28784	26622	11424
			C1_18_2014o	6.22601e+08	5.74455e+06	25535	138	539	416.928	6507	22557	8072
			C1_19_2014o	1.34677e+08	1.38533e+06	111031	38	539	416.961	26132	75495	32920
			C1_20_2014o	1.84076e+06	288630	111138	36	550	416.214	24198	68389	11958
			C1_21_2014o	420805	0	110366	38	533	416.261	23261	40980	24656
			C1_22_2014o	7.71018e+07	8.77752e+06	102382	37	567	417.394	25138	42066	18447
		march 2015	C2_1_2015m	not available		236023	38	569	416.705	62451	264	74
			C2_2_2015m	1.49696e+09	9.29518e+07	224336	37	496	416.628	69288	33025	9096
			C2_3_2015m	9.03992e+08	3.56838e+07	211508	37	546	417.64	63308	3415	1010
			C2_5_2015m	5.78166e+08	3.1891e+07	199231	36	531	417.027	69205	64	1
			C2_6_2015m	9.73057e+08	4.84654e+07	233803	38	567	416.249	71619	44248	14329
			C2_7_2015m	4.67238e+08	4.58354e+06	259717	38	558	416.736	85715	24930	13150
			C2_8_2015m	2.20625e+08	4.92956e+07	217103	38	547	417.49	72654	37906	20071
			C2_9_2015m	2.5504e+08	7.88787e+06	202232	38	539	417.359	62008	2772	812
			C2_10_2015m	1.70858e+09	1.24862e+08	260742	37	525	416.811	86488	35549	17955
			C2_11_2015m	5.00844e+08	2.12278e+07	292557	34	513	416.457	94733	27495	13579
			C2_13_2015m	9.28911e+07	3.59109e+06	223565	37	552	417.448	74733	31663	12951
			C2_14_2015m	not available		390926	37	539	416.615	181207	6382	2974
			C2_15_2015m	4.13666e+08	3.76109e+06	270504	38	493	416.041	90679	25419	14455
			C2_16_2015m	5.65112e+07	997710	201378	35	515	417.502	69440	44649	19644
			C2_17_2015m	3.3681e+08	1.22835e+07	283468	38	475	416.631	88925	71756	46251
			C2_18_2015m	7.47745e+08	4.44348e+07	270108	37	554	415.304	84620	36915	25827
			C2_19_2015m	3.98797e+08	1.1323e+07	240674	38	513	416.86	77002	36448	18540
			C2_20_2015m	3.0095e+08	4.68085e+06	248371	38	569	417.195	81746	28239	15549
			C2_21_2015m	1.18748e+08	7.47637e+06	217320	38	536	417.593	79754	25534	12414
			C2_22_2015m	4.83361e+08	3.98265e+07	191332	38	557	416.862	63976	32456	17699
		september 2015	C3_1_2015s	1.28105e+09	5.20544e+07	217656	37	541	416.553	67274	45066	11816
			C3_2_2015s	9.53872e+08	4.51024e+07	180442	38	562	417.401	52218	53248	7328
			C3_3_2015s	3.5003e+09	2.00802e+08	222919	34	547	416.178	72826	28050	8556
			C3_5_2015s	8.09295e+08	3.76272e+07	216319	38	549	417.268	66103	42372	17737
			C3_6_2015s	5.43014e+08	4.20285e+07	187237	38	552	417.205	56021	93620	27777
			C3_7_2015s	5.99402e+08	3.34442e+07	223766	37	541	417.708	81246	47873	9264
			C3_8_2015s	7.96763e+08	3.64417e+07	214873	37	553	418.088	67870	86760	20531
			C3_9_2015s	8.10478e+08	3.87604e+07	188331	34	550	417.423	57162	52682	20656
			C3_10_2015s	1.37165e+08	3.96712e+06	133734	38	550	417.788	42353	121502	32924
			C3_11_2015s	2.40123e+09	5.15926e+07	226106	37	533	417.692	70286	48775	26844
			C3_13_2015s	5.91916e+08	1.13647e+07	163771	38	543	418.02	43970	30810	1892
			C3_14_2015s	5.24247e+08	4.47018e+07	242705	38	497	417.208	68298	37299	25105
			C3_15_2015s	2.39202e+08	1.5092e+07	164798	38	556	418.072	53480	70582	21685
			C3_16_2015s	1.65631e+08	8.73221e+06	206307	36	535	417.461	68792	33571	10263
			C3_17_2015s	7.01821e+08	4.33276e+07	273162	36	552	416.435	82415	58208	33772
			C3_18_2015s	7.02352e+08	4.95961e+07	228375	38	550	417.115	64981	45722	16988
			C3_19_2015s	3.55142e+08	2.46953e+07	277908	33	555	417.46	93895	43829	16895
			C3_20_2015s	1.20818e+09	7.79105e+07	245342	34	553	417.362	81970	47399	17312
			C3_21_2015s	1.92211e+09	1.54558e+08	268179	36	554	416.147	83043	41323	20059
			C3_22_2015s	8.49331e+08	6.53646e+07	222664	35	554	416.895	61898	35005	16236
DB	Sediment deposits from the detention basin (see Marti et al., 2017)	october 2013	BR_2013o_P1	4.96253e+10	6.67786e+08	103468	44	539	415.755	21749	53711	12406
			BR_2013o_P2	2.48673e+11	2.86845e+10	113868	65	539	418.848	21120	43376	21073
			BR_2013o_P4	4.1833e+11	2.66298e+10	139174	38	539	415.853	30946	45255	10747
			BR_2013o_P7	1.42613e+11	9.46871e+09	126713	38	539	415.693	28790	25108	8973
		april 2014	BR_2014a_P1	2.90449e+11	1.73199e+10	119627	34	546	417.095	24591	37898	14470
			BR_2014a_P2	3.81255e+11	1.17752e+10	118079	37	538	417.598	23373	51237	20635
			BR_2014a_P4	7.28663e+11	1.99919e+10	121050	38	548	416.902	24456	75858	29945
			BR_2014a_P7	8.15776e+10	3.75672e+09	111719	37	555	417.267	22155	37057	5108
		february 2014	BR_2014f_P1	1.55699e+10	1.53741e+09	135391	34	539	415.738	27325	55677	16387
			BR_2014f_P2	3.51275e+11	2.40717e+10	137484	38	556	415.428	28735	46872	19983
			BR_2014f_P4	2.27067e+11	1.9755e+10	19308	80	504	415.243	6062	44648	5313
			BR_2014f_P7	2.4393e+11	2.02585e+10	115571	38	539	415.796	25348	38184	8690
		july 2014	BR_2014j_P1	2.9798e+08	1.37751e+08	125238	38	540	418.778	21026	38261	12278
			BR_2014j_P2	2.07343e+11	8.73053e+08	113171	38	541	418.77	20624	40765	17632
			BR_2014j_P4	1.90536e+11	9.99069e+09	159988	38	552	416.529	32206	58429	20688
			BR_2014j_P7	1.76407e+11	3.62636e+09	124702	33	551	418.716	22131	39442	9670
		april 2015	BR_2015a_P1	2.93499e+10	1.48491e+08	210960	37	546	417.797	61781	13448	4735
			BR_2015a_P2	2.11067e+10	3.30798e+09	185283	38	554	418.738	49779	21165	6612
			BR_2015a_P4	8.87924e+09	3.47096e+08	193051	36	539	417.817	57523	15313	4636
			BR_2015a_P7	8.79839e+09	1.33457e+09	254539	33	539	416.764	74225	46713	4674
IB	Sediments samples (0-50 cm depth) from the infiltration basin	november 2015	VF1_ZA_2015n	1.37402e+11	2.54197e+10	212619	38	556	417.326	59766	70675	24919
			VF2_ZA_2015n	1.2138e+11	1.11088e+10	187624	36	556	419.059	52586	29417	13441
			VF3_ZA_2015n	1.46064e+11	1.37509e+10	203861	38	556	417.92	51732	37168	12663
			VF4_ZA_2015n	1.05305e+11	3.63226e+10	181177	37	533	418.534	48886	30174	12410
			VF5_ZA_2015n	9.45411e+10	1.24164e+10	173629	35	556	418.436	46316	28717	11974
			VF6_ZA_2015n	1.03737e+11	1.30998e+10	204025	35	557	418.187	55523	11586	3294
			VF7_ZB_2015n	8.73307e+10	2.94276e+10	193858	36	558	418.198	54171	20525	6405
			VF8_ZB_2015n	1.0163e+11	4.6498e+10	198776	38	556	418.828	48193	15654	5370
			VF9_ZB_2015n	3.46188e+11	3.16352e+11	116411	38	512	417.385	33815	68510	20002
			VF10_ZB_2015n	1.17742e+11	1.43943e+10	206561	33	553	418.882	52587	40508	15119
			VF11_ZH_2015n	1.32352e+11	7.56129e+10	225377	38	555	418.272	56011	52829	16520
			VF12_ZH_2015n	1.1395e+11	6.10464e+10	221276	38	555	418.319	55269	49024	14936
			VF13_ZH_2015n	1.31762e+11	3.19896e+10	203512	34	556	418.2	50839	47849	19000
			VF14_ZH_2015n	1.04271e+11	2.54844e+10	70712	38	493	417.275	29133	20644	3728
			VF15_ZH_2015n	1.42095e+11	4.42336e+10	211533	37	558	418.502	57315	25876	8327
AQ_bio_up	Aquifer biofilm sample collected upstream the stormwater infiltration system (see Voisin et al., 2018)	september 2015	JBio_Am1_2015s	6.62953e+06	194756	57665	29	513	408.882	25809	79053	43527
			JBio_Am2_2015s	7.02643e+06	1.03078e+06	155688	26	513	408.622	61754	16246	13548
			JBio_Am3_2015s	6.15921e+06	605046	122322	28	546	408.552	51420	55679	38935
AQ_bio_dw	Aquifer biofilm sample collected downstream of the stormwater infiltration system (see Voisin et al., 2018)		JBio_Av1_2015s	1.92348e+07	1.23763e+06	118783	28	521	407.828	39167	103521	77805
			JBio_Av2_2015s	1.35168e+07	753184	109023	29	516	407.58	32445	55807	43244
			JBio_Av3_2015s	3.05741e+08	5.07391e+07	125969	29	553	408.731	38774	31379	23381
AQ_wat_up	Aquifer water sample collected upstream the stormwater infiltration system (see Voisin et al., 2018)		JEau_AmJ0_2015s	7171.37	580.918	154982	29	507	410.263	59529	51633	41145
			JEau_AmJ10_2015s	6942.13	512.981	115472	29	546	411.409	32476	76791	48320
			JEau_AmJ5_2015s	6855.86	165.187	169773	31	537	410.269	64731	72452	50813
AQ_wat_dw	Aquifer water sample collected downstream the stormwater infiltration system (see Voisin et al., 2018)		JEau_AvJ0_2015s	35549.6	1526.55	107788	40	529	408.849	31124	19782	4718
			JEau_AvJ10_2015s	9212.84	1226.21	176475	29	544	408.812	42988	29686	21072
			JEau_AvJ5_2015s	16062.4	1095.61	90793	29	514	409.365	31963	49721	33735
*: Mean rrs read length was 408 bp, maximum 415 bp, and minimum 375 bp.
**: Mean tpm read length was 215 bp, maximum 233 bp, and minimum 195 bp.
WS: Watershed runoff waters; DB: Detention basin sediments IB: Infiltration basin sediments ; AQ_wat: Aquifer waters; AQ_bio: Aquifer biofilms.

## Sheet: Table S3
Table S3. Number of tpm reads among blank samples run during the tpm meta-barcoding procedure, and their taxonomic allocation and relatedness to OTUs recovered from the environmental samples. *: restricted to above ground samples; **: not considered in the coalescence analysis, see Table S10.
blank sample OTU	total number of reads	identical OTU sequence among the environmental samples	maximum % identity with environmental tpm sequences	genus	species	blank 1 (soil)	blank 2 (soil)	blank 3 (water)	blank 4 (water)	blank 5 (water)
Otu01	867	Otu00573*	100	Pseudomonas	unclassified	0	0	0	867	0
Otu02	118		99	Pseudomonas	fluorescens	0	0	0	118	0
Otu03	21		99	Pseudomonas	fluorescens	21	0	0	0	0
Otu04	17		no match	unclassified	unclassified	1	0	15	0	0
Otu05	17	Otu00151*	100	Pseudomonas	xanthomarina	0	0	8	9	0
Otu06	13		no match	unclassified	unclassified	1	0	12	0	0
Otu07	10		99	Pseudomonas	unclassified	0	0	0	10	0
Otu08	7		no match	unclassified	unclassified	0	1	6	0	0
Otu09	7		99	Pseudomonas	unclassified	0	0	0	7	0
Otu10	6		no match	unclassified	unclassified	1	0	5	0	0
Otu11	5		no match	unclassified	unclassified	0	0	5	0	0
Otu12	4	Otu01054**	100	unclassified	unclassified	0	0	0	3	0
Otu13	3		99	Pseudomonas	unclassified	0	0	0	3	0
Otu14	3	Otu00069	100	Pseudomonas	fragi	0	0	3	0	0
Otu15	3	Otu00002*	100	Pseudomonas	unclassified	0	0	2	1	0
Otu16	2		99	Pseudomonas	unclassified	0	0	0	2	0
Otu17	2		no match	unclassified	unclassified	0	0	0	1	0
Otu18	2		98	unclassified	unclassified	0	0	2	0	0
Otu19	2	Otu00519**	100	unclassified	unclassified	0	0	0	1	1
Otu20	2		99	Pseudomonas	unclassified	0	0	0	2	0
Otu21	2		99	Pseudomonas	unclassified	0	0	0	2	0
Otu22	2	Otu00556**	100	unclassified	unclassified	0	2	0	0	0
Otu23	2		99	Pseudomonas	unclassified	0	0	0	2	0

## Sheet: Table S4
Table S4. Relative proportion of the main bacterial phyla (mean ± sd) inferred from the V5-V6 16S rRNA gene dataset over the investigated watershed and aquifer*
phylum	WS	DB	IB	AQ_wat	AQ_bio
Proteobacteria	59.02 ± 10.25	43.90 ± 7.60	39.33 ± 4.81	50.04 ± 15.36	87.34 ± 8.58
Bacteroidetes	15.73 ± 9.02	30.70 ± 12.10	10.93 ± 5.61	6.11 ± 5.70	3.50 ± 1.32
Actinobacteria	20.30 ± 14.48	9.73 ± 7.48	21.13 ± 6.08	2.47 ± 1.95	7.96 ± 8.99
Chloroflexi	0.20 ± 0.44	0.59 ± 1.18	6.81 ± 4.78	10.83 ± 6.80	0.05 ± 0.03
Acidobacteria	0.66 ± 0.66	3.77 ± 2.56	4.33 ± 4.26	5.39 ± 7.45	+
Gemmatimonadetes	0.80 ± 0.88	1.66 ± 1.10	7.23 ± 1.69	0.20 ± 0.30	+
Planctomycetes	0.66 ± 1.83	4.09 ± 5.00	2.81 ± 1.59	1.81 ± 1.69	+
Nitrospirae	0.04 ± 0.05	0.75 ± 1.38	3.31 ± 3.46	3.90 ± 3.46	0.05 ± 0.01
Elusimicrobia	0.02 ± 0.04	0.13 ± 0.20	0.57 ± 0.31	4.92 ± 5.54	+
Firmicutes	0.42 ± 0.39	0.74 ± 0.56	0.10 ± 0.03	3.11 ± 5.90	0.82 ± 1.28
Saccharibacteria	0.58 ± 0.67	2.01 ± 1.95	0.86 ± 1.41	+	0.05 ± 0.07
Chlorobi	0.12 ± 0.14	0.95 ± 1.05	0.35 ± 0.46	+	+
Gracilibacteria	nd	nd	nd	0.55 ± 0.70	+
*Only bacterial phyla showing relative abundances greater than 0.5% in at least one of the compartment are presented. +: relative abundance < 0.05%; nd: not detected. WS: Watershed runoff waters; DB: Detention basin sediments IB: Infiltration basin sediments ; AQ_wat: Aquifer waters; AQ_bio: Aquifer biofilms.

## Sheet: Table S5
Table S5. Alpha-diversity estimates (mean ± sd) inferred from the V5-V6 16S rRNA gene dataset.
index/compartment	WS	DB	IB	AQ_wat	AQ_bio
S.obs	1287.5 ± 232.08	1565.95 ± 125.07	1503.20 ± 177.29	490.00 ± 333.2	278.50 ± 106.41
H'	5.0 ± 0.54	5.38 ± 0.25	5.65 ± 0.35	4.30 ± 0.7	2.94 ± 0.26
J	0.7 ± 0.06	0.73 ± 0.03	0.77 ± 0.04	0.72 ± 0.1	0.53 ± 0.05
S.obs :total number of OTUs per sample (singletons were not considered); H': Shannon-Weaver index; J: Pielou’s evenness index. WS: Watershed runoff waters; DB: Detention basin sediments IB: Infiltration basin sediments; AQ_wat: Aquifer waters; AQ_bio: Aquifer biofilms.

## Sheet: Table S6
Table S6. Relative proportion of bacterial genera (mean ± sd) inferred from the V5-V6 16S rRNA gene datasets with (A) showing genera exclusively detected in aquifer samples, (B) those exclusively detected in upper compartments, and (C) those among all samples.
A "+" refers to relative abundances < 0.05% and "nd" means "not detected".
WS: Watershed runoff waters; DB: Detention basin sediments IB: Infiltration basin sediments; AQ_wat: Aquifer waters; AQ_bio: Aquifer biofilms.
(A) Bacterial genera exclusively reported in aquifer samples						(B) Bacterial genera exclusively reported in upper compartments							(C) Bacterial genera detected in the upper compartments and aquifer
phylum	order	genus	AQ_wat	AQ_bio		phylum	order	genus	WS	DB	IB		phylum	order	genus	WS	DB	IB	AQ_wat	AQ_bio
Actinobacteria	Corynebacteriales	Turicella	+	0.47 ± 1.14		Acidobacteria	Acidobacteriales	Koribacter	+	+	+		Acidobacteria	Subgroup_3	Bryobacter	+	0.33 ± 0.31	0.36 ± 0.24	0.14 ± 0.17	nd
Chlamydiae	Chlamydiales	Fritschea	+	nd		Acidobacteria	Acidobacteriales	Granulicella	+	nd	nd		Acidobacteria	Subgroup_4	Blastocatella	0.29 ± 0.42	+	+	+	nd
Chlamydiae	Chlamydiales	Metachlamydia	+	nd		Acidobacteria	Acidobacteriales	Telmatobacter	+	nd	nd		Actinobacteria	Acidimicrobiales	Microthrix	+	0.07 ± 0.06	0.17 ± 0.15	+	0.25 ± 0.52
Firmicutes	Bacillales	Macrococcus	+	nd		Acidobacteria	Acidobacteriales	Terriglobus	+	nd	nd		Actinobacteria	Acidimicrobiales	Iamia	0.12 ± 0.09	0.42 ± 0.38	0.96 ± 0.39	+	0.29 ± 0.22
Firmicutes	Clostridiales	Anaerococcus	0.12 ± 0.28	0.19 ± 0.46		Acidobacteria	Holophagales	Geothrix	+	0.3 ± 0.43	+		Actinobacteria	Bifidobacteriales	Bifidobacterium	+	+	+	+	nd
Firmicutes	Clostridiales	Finegoldia	0.2 ± 0.27	nd		Acidobacteria	Holophagales	Holophaga	+	+	nd		Actinobacteria	Corynebacteriales	Corynebacterium	+	nd	nd	nd	+
Firmicutes	Lactobacillales	Abiotrophia	0.17 ± 0.40	+		Acidobacteria	Subgroup_3	Solibacter	+	+	0.08 ± 0.09		Actinobacteria	Corynebacteriales	Corynebacterium_1	+	+	+	0.07 ± 0.15	0.08 ± 0.19
Firmicutes	Selenomonadales	Dialister	+	nd		Actinobacteria	Acidimicrobiales	Aciditerrimonas	+	+	0.08 ± 0.06		Actinobacteria	Corynebacteriales	Mycobacterium	0.35 ± 0.26	2.09 ± 2.68	1.37 ± 0.73	0.11 ± 0.20	0.21 ± 0.18
Nitrospirae	Nitrospirales	Leptospirillum	+	nd		Actinobacteria	Acidimicrobiales	Illumatobacter	0.07 ± 0.05	0.07 ± 0.04	0.28 ± 0.13		Actinobacteria	Corynebacteriales	Nocardia	+	+	0.11 ± 0.35	+	3.62 ± 5.27
Omnitrophica	Unknown_Order	Omnitrophus	+	nd		Actinobacteria	Actinomycetales	Actinomyces	+	+	+		Actinobacteria	Corynebacteriales	Rhodococcus	0.16 ± 0.13	0.29 ± 0.38	0.19 ± 0.15	+	0.34 ± 0.27
Proteobacteria	Campylobacterales	Campylobacter	0.06 ± 0.14	nd		Actinobacteria	Actinomycetales	Flaviflexus	nd	+	nd		Actinobacteria	Corynebacteriales	Tsukamurella	nd	+	+	+	0.17 ± 0.30
Proteobacteria	Campylobacterales	Sulfurimonas	nd	+		Actinobacteria	Corynebacteriales	Dietzia	0.09 ± 0.24	0.07 ± 0.08	+		Actinobacteria	Corynebacteriales	Williamsia	0.26 ± 0.22	0.55 ± 0.63	+	nd	0.05 ± 0.13
Proteobacteria	Pasteurellales	Haemophilus	0.81 ± 1.98	0.27 ± 0.64		Actinobacteria	Corynebacteriales	Gordonia	+	0.09 ± 0.08	+		Actinobacteria	Frankiales	Blastococcus	8.85 ± 7.87	1.37 ± 1.02	0.61 ± 0.73	nd	+
Proteobacteria	Rhizobiales	Nitratireductor	+	nd		Actinobacteria	Corynebacteriales	Segniliparus	+	+	nd		Actinobacteria	Frankiales	Planktophila	+	+	+	+	+
						Actinobacteria	Euzebyales	Euzebya	+	nd	nd		Actinobacteria	Frankiales	hgcI_clade	0.27 ± 0.51	+	+	+	+
						Actinobacteria	Frankiales	Acidothermus	+	nd	nd		Actinobacteria	Frankiales	Modestobacter	0.99 ± 0.89	0.07 ± 0.05	0.12 ± 0.11	+	nd
						Actinobacteria	Frankiales	Cryptosporangium	+	+	+		Actinobacteria	Frankiales	Nakamurella	0.1 ± 0.08	0.06 ± 0.03	0.52 ± 0.26	+	+
						Actinobacteria	Frankiales	Fodinicola	+	0.05 ± 0.03	0.27 ± 0.19		Actinobacteria	Gaiellales	Gaiella	0.09 ± 0.21	+	4.78 ± 2.99	0.07 ± 0.12	+
						Actinobacteria	Frankiales	Geodermatophilus	1.79 ± 1.65	0.08 ± 0.04	0.09 ± 0.12		Actinobacteria	Kineosporiales	Kineococcus	+	+	+	nd	+
						Actinobacteria	Frankiales	Jatrophihabitans	+	+	+		Actinobacteria	Micrococcales	Agrococcus	+	+	+	nd	+
						Actinobacteria	Frankiales	Sporichthya	+	+	+		Actinobacteria	Micrococcales	Agromyces	+	+	0.13 ± 0.13	nd	+
						Actinobacteria	Glycomycetales	Glycomyces	+	nd	nd		Actinobacteria	Micrococcales	Alpinimonas	+	+	nd	+	+
						Actinobacteria	Kineosporiales	Angustibacter	+	+	+		Actinobacteria	Micrococcales	Arthrobacter	0.38 ± 0.62	0.06 ± 0.04	0.23 ± 0.18	0.13 ± 0.31	0.24 ± 0.42
						Actinobacteria	Kineosporiales	Kineosporia	0.1 ± 0.09	+	0.13 ± 0.16		Actinobacteria	Micrococcales	Brevibacterium	+	+	nd	+	+
						Actinobacteria	Kineosporiales	Quadrisphaera	0.2 ± 0.25	+	+		Actinobacteria	Micrococcales	Planktoluna	+	+	nd	+	nd
						Actinobacteria	Micrococcales	Actinotalea	0.06 ± 0.08	0.16 ± 0.12	+		Actinobacteria	Micrococcales	Rhodoluna	+	+	nd	+	+
						Actinobacteria	Micrococcales	Amnibacterium	+	+	+		Actinobacteria	Micrococcales	Curtobacterium	+	+	nd	+	0.09 ± 0.23
						Actinobacteria	Micrococcales	Aquipuribacter	0.06 ± 0.07	+	+		Actinobacteria	Micrococcales	Demequina	+	0.16 ± 0.13	+	nd	+
						Actinobacteria	Micrococcales	Brachybacterium	+	+	nd		Actinobacteria	Micrococcales	Knoellia	+	+	+	nd	+
						Actinobacteria	Micrococcales	Aquiluna	+	nd	nd		Actinobacteria	Micrococcales	Kocuria	+	+	+	+	nd
						Actinobacteria	Micrococcales	Cellulomonas	0.07 ± 0.07	+	+		Actinobacteria	Micrococcales	Leucobacter	+	+	+	+	nd
						Actinobacteria	Micrococcales	Cellulosimicrobium	+	+	+		Actinobacteria	Micrococcales	Lysinimonas	+	0.05 ± 0.07	0.08 ± 0.11	+	+
						Actinobacteria	Micrococcales	Chryseoglobus	+	+	+		Actinobacteria	Micrococcales	Microbacterium	0.09 ± 0.09	0.18 ± 0.10	0.15 ± 0.12	+	0.1 ± 0.14
						Actinobacteria	Micrococcales	Citricoccus	+	+	+		Actinobacteria	Micrococcales	Microcella	0.07 ± 0.14	+	+	nd	+
						Actinobacteria	Micrococcales	Cryobacterium	+	+	+		Actinobacteria	Micrococcales	Micrococcus	+	+	+	+	nd
						Actinobacteria	Micrococcales	Dermatophilus	+	nd	nd		Actinobacteria	Micrococcales	Promicromonospora	+	nd	nd	+	nd
						Actinobacteria	Micrococcales	Galbitalea	+	nd	nd		Actinobacteria	Micrococcales	Rothia	+	+	+	0.26 ± 0.64	+
						Actinobacteria	Micrococcales	Georgenia	+	+	+		Actinobacteria	Micrococcales	Salana	+	+	+	nd	+
						Actinobacteria	Micrococcales	Intrasporangium	+	+	+		Actinobacteria	Micrococcales	Sanguibacter	+	+	+	+	nd
						Actinobacteria	Micrococcales	Janibacter	+	+	nd		Actinobacteria	Micrococcales	Yonghaparkia	+	+	nd	nd	+
						Actinobacteria	Micrococcales	Lysinimicrobium	+	+	nd		Actinobacteria	Micromonosporales	Actinoplanes	0.08 ± 0.08	+	0.14 ± 0.14	+	nd
						Actinobacteria	Micrococcales	Mobilicoccus	nd	+	nd		Actinobacteria	Propionibacteriales	Aeromicrobium	0.06 ± 0.05	0.08 ± 0.06	0.26 ± 0.20	+	0.55 ± 0.60
						Actinobacteria	Micrococcales	Naasia	+	nd	nd		Actinobacteria	Propionibacteriales	Marmoricola	0.26 ± 0.17	0.24 ± 0.30	0.31 ± 0.30	+	0.11 ± 0.18
						Actinobacteria	Micrococcales	Oceanitalea	+	nd	nd		Actinobacteria	Propionibacteriales	Nocardioides	0.34 ± 0.29	0.55 ± 0.68	0.5 ± 0.23	+	0.77 ± 1.11
						Actinobacteria	Micrococcales	Ornithinimicrobium	+	+	+		Actinobacteria	Propionibacteriales	Propionibacterium	+	+	+	0.53 ± 1.03	0.23 ± 0.25
						Actinobacteria	Micrococcales	Oryzihumus	+	+	+		Actinobacteria	Pseudonocardiales	Pseudonocardia	0.1 ± 0.08	0.08 ± 0.04	1.47 ± 1.04	nd	+
						Actinobacteria	Micrococcales	Phycicoccus	+	+	+		Actinobacteria	Rubrobacterales	Rubrobacter	+	+	+	nd	+
						Actinobacteria	Micrococcales	Piscicoccus	nd	+	nd		Actinobacteria	Solirubrobacterales	Patulibacter	+	+	0.05 ± 0.03	+	+
						Actinobacteria	Micrococcales	Pseudoclavibacter	+	+	+		Bacteroidetes	Bacteroidales	Alloprevotella	+	+	+	0.56 ± 1.38	nd
						Actinobacteria	Micrococcales	Rarobacter	+	nd	nd		Bacteroidetes	Bacteroidales	Bacteroides	0.12 ± 0.36	0.14 ± 0.14	+	nd	+
						Actinobacteria	Micrococcales	Rathayibacter	+	+	+		Bacteroidetes	Bacteroidales	Paludibacter	0.06 ± 0.20	2.02 ± 2.40	+	nd	+
						Actinobacteria	Micrococcales	Subtercola	+	nd	nd		Bacteroidetes	Bacteroidales	Porphyromonas	+	nd	nd	+	nd
						Actinobacteria	Micrococcales	Terrabacter	+	+	+		Bacteroidetes	Cytophagales	Adhaeribacter	0.7 ± 0.72	0.32 ± 0.47	0.06 ± 0.07	0.07 ± 0.18	+
						Actinobacteria	Micrococcales	Terracoccus	+	nd	nd		Bacteroidetes	Cytophagales	Algoriphagus	0.1 ± 0.26	+	+	0.09 ± 0.22	nd
						Actinobacteria	Micromonosporales	Catenuloplanes	+	nd	nd		Bacteroidetes	Cytophagales	Arcicella	+	+	+	nd	+
						Actinobacteria	Micromonosporales	Dactylosporangium	+	+	nd		Bacteroidetes	Cytophagales	Cytophaga	+	0.14 ± 0.18	+	+	+
						Actinobacteria	Micromonosporales	Longispora	nd	nd	+		Bacteroidetes	Cytophagales	Dyadobacter	+	+	+	+	nd
						Actinobacteria	Micromonosporales	Micromonospora	nd	+	+		Bacteroidetes	Cytophagales	Emticicia	+	+	+	0.06 ± 0.13	+
						Actinobacteria	Micromonosporales	Pilimelia	+	nd	+		Bacteroidetes	Cytophagales	Flectobacillus	+	+	nd	0.18 ± 0.23	+
						Actinobacteria	Nitriliruptorales	Nitriliruptor	+	nd	nd		Bacteroidetes	Cytophagales	Hymenobacter	0.47 ± 0.33	0.05 ± 0.06	+	+	+
						Actinobacteria	Propionibacteriales	Aestuariimicrobium	+	+	nd		Bacteroidetes	Cytophagales	Ohtaekwangia	+	0.07 ± 0.07	+	+	+
						Actinobacteria	Propionibacteriales	Auraticoccus	+	+	nd		Bacteroidetes	Cytophagales	Pseudarcicella	+	+	nd	0.34 ± 0.67	+
						Actinobacteria	Propionibacteriales	Brooklawnia	nd	+	+		Bacteroidetes	Cytophagales	Reichenbachiella	nd	+	+	nd	+
						Actinobacteria	Propionibacteriales	Friedmanniella	+	nd	nd		Bacteroidetes	Cytophagales	Runella	+	+	nd	+	nd
						Actinobacteria	Propionibacteriales	Kribbella	+	+	+		Bacteroidetes	Cytophagales	Spirosoma	2.35 ± 3.74	0.17 ± 0.19	+	+	+
						Actinobacteria	Propionibacteriales	Luteococcus	+	nd	nd		Bacteroidetes	Flavobacteriales	Chryseobacterium	1.42 ± 1.34	0.84 ± 0.94	0.08 ± 0.11	+	+
						Actinobacteria	Propionibacteriales	Microlunatus	+	+	+		Bacteroidetes	Flavobacteriales	Cloacibacterium	0.11 ± 0.21	1.14 ± 1.93	+	+	+
						Actinobacteria	Propionibacteriales	Micropruina	+	+	+		Bacteroidetes	Flavobacteriales	Flavobacterium	6.86 ± 6.26	13.37 ± 8.69	8.29 ± 5.94	1.05 ± 2.33	3.12 ± 1.23
						Actinobacteria	Propionibacteriales	Propionicicella	+	+	+		Bacteroidetes	Flavobacteriales	Fluviicola	+	+	+	0.19 ± 0.35	+
						Actinobacteria	Propionibacteriales	Propioniciclava	+	+	nd		Bacteroidetes	Flavobacteriales	Owenweeksia	+	+	nd	nd	+
						Actinobacteria	Propionibacteriales	Tessaracoccus	+	+	nd		Bacteroidetes	Sphingobacteriales	Arcticibacter	0.29 ± 0.61	0.05 ± 0.09	+	+	nd
						Actinobacteria	Propionibacteriales	Thermasporomyces	+	nd	nd		Bacteroidetes	Sphingobacteriales	Flavisolibacter	+	0.06 ± 0.05	+	nd	+
						Actinobacteria	Pseudonocardiales	Actinomycetospora	0.07 ± 0.19	+	0.09 ± 0.09		Bacteroidetes	Sphingobacteriales	Haliscomenobacter	+	+	nd	nd	+
						Actinobacteria	Pseudonocardiales	Actinophytocola	+	+	nd		Bacteroidetes	Sphingobacteriales	Mucilaginibacter	0.06 ± 0.10	+	+	+	nd
						Actinobacteria	Pseudonocardiales	Amycolatopsis	+	nd	+		Bacteroidetes	Sphingobacteriales	Nubsella	+	nd	+	+	nd
						Actinobacteria	Pseudonocardiales	Crossiella	+	+	nd		Bacteroidetes	Sphingobacteriales	Pedobacter	0.31 ± 0.51	0.21 ± 0.27	+	+	+
						Actinobacteria	Pseudonocardiales	Lentzea	+	+	+		Bacteroidetes	Sphingobacteriales	Phaeodactylibacter	+	+	+	+	nd
						Actinobacteria	Solirubrobacterales	Conexibacter	+	nd	nd		Bacteroidetes	Sphingobacteriales	Sediminibacterium	+	+	+	+	nd
						Actinobacteria	Solirubrobacterales	Solirubrobacter	+	+	0.35 ± 0.30		Bacteroidetes	Sphingobacteriales	Sphingobacterium	+	0.08 ± 0.06	+	+	+
						Actinobacteria	Streptomycetales	Streptomyces	+	nd	nd		Bacteroidetes	Sphingobacteriales	Taibaiella	+	+	+	+	nd
						Actinobacteria	Streptosporangiales	Actinocorallia	+	nd	+		Deinococcus-Thermus	Deinococcales	Deinococcus	+	+	nd	+	nd
						Actinobacteria	Streptosporangiales	Nocardiopsis	+	nd	nd		Firmicutes	Bacillales	Anaerobacillus	+	nd	nd	nd	0.05 ± 0.12
						Actinobacteria	Streptosporangiales	Thermomonospora	+	nd	nd		Firmicutes	Bacillales	Bacillus	+	+	+	0.16 ± 0.27	+
						Bacteroidetes	Bacteroidales	Alistipes	+	+	+		Firmicutes	Bacillales	Gemella	+	nd	nd	+	+
						Bacteroidetes	Bacteroidales	Alkaliflexus	+	nd	nd		Firmicutes	Bacillales	Staphylococcus	+	+	nd	0.12 ± 0.13	0.13 ± 0.21
						Bacteroidetes	Bacteroidales	Dysgonomonas	+	+	+		Firmicutes	Clostridiales	Acidaminobacter	+	0.08 ± 0.10	nd	nd	+
						Bacteroidetes	Bacteroidales	Macellibacteroides	+	0.42 ± 0.73	+		Firmicutes	Clostridiales	Peptoniphilus	+	nd	nd	0.12 ± 0.28	nd
						Bacteroidetes	Bacteroidales	Mangroviflexus	+	0.13 ± 0.14	+		Firmicutes	Clostridiales	Tissierella	+	+	+	nd	0.19 ± 0.45
						Bacteroidetes	Bacteroidales	Microbacter	+	0.05 ± 0.07	+		Firmicutes	Erysipelotrichales	Turicibacter	+	+	+	nd	+
						Bacteroidetes	Bacteroidales	Parabacteroides	+	+	+		Firmicutes	Lactobacillales	Granulicatella	+	+	nd	0.59 ± 1.40	+
						Bacteroidetes	Bacteroidales	Petrimonas	+	+	nd		Firmicutes	Lactobacillales	Lactobacillus	+	+	+	0.05 ± 0.13	nd
						Bacteroidetes	Bacteroidales	Phocaeicola	+	nd	nd		Firmicutes	Lactobacillales	Streptococcus	+	+	+	1.55 ± 3.24	0.23 ± 0.33
						Bacteroidetes	Bacteroidales	Prevotella	+	+	nd		Fusobacteria	Fusobacteriales	Fusobacterium	+	nd	nd	+	nd
						Bacteroidetes	Bacteroidales	Prevotella_7	+	nd	nd		Nitrospirae	Nitrospirales	Nitrospira	+	0.71 ± 1.34	3.3 ± 3.45	3.86 ± 3.42	+
						Bacteroidetes	Bacteroidales	Prevotella_9	0.12 ± 0.63	+	+		Planctomycetes	Phycisphaerales	SM1A02	+	+	0.13 ± 0.08	+	+
						Bacteroidetes	Bacteroidales	Proteiniphilum	+	+	+		Proteobacteria	Aeromonadales	Aeromonas	+	+	+	+	+
						Bacteroidetes	Bacteroidales	Ruminofilibacter	+	nd	nd		Proteobacteria	Aeromonadales	Tolumonas	+	+	+	+	nd
						Bacteroidetes	Bacteroidia	Draconibacterium	nd	+	nd		Proteobacteria	Bdellovibrionales	Bacteriovorax	0.17 ± 0.26	+	+	+	0.24 ± 0.31
						Bacteroidetes	Bacteroidia	Mariniphaga	+	nd	+		Proteobacteria	Bdellovibrionales	Bdellovibrio	0.62 ± 0.47	0.26 ± 0.20	0.28 ± 0.11	+	0.1 ± 0.15
						Bacteroidetes	Bacteroidia	Prolixibacter	+	+	+		Proteobacteria	Bdellovibrionales	Peredibacter	3.61 ± 2.56	2.75 ± 2.47	0.16 ± 0.12	0.08 ± 0.11	+
						Bacteroidetes	Cytophagales	Chryseolinea	+	0.15 ± 0.16	+		Proteobacteria	Betaproteobacteria	Chitinivorax	+	+	+	+	+
						Bacteroidetes	Cytophagales	Fibrella	+	+	nd		Proteobacteria	Burkholderiales	Aquabacterium	1.27 ± 0.96	1.13 ± 0.77	0.31 ± 0.21	0.26 ± 0.48	2.51 ± 2.46
						Bacteroidetes	Cytophagales	Fibrisoma	+	+	nd		Proteobacteria	Burkholderiales	Azohydromonas	0.13 ± 0.25	0.13 ± 0.18	+	nd	+
						Bacteroidetes	Cytophagales	Flexibacter	+	+	+		Proteobacteria	Burkholderiales	Burkholderia	+	+	nd	0.18 ± 0.43	+
						Bacteroidetes	Cytophagales	Larkinella	+	+	+		Proteobacteria	Burkholderiales	Caenimonas	+	0.12 ± 0.07	0.07 ± 0.06	nd	+
						Bacteroidetes	Cytophagales	Leadbetterella	+	0.06 ± 0.13	nd		Proteobacteria	Burkholderiales	Chitinimonas	+	+	+	+	nd
						Bacteroidetes	Cytophagales	Nibrella	+	nd	nd		Proteobacteria	Burkholderiales	Comamonas	+	+	+	+	+
						Bacteroidetes	Cytophagales	Nibribacter	+	nd	nd		Proteobacteria	Burkholderiales	Cupriavidus	+	+	+	nd	+
						Bacteroidetes	Cytophagales	Pontibacter	+	nd	nd		Proteobacteria	Burkholderiales	Delftia	+	+	+	0.06 ± 0.06	0.13 ± 0.15
						Bacteroidetes	Cytophagales	Rhodocytophaga	+	nd	nd		Proteobacteria	Burkholderiales	Duganella	0.39 ± 0.77	0.06 ± 0.03	+	+	5.07 ± 5.64
						Bacteroidetes	Cytophagales	Rhodonellum	+	nd	nd		Proteobacteria	Burkholderiales	Giesbergeria	+	+	nd	nd	+
						Bacteroidetes	Cytophagales	Rufibacter	+	+	nd		Proteobacteria	Burkholderiales	Ideonella	+	+	+	+	+
						Bacteroidetes	Cytophagales	Siphonobacter	+	nd	nd		Proteobacteria	Burkholderiales	Malikia	0.07 ± 0.12	0.08 ± 0.05	+	0.85 ± 1.28	0.13 ± 0.12
						Bacteroidetes	Cytophagales	Sporocytophaga	+	+	nd		Proteobacteria	Burkholderiales	Massilia	10.76 ± 6.35	1.6 ± 1.01	0.4 ± 0.33	0.19 ± 0.16	3.92 ± 3.01
						Bacteroidetes	Flavobacteriales	Actibacter	+	+	+		Proteobacteria	Burkholderiales	Paucibacter	+	+	+	nd	+
						Bacteroidetes	Flavobacteriales	Aequorivita	+	nd	nd		Proteobacteria	Burkholderiales	Polaromonas	0.12 ± 0.33	0.08 ± 0.08	+	nd	+
						Bacteroidetes	Flavobacteriales	Arenibacter	+	nd	nd		Proteobacteria	Burkholderiales	Polynucleobacter	0.23 ± 0.41	+	+	+	+
						Bacteroidetes	Flavobacteriales	Bergeyella	+	nd	nd		Proteobacteria	Burkholderiales	Pseudoduganella	+	0.11 ± 0.14	+	nd	+
						Bacteroidetes	Flavobacteriales	Blattabacterium	+	nd	nd		Proteobacteria	Burkholderiales	Ralstonia	+	nd	+	0.31 ± 0.45	+
						Bacteroidetes	Flavobacteriales	Sulcia	+	nd	nd		Proteobacteria	Burkholderiales	Ramlibacter	0.18 ± 0.34	0.32 ± 0.20	0.12 ± 0.09	+	+
						Bacteroidetes	Flavobacteriales	Uzinura	0.07 ± 0.25	nd	+		Proteobacteria	Burkholderiales	Rhizobacter	0.09 ± 0.08	0.09 ± 0.06	0.06 ± 0.04	+	0.1 ± 0.08
						Bacteroidetes	Flavobacteriales	Cellulophaga	+	nd	nd		Proteobacteria	Burkholderiales	Simplicispira	+	0.09 ± 0.07	+	nd	+
						Bacteroidetes	Flavobacteriales	Croceibacter	+	nd	nd		Proteobacteria	Burkholderiales	Sphaerotilus	+	+	+	nd	+
						Bacteroidetes	Flavobacteriales	Crocinitomix	+	+	+		Proteobacteria	Burkholderiales	Undibacterium	+	+	+	0.17 ± 0.36	0.48 ± 0.92
						Bacteroidetes	Flavobacteriales	Cruoricaptor	+	+	nd		Proteobacteria	Burkholderiales	Xylophilus	+	+	nd	nd	+
						Bacteroidetes	Flavobacteriales	Elizabethkingia	+	+	+		Proteobacteria	Campylobacterales	Arcobacter	+	+	+	+	+
						Bacteroidetes	Flavobacteriales	Empedobacter	+	+	nd		Proteobacteria	Caulobacterales	Brevundimonas	0.44 ± 0.47	0.52 ± 0.30	+	0.1 ± 0.12	0.41 ± 0.25
						Bacteroidetes	Flavobacteriales	Epilithonimonas	+	+	+		Proteobacteria	Caulobacterales	Caulobacter	0.05 ± 0.04	+	0.07 ± 0.07	+	+
						Bacteroidetes	Flavobacteriales	Gelidibacter	+	nd	nd		Proteobacteria	Caulobacterales	Phenylobacterium	0.2 ± 0.15	0.3 ± 0.13	0.17 ± 0.13	0.09 ± 0.15	0.26 ± 0.26
						Bacteroidetes	Flavobacteriales	Gillisia	0.15 ± 0.28	+	+		Proteobacteria	Caulobacterales	Woodsholea	+	0.24 ± 0.36	1.55 ± 1.14	+	+
						Bacteroidetes	Flavobacteriales	Hoppeia	+	nd	nd		Proteobacteria	Cellvibrionales	Cellvibrio	0.23 ± 0.17	0.23 ± 0.18	+	+	+
						Bacteroidetes	Flavobacteriales	Lutibacter	+	nd	nd		Proteobacteria	Cellvibrionales	Haliea	nd	+	nd	nd	+
						Bacteroidetes	Flavobacteriales	Mariniflexile	+	+	nd		Proteobacteria	Chromatiales	Acidiferrobacter	+	+	+	0.52 ± 0.96	+
						Bacteroidetes	Flavobacteriales	Moheibacter	+	nd	nd		Proteobacteria	Chromatiales	Rheinheimera	0.21 ± 0.23	0.16 ± 0.10	+	+	+
						Bacteroidetes	Flavobacteriales	Myroides	+	+	+		Proteobacteria	Desulfobacterales	Entotheonella	+	nd	+	0.22 ± 0.29	+
						Bacteroidetes	Flavobacteriales	Salegentibacter	+	nd	nd		Proteobacteria	Enterobacteriales	Buchnera	+	+	+	+	nd
						Bacteroidetes	Flavobacteriales	Salinimicrobium	+	nd	nd		Proteobacteria	Enterobacteriales	Pantoea	+	+	+	+	nd
						Bacteroidetes	Flavobacteriales	Sediminicola	+	nd	nd		Proteobacteria	Hydrogenophilales	Thiobacillus	+	0.14 ± 0.11	+	nd	+
						Bacteroidetes	Flavobacteriales	Soonwooa	nd	+	nd		Proteobacteria	Legionellales	Aquicella	+	+	+	0.16 ± 0.19	+
						Bacteroidetes	Flavobacteriales	Subsaxibacter	+	nd	nd		Proteobacteria	Legionellales	Coxiella	+	+	+	0.24 ± 0.30	nd
						Bacteroidetes	Flavobacteriales	Ulvibacter	+	nd	nd		Proteobacteria	Methylophilales	Methylophilus	+	+	+	+	+
						Bacteroidetes	Flavobacteriales	Vitellibacter	+	nd	nd		Proteobacteria	Methylophilales	Methylotenera	0.08 ± 0.10	0.07 ± 0.05	+	+	+
						Bacteroidetes	Order_II	Rubrivirga	0.08 ± 0.09	0.46 ± 1.23	+		Proteobacteria	Methylophilales	PRD01a011B	+	+	nd	nd	+
						Bacteroidetes	Sphingobacteriales	Aquirestis	+	nd	nd		Proteobacteria	Myxococcales	Haliangium	0.06 ± 0.13	0.12 ± 0.22	0.55 ± 0.26	0.25 ± 0.26	+
						Bacteroidetes	Sphingobacteriales	Ferruginibacter	+	0.12 ± 0.09	+		Proteobacteria	Myxococcales	Labilithrix	+	+	nd	+	nd
						Bacteroidetes	Sphingobacteriales	Flavihumibacter	+	+	nd		Proteobacteria	Myxococcales	Phaselicystis	0.07 ± 0.05	0.2 ± 0.17	0.15 ± 0.07	nd	+
						Bacteroidetes	Sphingobacteriales	Flavitalea	+	+	+		Proteobacteria	Myxococcales	Sandaracinus	+	+	0.09 ± 0.25	+	nd
						Bacteroidetes	Sphingobacteriales	Lacibacter	+	+	+		Proteobacteria	Myxococcales	Sorangium	0.06 ± 0.07	0.4 ± 0.28	0.21 ± 0.09	0.18 ± 0.17	+
						Bacteroidetes	Sphingobacteriales	Lewinella	+	+	+		Proteobacteria	Neisseriales	Deefgea	+	+	nd	nd	+
						Bacteroidetes	Sphingobacteriales	Parafilimonas	+	+	+		Proteobacteria	Neisseriales	Neisseria	+	nd	+	1.63 ± 3.96	+
						Bacteroidetes	Sphingobacteriales	Parasegetibacter	+	+	nd		Proteobacteria	Neisseriales	Vogesella	0.07 ± 0.18	+	+	+	+
						Bacteroidetes	Sphingobacteriales	Segetibacter	+	+	nd		Proteobacteria	Nitrosomonadales	Nitrosospira	+	+	+	nd	+
						Bacteroidetes	Sphingobacteriales	Solitalea	+	+	+		Proteobacteria	Oceanospirillales	Pseudospirillum	0.16 ± 0.28	0.11 ± 0.10	+	+	+
						Bacteroidetes	Sphingobacteriales	Terrimonas	+	0.1 ± 0.09	+		Proteobacteria	Parvularculales	Parvularcula	nd	nd	+	+	+
						Chlamydiae	Chlamydiales	Protochlamydia	+	nd	nd		Proteobacteria	Pseudomonadales	Acinetobacter	0.17 ± 0.34	0.17 ± 0.23	+	+	0.5 ± 0.84
						Chlamydiae	Chlamydiales	Criblamydia	+	+	nd		Proteobacteria	Pseudomonadales	Alkanindiges	2.22 ± 2.28	0.18 ± 0.34	+	+	+
						Chlorobi	Ignavibacteriales	Ignavibacterium	+	+	0.08 ± 0.28		Proteobacteria	Pseudomonadales	Moraxella	+	+	+	0.07 ± 0.18	nd
						Chloroflexi	Chloroflexales	Chloronema	+	+	+		Proteobacteria	Pseudomonadales	Perlucidibaca	+	+	+	+	1.75 ± 1.92
						Chloroflexi	Chloroflexales	Roseiflexus	+	+	+		Proteobacteria	Pseudomonadales	Pseudomonas	0.42 ± 0.50	0.36 ± 0.21	+	8.36 ± 17.50	35.51 ± 12.02
						Deinococcus-Thermus	Deinococcales	Truepera	+	nd	+		Proteobacteria	Rhizobiales	Afipia	+	+	+	+	+
						Diapherotrites	Unknown_Order	Iainarchaeum	nd	nd	+		Proteobacteria	Rhizobiales	Aquamicrobium	+	+	+	+	nd
						Fibrobacteres	Fibrobacterales	Fibrobacter	+	+	nd		Proteobacteria	Rhizobiales	Aureimonas	+	+	+	+	nd
						Fibrobacteres	Fibrobacterales	possible_genus_04	+	+	0.06 ± 0.06		Proteobacteria	Rhizobiales	Bauldia	+	+	0.09 ± 0.05	+	+
						Firmicutes	Bacillales	Anoxybacillus	+	nd	nd		Proteobacteria	Rhizobiales	Bosea	+	+	+	nd	+
						Firmicutes	Bacillales	Brochothrix	+	nd	nd		Proteobacteria	Rhizobiales	Bradyrhizobium	0.06 ± 0.08	0.58 ± 0.43	1.13 ± 0.47	+	+
						Firmicutes	Bacillales	Caldibacillus	+	+	nd		Proteobacteria	Rhizobiales	Devosia	0.15 ± 0.14	0.15 ± 0.13	0.39 ± 0.29	+	+
						Firmicutes	Bacillales	Exiguobacterium	+	+	+		Proteobacteria	Rhizobiales	Hyphomicrobium	+	+	0.12 ± 0.07	nd	+
						Firmicutes	Bacillales	Fontibacillus	+	nd	nd		Proteobacteria	Rhizobiales	Meganema	+	+	nd	+	1.31 ± 1.72
						Firmicutes	Bacillales	Geobacillus	+	+	nd		Proteobacteria	Rhizobiales	Methylobacterium	1.56 ± 1.32	0.12 ± 0.07	0.09 ± 0.11	0.06 ± 0.14	nd
						Firmicutes	Bacillales	Kurthia	+	nd	nd		Proteobacteria	Rhizobiales	Microvirga	0.24 ± 0.37	+	0.34 ± 0.36	+	+
						Firmicutes	Bacillales	Paenibacillus	+	+	nd		Proteobacteria	Rhizobiales	Nordella	+	+	0.13 ± 0.08	nd	+
						Firmicutes	Bacillales	Planomicrobium	+	nd	nd		Proteobacteria	Rhizobiales	Parvibaculum	+	+	+	+	nd
						Firmicutes	Bacillales	Shimazuella	+	nd	nd		Proteobacteria	Rhizobiales	Pedomicrobium	+	+	0.32 ± 0.19	+	+
						Firmicutes	Bacillales	Solibacillus	+	nd	nd		Proteobacteria	Rhizobiales	Rhizobium	0.05 ± 0.07	+	+	+	+
						Firmicutes	Bacillales	Sporosarcina	+	nd	nd		Proteobacteria	Rhizobiales	Shinella	+	+	+	0.1 ± 0.22	0.51 ± 0.67
						Firmicutes	Bacillales	Thermoflavimicrobium	+	nd	nd		Proteobacteria	Rhizobiales	Variibacter	+	0.06 ± 0.07	0.82 ± 0.25	0.25 ± 0.33	+
						Firmicutes	Bacillales	Ureibacillus	+	nd	nd		Proteobacteria	Rhodobacterales	Amaricoccus	+	+	0.22 ± 0.14	+	nd
						Firmicutes	Clostridiales	Acetivibrio	+	+	nd		Proteobacteria	Rhodobacterales	Defluviimonas	+	+	+	+	0.24 ± 0.32
						Firmicutes	Clostridiales	Acetoanaerobium	+	+	+		Proteobacteria	Rhodobacterales	Falsirhodobacter	+	nd	nd	+	+
						Firmicutes	Clostridiales	Acetobacterium	+	+	+		Proteobacteria	Rhodobacterales	Gemmobacter	+	+	nd	+	+
						Firmicutes	Clostridiales	Alkaliphilus	+	nd	nd		Proteobacteria	Rhodobacterales	Paracocccus	0.15 ± 0.19	+	+	nd	+
						Firmicutes	Clostridiales	Anaerosporobacter	+	+	nd		Proteobacteria	Rhodobacterales	Pseudorhodobacter	+	+	nd	nd	+
						Firmicutes	Clostridiales	Anaerostipes	+	nd	nd		Proteobacteria	Rhodobacterales	Rhodobacter	+	+	+	0.57 ± 1.31	0.52 ± 0.76
						Firmicutes	Clostridiales	Anaerotruncus	+	nd	+		Proteobacteria	Rhodobacterales	Rubellimicrobium	1.18 ± 0.77	0.65 ± 0.56	0.23 ± 0.20	nd	+
						Firmicutes	Clostridiales	Anaerovorax	+	+	nd		Proteobacteria	Rhodocyclales	Azospira	0.41 ± 2.90	0.06 ± 0.11	nd	+	nd
						Firmicutes	Clostridiales	Butyrivibrio	+	nd	nd		Proteobacteria	Rhodocyclales	Dechloromonas	0.09 ± 0.24	0.09 ± 0.06	+	+	0.12 ± 0.14
						Firmicutes	Clostridiales	Butyrivibrio_2	nd	+	nd		Proteobacteria	Rhodocyclales	Methyloversatilis	+	+	nd	+	0.09 ± 0.16
						Firmicutes	Clostridiales	Soleaferrea	+	+	nd		Proteobacteria	Rhodocyclales	Sulfuritalea	+	0.24 ± 0.38	+	0.09 ± 0.15	+
						Firmicutes	Clostridiales	Coprococcus_3	+	nd	nd		Proteobacteria	Rhodocyclales	Thauera	0.05 ± 0.09	0.07 ± 0.05	+	+	+
						Firmicutes	Clostridiales	Dorea	+	+	+		Proteobacteria	Rhodocyclales	Zoogloea	0.28 ± 1.91	0.14 ± 0.15	+	+	+
						Firmicutes	Clostridiales	Faecalibacterium	+	+	+		Proteobacteria	Rhodospirillales	Azospirillum	+	nd	nd	+	0.05 ± 0.07
						Firmicutes	Clostridiales	Fastidiosipila	+	+	+		Proteobacteria	Rhodospirillales	Alysiosphaera	+	+	0.12 ± 0.08	nd	+
						Firmicutes	Clostridiales	Fonticella	+	+	nd		Proteobacteria	Rhodospirillales	Defluviicoccus	+	0.09 ± 0.05	1.09 ± 1.72	+	nd
						Firmicutes	Clostridiales	Fusibacter	+	0.15 ± 0.19	+		Proteobacteria	Rhodospirillales	Ferrovibrio	+	+	+	0.6 ± 1.20	nd
						Firmicutes	Clostridiales	Fusicatenibacter	+	+	+		Proteobacteria	Rhodospirillales	Magnetospirillum	+	+	nd	+	+
						Firmicutes	Clostridiales	Gracilibacter	+	+	nd		Proteobacteria	Rhodospirillales	Reyranella	+	0.07 ± 0.08	0.41 ± 0.15	+	0.07 ± 0.10
						Firmicutes	Clostridiales	Incertae_Sedis	+	+	+		Proteobacteria	Rhodospirillales	Rhodovarius	+	+	nd	nd	+
						Firmicutes	Clostridiales	Lachnoanaerobaculum	+	nd	nd		Proteobacteria	Rhodospirillales	Rubritepida	0.36 ± 0.20	0.05 ± 0.06	+	nd	+
						Firmicutes	Clostridiales	Lachnoclostridium	+	+	+		Proteobacteria	Rickettsiales	Captivus	+	+	+	+	0.16 ± 0.40
						Firmicutes	Clostridiales	Lachnospira	+	+	+		Proteobacteria	Rickettsiales	Odyssella	+	+	+	0.2 ± 0.34	+
						Firmicutes	Clostridiales	Lutispora	+	+	nd		Proteobacteria	Rickettsiales	Rickettsia	+	+	+	+	nd
						Firmicutes	Clostridiales	Oxobacter	+	+	nd		Proteobacteria	Sphingomonadales	Altererythrobacter	0.2 ± 0.17	0.2 ± 0.22	0.1 ± 0.10	+	+
						Firmicutes	Clostridiales	Peptoclostridium	+	+	nd		Proteobacteria	Sphingomonadales	Novosphingobium	1.64 ± 7.95	+	+	0.11 ± 0.14	2.37 ± 3.05
						Firmicutes	Clostridiales	Peptostreptococcus	+	nd	nd		Proteobacteria	Sphingomonadales	Polymorphobacter	+	+	nd	+	nd
						Firmicutes	Clostridiales	Proteiniclasticum	+	+	nd		Proteobacteria	Sphingomonadales	Sphingobium	+	0.06 ± 0.04	+	0.16 ± 0.28	2.32 ± 3.21
						Firmicutes	Clostridiales	Proteocatella	+	+	+		Proteobacteria	Sphingomonadales	Sphingomonas	5.3 ± 3.80	1.88 ± 1.65	1.77 ± 1.11	0.07 ± 0.09	0.16 ± 0.17
						Firmicutes	Clostridiales	Pseudobutyrivibrio	+	nd	nd		Proteobacteria	Sphingomonadales	Sphingopyxis	+	0.07 ± 0.04	+	nd	+
						Firmicutes	Clostridiales	Romboutsia	+	+	nd		Proteobacteria	Sphingomonadales	Sphingorhabdus	0.16 ± 0.15	0.26 ± 0.25	+	+	+
						Firmicutes	Clostridiales	Roseburia	+	nd	nd		Proteobacteria	Sphingomonadales	Zymomonas	+	+	+	+	+
						Firmicutes	Clostridiales	Ruminiclostridium	+	nd	nd		Proteobacteria	Xanthomonadales	Acidibacter	+	0.14 ± 0.17	0.29 ± 0.18	nd	+
						Firmicutes	Clostridiales	Ruminiclostridium_1	+	+	+		Proteobacteria	Xanthomonadales	Arenimonas	0.1 ± 0.15	0.49 ± 0.42	0.25 ± 0.13	+	+
						Firmicutes	Clostridiales	Ruminiclostridium_5	+	nd	+		Proteobacteria	Xanthomonadales	Nevskia	+	+	+	+	0.13 ± 0.12
						Firmicutes	Clostridiales	Ruminiclostridium_9	nd	+	nd		Proteobacteria	Xanthomonadales	Panacagrimonas	+	+	+	nd	0.1 ± 0.08
						Firmicutes	Clostridiales	Ruminococcus_1	+	+	+		Proteobacteria	Xanthomonadales	Polycyclovorans	+	nd	+	nd	+
						Firmicutes	Clostridiales	Ruminococcus_2	+	+	+		Proteobacteria	Xanthomonadales	Stenotrophomonas	+	+	+	+	+
						Firmicutes	Clostridiales	Saccharofermentans	+	+	nd		Proteobacteria	Xanthomonadales	Steroidobacter	+	0.25 ± 0.23	0.14 ± 0.11	nd	+
						Firmicutes	Clostridiales	Salimesophilobacter	+	nd	nd		Spirochaetae	Spirochaetales	Spirochaeta_2	+	+	+	+	nd
						Firmicutes	Clostridiales	Sedimentibacter	+	+	nd		Spirochaetae	Spirochaetales	Turneriella	+	+	+	0.48 ± 1.16	nd
						Firmicutes	Clostridiales	Sporacetigenium	+	+	+		Verrucomicrobia	Verrucomicrobiales	Prosthecobacter	+	nd	nd	+	nd
						Firmicutes	Clostridiales	Subdoligranulum	+	+	+
						Firmicutes	Clostridiales	Syntrophomonas	+	+	+
						Firmicutes	Clostridiales	Tepidimicrobium	+	nd	nd
						Firmicutes	Lactobacillales	Aerosphaera	+	nd	nd
						Firmicutes	Lactobacillales	Alkalibacterium	+	nd	nd
						Firmicutes	Lactobacillales	Atopostipes	+	nd	nd
						Firmicutes	Lactobacillales	Enterococcus	+	0.05 ± 0.04	+
						Firmicutes	Lactobacillales	Lactococcus	+	+	+
						Firmicutes	Lactobacillales	Leuconostoc	+	nd	nd
						Firmicutes	Lactobacillales	Trichococcus	+	+	nd
						Firmicutes	Lactobacillales	Weissella	+	+	nd
						Firmicutes	Selenomonadales	Pelosinus	nd	+	nd
						Fusobacteria	Fusobacteriales	Leptotrichia	+	+	+
						Gemmatimonadetes	Gemmatimonadales	Gemmatimonas	0.16 ± 0.12	0.49 ± 0.23	1.58 ± 1.21
						Proteobacteria	Alteromonadales	Alishewanella	+	nd	nd
						Proteobacteria	Alteromonadales	Idiomarina	+	nd	nd
						Proteobacteria	Alteromonadales	Marinobacter	+	nd	nd
						Proteobacteria	Alteromonadales	Paraglaciecola	+	nd	nd
						Proteobacteria	Alteromonadales	Pseudoalteromonas	+	nd	nd
						Proteobacteria	Alteromonadales	Shewanella	+	+	+
						Proteobacteria	Bdellovibrionales	OM27_clade	+	+	+
						Proteobacteria	Burkholderiales	Achromobacter	+	nd	nd
						Proteobacteria	Burkholderiales	Alcaligenes	+	nd	nd
						Proteobacteria	Burkholderiales	Alicycliphilus	+	+	nd
						Proteobacteria	Burkholderiales	Bordetella	+	nd	nd
						Proteobacteria	Burkholderiales	Glomeribacter	+	nd	+
						Proteobacteria	Burkholderiales	Diaphorobacter	+	+	nd
						Proteobacteria	Burkholderiales	Kinneretia	+	nd	nd
						Proteobacteria	Burkholderiales	Lautropia	+	+	0.13 ± 0.12
						Proteobacteria	Burkholderiales	Limnobacter	0.27 ± 0.15	0.06 ± 0.05	+
						Proteobacteria	Burkholderiales	Noviherbaspirillum	0.28 ± 0.31	+	+
						Proteobacteria	Burkholderiales	Paenalcaligenes	+	nd	nd
						Proteobacteria	Burkholderiales	Parasutterella	+	+	+
						Proteobacteria	Burkholderiales	Pelomonas	+	+	nd
						Proteobacteria	Burkholderiales	Piscinibacter	+	+	+
						Proteobacteria	Burkholderiales	Pseudacidovorax	+	nd	nd
						Proteobacteria	Burkholderiales	Rivibacter	nd	+	nd
						Proteobacteria	Burkholderiales	Schlegelella	+	nd	nd
						Proteobacteria	Burkholderiales	Sutterella	+	+	nd
						Proteobacteria	Burkholderiales	Telluria	+	nd	nd
						Proteobacteria	Burkholderiales	Tepidimonas	+	+	nd
						Proteobacteria	Burkholderiales	Verminephrobacter	+	nd	nd
						Proteobacteria	Burkholderiales	Xenophilus	+	+	nd
						Proteobacteria	Campylobacterales	Sulfurospirillum	0.08 ± 0.53	+	nd
						Proteobacteria	Caulobacterales	Asticcacaulis	+	+	+
						Proteobacteria	Caulobacterales	Hirschia	+	+	+
						Proteobacteria	Caulobacterales	Hyphomonas	+	+	nd
						Proteobacteria	Cellvibrionales	Simiduia	+	+	+
						Proteobacteria	Chromatiales	Thioalkalispira	nd	+	+
						Proteobacteria	Deltaproteobacteria	Syntrophorhabdus	+	nd	+
						Proteobacteria	Desulfobacterales	Desulfatirhabdium	+	+	nd
						Proteobacteria	Desulfobacterales	Desulfatitalea	+	nd	nd
						Proteobacteria	Desulfobacterales	Desulfocapsa	+	nd	nd
						Proteobacteria	Desulfovibrionales	Bilophila	+	nd	nd
						Proteobacteria	Desulfovibrionales	Desulfomicrobium	+	+	+
						Proteobacteria	Desulfovibrionales	Desulfovibrio	+	+	+
						Proteobacteria	Desulfuromonadales	Desulfuromonas	+	nd	nd
						Proteobacteria	Desulfuromonadales	Geobacter	+	+	+
						Proteobacteria	Desulfuromonadales	Geothermobacter	+	+	+
						Proteobacteria	Enterobacteriales	Arsenophonus	+	nd	nd
						Proteobacteria	Enterobacteriales	Cronobacter	+	+	nd
						Proteobacteria	Enterobacteriales	Erwinia	+	+	+
						Proteobacteria	Enterobacteriales	Proteus	+	nd	nd
						Proteobacteria	Enterobacteriales	Serratia	+	+	+
						Proteobacteria	Enterobacteriales	Thorsellia	+	nd	nd
						Proteobacteria	Hydrogenophilales	Ferritrophicum	+	+	nd
						Proteobacteria	Hydrogenophilales	Sulfuricella	nd	+	nd
						Proteobacteria	Legionellales	Legionella	+	+	+
						Proteobacteria	Methylococcales	Crenothrix	+	+	nd
						Proteobacteria	Methylococcales	Methylobacter	+	+	nd
						Proteobacteria	Methylococcales	Methylocaldum	+	nd	nd
						Proteobacteria	Methylococcales	Methylomonas	+	+	nd
						Proteobacteria	Methylococcales	Methylovulum	nd	+	+
						Proteobacteria	Methylophilales	LD28_freshwater_group	+	nd	nd
						Proteobacteria	Myxococcales	Anaeromyxobacter	0.07 ± 0.11	0.31 ± 0.23	0.2 ± 0.18
						Proteobacteria	Myxococcales	Byssovorax	+	+	+
						Proteobacteria	Myxococcales	Chondromyces	+	+	+
						Proteobacteria	Myxococcales	Hyalangium	nd	+	nd
						Proteobacteria	Myxococcales	Jahnella	+	nd	nd
						Proteobacteria	Myxococcales	Nannocystis	+	0.12 ± 0.14	+
						Proteobacteria	Myxococcales	Pseudenhygromyxa	nd	nd	+
						Proteobacteria	Myxococcales	Pyxidicoccus	+	+	nd
						Proteobacteria	Myxococcales	Vulgatibacter	+	+	+
						Proteobacteria	Neisseriales	Aquaspirillum	+	+	nd
						Proteobacteria	Neisseriales	Formivibrio	+	+	+
						Proteobacteria	Neisseriales	Laribacter	+	+	+
						Proteobacteria	Neisseriales	Leeia	+	+	nd
						Proteobacteria	Neisseriales	Microvirgula	+	+	nd
						Proteobacteria	Neisseriales	Paludibacterium	+	nd	nd
						Proteobacteria	Neisseriales	Uruburuella	+	+	+
						Proteobacteria	Neisseriales	Vitreoscilla	nd	+	nd
						Proteobacteria	Nitrosomonadales	Nitrotoga	+	+	+
						Proteobacteria	Nitrosomonadales	Gallionella	+	+	+
						Proteobacteria	Nitrosomonadales	Nitrosomonas	+	+	+
						Proteobacteria	Nitrosomonadales	Sideroxydans	+	+	+
						Proteobacteria	Oceanospirillales	Alcanivorax	+	nd	nd
						Proteobacteria	Oceanospirillales	Hahella	+	+	+
						Proteobacteria	Oceanospirillales	Halomonas	+	nd	nd
						Proteobacteria	Oceanospirillales	Oleiphilus	+	nd	nd
						Proteobacteria	Orbales	Gilliamella	+	nd	nd
						Proteobacteria	Order_Incertae_Sedis	Marinicella	+	+	+
						Proteobacteria	Procabacteriales	Procabacter	+	+	+
						Proteobacteria	Pseudomonadales	Azotobacter	+	+	nd
						Proteobacteria	Pseudomonadales	Enhydrobacter	+	nd	nd
						Proteobacteria	Pseudomonadales	Psychrobacter	+	nd	+
						Proteobacteria	Rhizobiales	Agaricicola	+	nd	+
						Proteobacteria	Rhizobiales	Aliihoeflea	+	nd	nd
						Proteobacteria	Rhizobiales	Alsobacter	+	+	+
						Proteobacteria	Rhizobiales	Ancalomicrobium	+	+	nd
						Proteobacteria	Rhizobiales	Aurantimonas	+	nd	nd
						Proteobacteria	Rhizobiales	Camelimonas	+	+	nd
						Proteobacteria	Rhizobiales	Chelatococcus	+	+	nd
						Proteobacteria	Rhizobiales	Cucumibacter	+	nd	nd
						Proteobacteria	Rhizobiales	Ensifer	+	+	+
						Proteobacteria	Rhizobiales	Hansschlegelia	+	nd	+
						Proteobacteria	Rhizobiales	Kaistia	+	+	+
						Proteobacteria	Rhizobiales	Labrys	+	+	+
						Proteobacteria	Rhizobiales	Mesorhizobium	+	+	+
						Proteobacteria	Rhizobiales	Methylocella	+	nd	nd
						Proteobacteria	Rhizobiales	Methylocystis	+	nd	+
						Proteobacteria	Rhizobiales	Methylorosula	+	+	+
						Proteobacteria	Rhizobiales	Neorhizobium	+	nd	nd
						Proteobacteria	Rhizobiales	Pelagibacterium	+	nd	+
						Proteobacteria	Rhizobiales	Phreatobacter	+	+	+
						Proteobacteria	Rhizobiales	Phyllobacterium	+	nd	nd
						Proteobacteria	Rhizobiales	Pleomorphomonas	+	+	+
						Proteobacteria	Rhizobiales	Prosthecomicrobium	+	+	+
						Proteobacteria	Rhizobiales	Pseudochrobactrum	+	+	nd
						Proteobacteria	Rhizobiales	Pseudolabrys	+	+	0.1 ± 0.06
						Proteobacteria	Rhizobiales	Pseudoxanthobacter	+	nd	nd
						Proteobacteria	Rhizobiales	Rhizomicrobium	+	+	+
						Proteobacteria	Rhizobiales	Rhodomicrobium	+	nd	+
						Proteobacteria	Rhizobiales	Rhodoplanes	+	+	+
						Proteobacteria	Rhizobiales	Rhodopseudomonas	+	+	+
						Proteobacteria	Rhizobiales	Tardiphaga	+	nd	nd
						Proteobacteria	Rhizobiales	Vasilyevaea	nd	+	nd
						Proteobacteria	Rhizobiales	Xanthobacter	+	+	nd
						Proteobacteria	Rhodobacterales	Ketogulonicigenium	+	nd	nd
						Proteobacteria	Rhodobacterales	Loktanella	+	nd	nd
						Proteobacteria	Rhodobacterales	Paenirhodobacter	+	nd	nd
						Proteobacteria	Rhodobacterales	Roseovarius	+	nd	nd
						Proteobacteria	Rhodobacterales	Seohaeicola	+	nd	nd
						Proteobacteria	Rhodobacterales	Tabrizicola	nd	+	nd
						Proteobacteria	Rhodocyclales	Azoarcus	+	+	+
						Proteobacteria	Rhodocyclales	Azovibrio	+	+	nd
						Proteobacteria	Rhodocyclales	Denitratisoma	+	0.06 ± 0.10	+
						Proteobacteria	Rhodocyclales	Denitromonas	+	nd	nd
						Proteobacteria	Rhodocyclales	Georgfuchsia	+	+	+
						Proteobacteria	Rhodocyclales	Propionivibrio	+	+	+
						Proteobacteria	Rhodocyclales	Sterolibacterium	nd	+	+
						Proteobacteria	Rhodocyclales	Uliginosibacterium	0.06 ± 0.11	+	+
						Proteobacteria	Rhodospirillales	Acetobacter	+	nd	nd
						Proteobacteria	Rhodospirillales	Acidicaldus	+	nd	+
						Proteobacteria	Rhodospirillales	Acidiphilium	0.31 ± 0.29	+	+
						Proteobacteria	Rhodospirillales	Acidisoma	+	nd	nd
						Proteobacteria	Rhodospirillales	Acidocella	+	nd	nd
						Proteobacteria	Rhodospirillales	Belnapia	0.25 ± 0.14	0.12 ± 0.08	+
						Proteobacteria	Rhodospirillales	Craurococcus	0.54 ± 0.39	+	0.11 ± 0.09
						Proteobacteria	Rhodospirillales	Dongia	+	+	nd
						Proteobacteria	Rhodospirillales	Elioraea	+	nd	nd
						Proteobacteria	Rhodospirillales	Endobacter	+	nd	nd
						Proteobacteria	Rhodospirillales	Geminicoccus	+	+	+
						Proteobacteria	Rhodospirillales	Gluconobacter	+	nd	nd
						Proteobacteria	Rhodospirillales	Insolitispirillum	+	+	nd
						Proteobacteria	Rhodospirillales	Novispirillum	+	+	nd
						Proteobacteria	Rhodospirillales	Oleomonas	+	nd	nd
						Proteobacteria	Rhodospirillales	Paracraurococcus	nd	+	nd
						Proteobacteria	Rhodospirillales	Roseococcus	+	+	+
						Proteobacteria	Rhodospirillales	Roseomonas	0.97 ± 0.60	0.06 ± 0.04	0.05 ± 0.06
						Proteobacteria	Rhodospirillales	Skermanella	+	+	nd
						Proteobacteria	Rhodospirillales	Telmatospirillum	+	nd	nd
						Proteobacteria	Rickettsiales	Gigarickettsia	+	+	nd
						Proteobacteria	Rickettsiales	Midichloria	nd	+	+
						Proteobacteria	Rickettsiales	Neorickettsia	+	nd	nd
						Proteobacteria	Rickettsiales	Wolbachia	+	nd	nd
						Proteobacteria	Sphingomonadales	Erythrobacter	+	+	nd
						Proteobacteria	Sphingomonadales	Sandaracinobacter	+	+	+
						Proteobacteria	Sphingomonadales	Sandarakinorhabdus	+	nd	+
						Proteobacteria	Sphingomonadales	Sphingosinicella	+	+	+
						Proteobacteria	Syntrophobacterales	Desulfobacca	nd	+	nd
						Proteobacteria	Syntrophobacterales	Smithella	nd	+	+
						Proteobacteria	Syntrophobacterales	Syntrophobacter	+	nd	nd
						Proteobacteria	Syntrophobacterales	Syntrophus	nd	+	nd
						Proteobacteria	Thiotrichales	Beggiatoa	nd	nd	+
						Proteobacteria	Xanthomonadales	Competibacter	nd	+	+
						Proteobacteria	Xanthomonadales	Chiayiivirga	+	0.06 ± 0.06	+
						Proteobacteria	Xanthomonadales	Dokdonella	+	0.12 ± 0.14	+
						Proteobacteria	Xanthomonadales	Fontimonas	+	+	+
						Proteobacteria	Xanthomonadales	Koukoulia	+	nd	nd
						Proteobacteria	Xanthomonadales	Lysobacter	0.05 ± 0.05	0.09 ± 0.11	+
						Proteobacteria	Xanthomonadales	Pseudoxanthomonas	+	+	+
						Proteobacteria	Xanthomonadales	Rehaibacterium	nd	+	nd
						Proteobacteria	Xanthomonadales	Silanimonas	+	nd	nd
						Proteobacteria	Xanthomonadales	Solimonas	+	+	+
						Proteobacteria	Xanthomonadales	Tahibacter	+	0.07 ± 0.08	+
						Proteobacteria	Xanthomonadales	Xanthomonas	+	nd	+
						Spirochaetae	Spirochaetales	Treponema	+	+	+
						Spirochaetae	Spirochaetales	Treponema_2	+	+	+
						Tenericutes	Acholeplasmatales	Acholeplasma	+	+	+
						Tenericutes	Anaeroplasmatales	Anaeroplasma	+	nd	nd
						Verrucomicrobia	Unknown_Order	Pedosphaera	nd	nd	+
						Verrucomicrobia	Verrucomicrobiales	Verrucomicrobium	+	nd	nd

## Sheet: Table S7
Table S7. Distribution of the main bacterial phyla (mean ± sd) inferred from the tpm gene dataset
phylum	WS	DB	IB	AQ_wat	AQ_bio
Proteobacteria	91.71 ± 11.00	86.46 ± 11.67	76.29 ± 15.37	82.85 ± 20	85.02 ± 17.24
Bacteroidetes	0.25 ± 0.56	0.07 ± 0.21	nd	nd	nd
Nitrospirae	nd	0.14 ± 0.16	+	nd	+
Cyanobacteria	0.05 ± 0.33	nd	nd	nd	nd
Others	7.99 ± 11.02	13.33 ± 11.54	23.68 ± 15.37	17.15 ± 20	14.97 ± 17.24
A "+" refers to relatives abundances < 0.05% and "nd" means "not detected"; WS: Watershed runoff waters; DB: Detention basin sediments; IB: Infiltration basin sediments; AQ_wat: Aquifer waters; AQ_bio: Aquifer biofilms.

## Sheet: Table S8
Table S8. Distribution of the bacterial genera (mean ± sd) inferred from the tpm gene dataset with (A) showing genera exclusively detected in aquifer samples, (B) those exclusively detected in upper compartments, and (C) those among all samples.
(A) exclusively in aquifer			(B) exclusively in upper compartments*
none			phylum	genus	WS	DB	IB
			Bacteroidetes	Spirosoma (3)	0.24 ± 0.56	0.07 ± 0.21	nd
			Cyanobacteria	Crinalium (3)	0.05 ± 0.33	nd	nd
			Proteobacteria	Alcanivorax (2)	+	nd	nd
			Proteobacteria	Azoarcus (14)	+	nd	nd
			Proteobacteria	Cellvibrio (1)	nd	+	nd
			Proteobacteria	Curvibacter (15)	0.25 ± 1.45	+	nd
			Proteobacteria	Dechloromonas (1)	nd	+	nd
			Proteobacteria	Herbaspirillum (277)	10.74 ± 15.48	2.31 ± 2.45	+
			Proteobacteria	Marinobacter (1)	nd	+	nd
			Proteobacteria	Methylovulum (1)	nd	+	nd
			Proteobacteria	Pseudoxanthomonas (1)	+	nd	nd
			Proteobacteria	Pusillimonas (2)	+	nd	nd
			Proteobacteria	Rugosibacter (2)	nd	+	nd
			Proteobacteria	Salinicola (1)	+	nd	nd
			Proteobacteria	Shewanella (19)	0.29 ± 2.02	+	nd
(C) Detected in the upper compartments and aquifer*
phylum	genus	WS	DB	IB	AQ_wat	AQ_bio
Nitrospirae	Nitrospira (24)	nd	0.14 ± 0.16	+	+	nd
Proteobacteria	Aeromonas (338)	0.82 ± 2.16	2.74 ± 4.20	+	0.07 ± 0.10	+
Proteobacteria	Aquaspirillum (66)	+	1.29 ± 4.74	+	+	nd
Proteobacteria	Halomonas (7)	+	nd	nd	+	+
Proteobacteria	Nitrosomonas (206)	+	4.4 ± 9.26	0.23 ± 0.41	+	+
Proteobacteria	Pseudomonas (3813)	35.52 ± 17.92	27.19 ± 21.75	7.26 ± 8.14	51.42 ± 24.03	47.6 ± 27.26
Proteobacteria	Stenotrophomonas (142)	0.68 ± 3.42	0.93 ± 1.58	0.26 ± 0.43	+	nd
Proteobacteria	Xanthobacter (13)	+	+	nd	+	+
Proteobacteria	Xanthomonas (96)	4.37 ± 9.71	+	1.32 ± 2.13	8.27 ± 19.63	+
*All bacterial taxa are indicated including those with a low prevalence; the number of tpm OTUs representing each genus is indicated in parenthesis. A "+" refers to relatives abundances < 0.05% and "nd" means "not detected". WS: Watershed runoff waters; DB: Detention basin sediments; IB: Infiltration basin sediments; AQ_wat: Aquifer waters; AQ_bio:Aquifer biofilms.

## Sheet: Table S9
Table S9. Distribution of bacterial species (mean ± sd) inferred from the tpm gene dataset with (A) showing species exclusively detected in aquifer samples, (B) those exclusively detected in upper compartments, and (C) those among all samples.
(A) Bacterial species exclusively reported in aquifer samples							(C) Bacterial species detected in both upper compartments and aquifer
phylum	genus	species	AQ_wat	AQ_bio			phylum	genus	species	WS	DB	IB	AQ_wat	AQ_bio
Proteobacteria	Pseudomonas	jessenii (1)	0.2 ± 0.49	+			Nitrospirae	Nitrospira	defluvii (23)	nd	0.14 ± 0.15	+	+	nd
Proteobacteria	Pseudomonas	chlororaphis (1)	+	nd			Proteobacteria	Aeromonas	caviae (8)	+	0.09 ± 0.22	+	nd	+
Proteobacteria	Pseudomonas	resinovorans (2)	+	+			Proteobacteria	Nitrosomonas	oligotropha (193)	+	4.32 ± 9.25	0.23 ± 0.39	+	+
							Proteobacteria	Pseudomonas	aeruginosa (76)	1.9 ± 3.85	0.06 ± 0.14	0.12 ± 0.36	+	0.09 ± 0.23
(B) Bacterial species exclusively reported in upper compartments							Proteobacteria	Pseudomonas	anguilliseptica (107)	1.68 ± 4.83	0.61 ± 0.73	+	+	0.63 ± 1.54
phylum	genus	species	WS	DB	IB		Proteobacteria	Pseudomonas	anguilliseptica_like (117)	1.8 ± 3.69	0.34 ± 0.44	0.21 ± 0.64	+	nd
Cyanobacteria	Crinalium	epipsammum (3)	0.05 ± 0.33	nd	nd		Proteobacteria	Pseudomonas	chengduensis (12)	nd	+	+	10.28 ± 25.14	nd
Proteobacteria	Aeromonas	allosaccharophila (1)	+	nd	nd		Proteobacteria	Pseudomonas	extremaustralis (26)	0.11 ± 0.47	0.28 ± 0.99	nd	+	nd
Proteobacteria	Aeromonas	bestiarum (3)	nd	+	nd		Proteobacteria	Pseudomonas	fluorescens (24)	0.11 ± 0.33	nd	+	nd	+
Proteobacteria	Aeromonas	encheleia (3)	+	+	nd		Proteobacteria	Pseudomonas	fragi (52)*	1.34 ± 4.86	+	+	+	nd
Proteobacteria	Aeromonas	eucrenophila (18)	+	+	+		Proteobacteria	Pseudomonas	gessardii (2)	+	nd	nd	nd	0.09 ± 0.19
Proteobacteria	Aeromonas	hydrophila (80)	0.29 ± 0.78	1.22 ± 3.23	+		Proteobacteria	Pseudomonas	koreensis (442)	5.2 ± 5.76	0.32 ± 0.40	1.18 ± 1.75	+	+
Proteobacteria	Aeromonas	media (13)	+	0.09 ± 0.12	nd		Proteobacteria	Pseudomonas	pseudoalcaligenes (18)	1.04 ± 6.16	0.17 ± 0.31	+	+	nd
Proteobacteria	Aeromonas	molluscorum (3)	+	+	nd		Proteobacteria	Pseudomonas	putida (6)	+	+	0.08 ± 0.27	+	nd
Proteobacteria	Aeromonas	salmonicida (5)	nd	+	nd		Proteobacteria	Pseudomonas	stutzeri (120)	1.54 ± 3.04	+	+	1.54 ± 3.77	+
Proteobacteria	Aeromonas	sanarellii (2)	+	+	nd		Proteobacteria	Pseudomonas	umsongensis (26)	+	+	nd	2.88 ± 6.08	15.55 ± 15.35
Proteobacteria	Aeromonas	veronii (1)	nd	+	nd		Proteobacteria	Pseudomonas	viridiflava (52)	0.43 ± 1.35	nd	0.83 ± 2.11	+	nd
Proteobacteria	Alcanivorax	jadensis (2)	+	nd	nd		Proteobacteria	Stenotrophomonas	acidaminiphila (26)	0.13 ± 0.45	0.44 ± 1.07	0.14 ± 0.26	+	nd
Proteobacteria	Azoarcus	tolulyticus (3)	+	nd	nd		Proteobacteria	Xanthobacter	autotrophicus (13)	+	+	nd	+	+
Proteobacteria	Curvibacter	lanceolatus (6)	0.08 ± 0.37	+	nd		Proteobacteria	Xanthomonas	axonopodis.campestris (19)	0.25 ± 0.75	nd	1.27 ± 2.06	8.26 ± 19.63	+
Proteobacteria	Dechloromonas	aromatica (1)	nd	+	nd		Proteobacteria	Xanthomonas	cannabis (1)	3.74 ± 9.47	nd	nd	+	+
Proteobacteria	Herbaspirillum	aquaticum (268)	10.73 ± 15.47	2.3 ± 2.45	+		All bacterial taxa are indicated including those with a low prevalence; the number of tpm OTUs representing each species is indicated in parenthesis. A "+" refers to relatives abundances < 0.1% and "nd" means "not detected". A blue letter code indicates a bacterial species containing tpm OTUs shared between the upper compartments and the connected aquifer (see table 2). WS: Watershed runoff water…
Proteobacteria	Herbaspirillum	seropidecae (1)	+	nd	nd
Proteobacteria	Marinobacter	hydrocarbonoclasticus (1)	nd	+	nd
Proteobacteria	Nitrosomonas	ureae (3)	+	+	+
Proteobacteria	Pseudomonas	alcaligenes (26)	0.19 ± 0.34	+	+
Proteobacteria	Pseudomonas	amygdali.syringae (3)	+	nd	nd
Proteobacteria	Pseudomonas	azotoformans (10)	0.11 ± 0.63	+	nd
Proteobacteria	Pseudomonas	brenneri (7)	+	+	nd
Proteobacteria	Pseudomonas	caspiana (4)	+	nd	nd
Proteobacteria	Pseudomonas	extremorientalis (3)	+	nd	nd
Proteobacteria	Pseudomonas	flavescens (13)	+	nd	+
Proteobacteria	Pseudomonas	flexibilis (1)	+	nd	nd
Proteobacteria	Pseudomonas	fluvialis (1)	+	nd	nd
Proteobacteria	Pseudomonas	frederiksbergensis (6)	0.1 ± 0.38	nd	+
Proteobacteria	Pseudomonas	fulva (1)	+	nd	nd
Proteobacteria	Pseudomonas	grimontii (39)	0.19 ± 0.48	+	nd
Proteobacteria	Pseudomonas	japonica (2)	+	nd	+
Proteobacteria	Pseudomonas	kilonensis (3)	+	nd	0.07 ± 0.20
Proteobacteria	Pseudomonas	kunmingensis (1)	+	nd	nd
Proteobacteria	Pseudomonas	lurida (27)	0.62 ± 1.40	0.14 ± 0.59	0.07 ± 0.22
Proteobacteria	Pseudomonas	marginalis (3)	+	nd	nd
Proteobacteria	Pseudomonas	mendocina (2)	+	nd	nd
Proteobacteria	Pseudomonas	monteilii.putida (1)	+	nd	nd
Proteobacteria	Pseudomonas	moraviensis (4)	+	nd	nd
Proteobacteria	Pseudomonas	nitroreducens (1)	+	nd	nd
Proteobacteria	Pseudomonas	orientalis (8)	+	nd	nd
Proteobacteria	Pseudomonas	palleroniana (8)	0.52 ± 2.19	nd	nd
Proteobacteria	Pseudomonas	parafulva (2)	+	nd	nd
Proteobacteria	Pseudomonas	pelagia (7)	0.08 ± 0.45	+	nd
Proteobacteria	Pseudomonas	poae (1)	+	nd	nd
Proteobacteria	Pseudomonas	reinekei (1)	nd	+	nd
Proteobacteria	Pseudomonas	rhodesiae (85)	1.2 ± 2.72	0.18 ± 0.37	1.26 ± 4.00
Proteobacteria	Pseudomonas	sihuiensis (4)	nd	0.07 ± 0.16	nd
Proteobacteria	Pseudomonas	synxantha (2)	nd	+	nd
Proteobacteria	Pseudomonas	syringae (71)	0.93 ± 1.90	nd	+
Proteobacteria	Pseudomonas	toyotomiensis (1)	0.06 ± 0.40	nd	nd
Proteobacteria	Pseudomonas	xanthomarina (11)*	0.05 ± 0.18	+	nd
Proteobacteria	Pseudoxanthomonas	suwonensis (1)	+	nd	nd
Proteobacteria	Pusillimonas	noertemannii (1)	+	nd	nd
Proteobacteria	Rugosibacter	aromaticivorans (2)	nd	+	nd
Proteobacteria	Salinicola	socius (1)	+	nd	nd
Proteobacteria	Shewanella	baltica (19)	0.29 ± 2.02	+	nd
Proteobacteria	Stenotrophomonas	daejeonensis (1)	nd	+	nd
Proteobacteria	Stenotrophomonas	maltophilia.pictorum (1)	nd	+	nd
Proteobacteria	Stenotrophomonas	nitritireducens (1)	nd	nd	+
Proteobacteria	Stenotrophomonas	terrae (70)	0.12 ± 0.41	0.39 ± 0.62	0.06 ± 0.19
Proteobacteria	Xanthomonas	arboricola (1)	+	nd	+
Proteobacteria	Xanthomonas	axonopodis (1)	+	nd	nd
Proteobacteria	Xanthomonas	campestris (1)	+	nd	nd
Proteobacteria	Xanthomonas	euvesicatoria (1)	+	nd	nd
Proteobacteria	Xanthomonas	hortorum (3)	0.16 ± 0.83	nd	nd
Proteobacteria	Xanthomonas	phaseoli (4)	+	nd	nd
*: one OTU of this species was found among the tpm blank samples shown in Table Sxx

## Sheet: Table S10
Table S10. OTU tpm gene sequences shared between the upper compartments and aquifer, and their relative occurrence over the full dataset.
OTU code	taxonomic allocation levels			WS	DB	IB	AQ_wat_up	AQ_wat_dw	AQ_bio_up	AQ_bio_dw	tpm sequence
	phylum	genus	species
Otu00003	Proteobacteria	Pseudomonas	sp_	0.2	0.01	0	20.49	23.91	0.01	28.8	GCCTGGATATGGCCTGGTTGGCGGGGCAGGGTTATCACGTCGTCGGTGTTGAGCTGGCGCAGCGTGCAGTGGAAGATTTCTTCGACGAGCATAAGCTGCTGCCGGAGGTCAGTGAGGTCGGCGCGCTCAGGCTGTATCGGGCTGGCGCTGTGGAAATCTACTGCGGTGATTTCTTTGCCCTGACGGCGCAGCAGCTTGCTGACTGCTCCGCACTG
Otu00004	Proteobacteria	Xanthomonas	cannabis	3.74	0	0	0	0.01	0.01	0.01	CGCTGGACATGCATTGGCTGGCGGCGCAAGGCCATCGCGTGCTTGGCGTGGAGCTGTCGCCGCTGGCGGTGACGCAATTCTTCGATGAGGCAGGGCTTCAACCGAAGCGTCACAGCAGCGCTGCTGGCGAGCATTTCATCGCCGGCCCGATCGAGATCATCTGCGGCGATGCATTCGCGCTAGACGCCAGCGCGCTGGCCGACTGCACGGCCGTC
Otu00005	Proteobacteria	Pseudomonas	umsongensis	0	0.01	0	0.41	5.34	17.79	11.71	GCCTGGACCTGCTGTGGCTGGCGCAGCGAGGCCATGAGGTGCTGGGGATCGAACTGTCGGAAAAGGCTGTCGAGGATTTCTTCAGCGAGCATCAATTTGATCCAGCAGTGGATGAACAAGGACCTTTCAAGGTATATCGCGCAGGTTCCATCGAGCTGTGGTGTGGCGATTTCTTCGATCTGACGCCAGGCGATGTCGCCGACTGCTCGGCCGTC
Otu00006	Proteobacteria	GpI	GpI	2.81	1.13	0.03	0.01	0	0	0	GCCTGGATCTGGCCTGGTTGGCGGGGCAGGGTTATCACGTCGTCGGTGTTGAGCTGGCGCAGCGTGCAGTGGAAGATTTCTTCGACGAGCATAAGCTGCTGCCGGAGGTCAGTGAGGTCGGCGCGCTCAGGCTGTATCGGGCTGGCGCTGTGGAAATCTACTGCGGTGATTTCTTCGCCCTGACGGCTCAGCAGCTTGATGGCTGTTCCGCACTG
Otu00009	Proteobacteria	Gp_CC8	Gp_CC8	0.73	3.96	0.95	0	0.04	0.01	0	GCCTCGATCTGGCCCATCTGGCGGACATGGGCTGCACGGTGGTCGGGGTTGAGCTGAGCGAACAGGCCATCGCGGCCTTCTTCGCCGAGCGCGGACTCGCGCCGCAGGTGACCGTGGAAGCGCGCTGCAGCCGCTGGGTCGCGGGTTCCTACATCTTGTTGCAAGGGGATTATTTCACGCTCACCGCAGCAGACCTGGGCGCGCCCTGCACCGGC
Otu00010	Gp_DE/Proteobacteria	unknown	unknown	1.6	1.55	0.46	0	0.01	0	0	CGCTGGATATTCCTTGGCTGCTTTCCAACGGCTATCGTGTCGCGGGAGCTGAATTGAGCCCAATCGCCATTAAGGACCTGTTTGCACAGCTGGGCGTGAAACCCACGATCACAAGAAACGGTGGAACGGACCATTACCGTGCGACCGATATCGACGTCTTTGTGGGCGACATTTTCGACGTCATGATGAAGATGCTTGGCCCCGTCGATGCGATT
Otu00011	Bacteria_unclassified	Bacteria_unclassified	Bacteria_unclassified	0	0	0	9.47	1.45	25.9	2.56	CCAAGGATATCGCCTATCTGCTCAGTTGTGGCTATCGAGTGCTCGGTGTCGAATTGAGCGCATTGGCGATACTCGACTTGTTTCAAGAATTGTCAATCACGCCCGAGATAAACCAGGTTGGCGAGTTTTCCCGTTACAGCGCCGATGGCATCAACATTTTTGTGGGAGACTTTTTTCAACTAGGCTCTGAGCTCACTGGCAAAATAGATGCAATC
Otu00013	Proteobacteria	Proteobacteria_unclassified	Proteobacteria_unclassified	0.08	0.12	0	0.04	0	34.8	0.35	CCCGGGATTTTGCCTGGCTGCTTGCCTGCGGTTATCGCGTTGCTGGTGCAGAATTGAGCGAACTCGCCATCGTCGAGTTGTTTAACGAACTTGGCCTGGAGCCGGAAATCTCCAGCGCCGGAAAGTTACTGCGCTACAGCGCCACGAATATCGACATCTGGGTGGGCGATATTTTTGATGTCTCTGCGGAAAATCTCGGGCCGGTGAACGCGGTA
Otu00014	Proteobacteria	Proteobacteria_unclassified	Proteobacteria_unclassified	0	0.11	7.8	0	0.01	0	0	GCCTCGACATGGTGTGGCTGGCGCAGCAGGGGCATCGCGTCATCGGCGCGGAGCTGAGCCAACGGGCCATTGACGATTTCTTCGCCGAGCGCGGCCTTGCGCCGACGACGCGAGCGTGCGGCAGCTTCATCGTGAAGTCGGCGGGTCCCTATGAGCTGTGGGGCGGCGATTTCTTCGAACTGCCGCGCGAGGCCGTGGCGGGAGTTGCCGGCGTC
Otu00016	Proteobacteria	Pseudomonas	sp_	0	0.03	0	0	6.6	8.35	3.17	CGCTGGATATGGCCTGGTTGGCAGGTCAGGGTTATCGGGTGTTGGGCGTCGAGCTGGCGGAGAGTGCGGTGATCGCATTCTTTGCCGAGCAGGAGCTGACCCCGGAAATCGATCAGTACGGCGCTTTTCGCCGTTATCGAGCCGGCGCCGTCGAGCTGCTGTGTGGCGACTTCTTCGCGCTGCAAGCTGCCGATGTGGTGGATTGTGCCGGCCTG
Otu00017	Proteobacteria	Gammaproteobacteria_unclassified	Gammaproteobacteria_unclassified	0	0	0	0	2.42	0	23.54	GTCTGGATATGCTGTGGCTGGCAGGGCAGGGCCAGCGGGTATTGGGCGTGGAGTTGTCGCGCAAGGCGGTGGAGGATTTTTTTGTCGAGCATGACCTGGCGCCGAGTGTGATTGAGCGCGGAGCTTTTACGGTCTTTGAAGCGGGTGGTGTCAGTCTCTGGTGTGGCGATTTTTTCGCCCTCGATGCAGCCGATGTGACCGAGTGTGTTGGCCTC
Otu00019	Proteobacteria	Xanthomonas	axonopodis/campestris	0.23	0	1.24	16.04	0	0	0	CGCTGGATCTGCATTGGCTGGCCGCGCAAGGCCACCGCGTGCTCGGTGTGGAGATATCGCCATTGGCCGTCACGCAATTCTTCGATGACGCAGGCCTGCAACCGCAGCGACACACCAGCCGCGCAGGCGAGCACTGTATCGCCGGCCCGATCGAAATCATCTGCGGCGACGCCTTTACGCTGGATGCGAGCGTGCTGGGCGACTGCACCGCCGTC
Otu00024	Proteobacteria	Pseudomonas	chengduensis	0	0	0	20.43	0.01	0	0	GTCTCGACCTGGTCTGGTTGGCGGAGCAGGGGCATGCTGTGATCGGTGTGGAGCTGGCCGAGCGCGCGGTGCAGGATTTCTTCGCTGAGCGCGATGTACAGCCGCAGGTGTCGCAGCACGGGGCATTCAAGGTCTACCAGGCGGGCGCGCTGCGGATTTTGTGCGGCGACTTTTTCGCCTTGAGCCGTGACGAGGTTGCCGAGTGCCGGGCTTTC
Otu00026	Proteobacteria	Pseudomonadaceae_unclassified	Pseudomonadaceae_unclassified	0	0	0	0.01	0	0	0	GCCTGGATCTGGCCTGGTTGGCGGGGCAGGGTTATCACGTCGTCGGTGTTGAGCTGGCGCAGCGTGCAGTGGAAGATTTCTTCGACGAGCATAAGCTGCTGCCGGAGGTCAGTGAGGTCGGCGCGCTCAGGCTGTATCGGGCTGGCGCTGTGGAAATCTACTGCGGTGATTTCTTCGCCCTGACGGCTCAGCAGCTTGCTGGCTGCTCCGCACTG
Otu00027	Proteobacteria	Pseudomonas	Pseudomonas_unclassified	0	0	0	13.51	0.01	0	6.3	GTCTGGACCTGGCCTGGTTGGCGGGGCAGGGCTATCAGGTGGTGGGTGTCGAGCTGGCGCAGCGTGCGGTGGAGGACTTCTTCGCTGAGCATAAGCTGCAGCCGGTGGTCAGCGACGTCGGCGCATTCAGCCTGTATCGGGCGGGCGCCGTGGAGATCTACTGCGGTGATTTCTTCGCCCTGACGGCGCAGCAGCTTGCTGGCTGCGCCGCACTG
Otu00031	Proteobacteria	Gp_BH	Gp_BH	0	2.44	0.02	0	0	0.01	0	CTCTGGATATCGACTGGCTGCTGTCCCGCGGCTATCGCGTGGCTGGCGCTGAGCTGAGTGCGCTGGCGGTTGCGCAACTGTTCGAGCGGCTTGGAGTGACGCCTGCAGTTCGGCGTGCCGGTGCACTGGAATGCTGGAGCGTGGCTGGGCTTGATGTTTTCGTGGGCAATATCTTCGGACTGGTTGCCGCAGAACTCGGCGGCCTGGATGCTGTG
Otu00034	Proteobacteria	Proteobacteria_unclassified	Proteobacteria_unclassified	0	0.01	0	0	0.01	0	0	ACGCGCGATATTGCGTGGCTGTTGCAGGCAGGGTACAGCGTGGTGGGGATCGAGCTCAGCGAGACGGCCATTCAACAGTTAGTCGAGGATCTCGGCACGCACGCCGATGTGGTGGAGCTTGGCCCGCTCAAGCGCTACCACGCGCCGGGGCTCGAGCTGTTCGTGGGTGACATCTTTGACCTTAGCGCAGGGCTATTGGGCCATGTCGATGCCGTC
Otu00035	Proteobacteria	Nitrosomonas	oligotropha	0	1.5	0.15	0	0.01	0.01	0	GTCATGATATGCTTTGGCTGCGTCAACAGGGACATGCTGTGCGGGGTGTTGAGTTCAGCACTACAGCGGCGCAGGCATTTTTCAGCGAAAACGGTTTGACACCGCAGAGCCGTGCGCACGGCCGGTTCATGCACTGGGAAGCGAATGACATTGCTATTTTATGCGGCGATTTTTTCGATTTAAGCGCACAAGATATGCGCAATGTCAGCGCCGTA
Otu00037	Proteobacteria	Proteobacteria_unclassified	Proteobacteria_unclassified	0	0.03	3.11	0	0.17	0	0	CGCTGGATATCGACTGGCTGCTGTCCCGCGGCTACCGCGTGGCCGGCGCAGAGCTCAGTTCGCTGGCCGTCGCACAACTGTTCGAGCGCCTCGCAGTGACGCCTGCCGTGCGGCGCGTCGGTGCGCTGGAATGCCACAGCGCTGCGGGACTCGATGTTTTCGTTGGCGACATCTTCAACCTTGCTGCCGAAGCACTGGGCGCCGTGGATGCCGTC
Otu00039	Proteobacteria	Proteobacteria_unclassified	Proteobacteria_unclassified	0.76	0	0.12	0	0.07	0	0.01	GCGTGGATCTGCGCTGGCTGGCCGACCGGGGTGCGCACGTTCTGGGCGTAGAACTGAGTCTAATCGCGGTGGAGAGTTTTTTCGCCGAGCAGGGATTGACGCCCAGAACCCGCAAAGCCGGGGCATTCACGGTATGGGAGAGCGGGCCGATCCATCTCCTGTGTGGCGACTACTTCGCGCTCGCACCCGCGGACCTCGCCGGCGTGCATGCCGTGT
Otu00042	Gp_DE/Proteobacteria	unknown	unknown	0.55	0.09	0.36	0	0	0	0.01	CGCTGGATATTCCTTGGCTGCTTTCCAACGGCTATCGTGTCGCAGGAGCTGAATTGAGCCCAATCGCCATTAAGGACCTGTTTGCACAGCTGGGCGTGAAACCCACGATCACAAGAAACGGTGGAACGGACCATTACCGTGCGACCGATATCGACGTCTTTGTGGGCGACATTTTCGACGTCACGATGAAGATGCTTGGCCCTGTCGATGCGATT
Otu00043	Proteobacteria	Gp_DC2	Gp_DC2	0	0.07	2.57	0	0.15	0	0	CGCTGGATATCGACTGGCTGCTGTCCCGCGGCTACCGCGTGGCCGGCGCTGAGCTCAGTTCGCTGGCCGTCGCACAACTGTTCGAGCGCCTCGCAGTGACGCCTGCCGTGCGGCGCGCCGGTGCGCTGGAATGCCACAGCGCTGCGGGACTTGATGTTTTTGTTGGCGACATCTTCAACCTTGCTGCCGAAGCACTGGGCGCCGTGGATGCCGTC
Otu00044	Proteobacteria	Pseudomonas	Pseudomonas_unclassified	0.19	0.01	0.06	3.16	0.03	0	0	GCCTGGACCTGATGTGGTTGGCCAGTCATGGGCTGCGGGTGATGGGGGTGGAGCTGTCGGAGCAGGCCGTGGAGGCGTTTTTCAGCGAACAGAACCTTGTGCCACGTATCACTCGGCGGGATGCCTTTACGGTGTACCAGACTGATCTGATCGAAGTGTGGTGCGGCGACTTCTTCGCTCTGGACGCCGAAGCCTTGGCCGGTTGCACCGCATTA
Otu00045	Proteobacteria	Gammaproteobacteria_unclassified	Gammaproteobacteria_unclassified	0.59	0	0.1	0	0.02	0	0	GCCTGGATCTGCTCTGGCTGGCGGGCCAGGGCCATCGGGTGCTGGGTGTGGAGCTATCGGCCCAGGCGGTGAAGAGCCTGTTCAGCGAAAATGGGCTTGCGCCTGAAGTGACCCGCCAAGGTGCATTCGAGGTGTGGCGCAGTGGTGAGCTTGAGGTGTGGTGCGGGGATATTTTTGCGCTGCGTGCGCAGGATGTGGCCGGCTGCACTGCACTG
Otu00046	Proteobacteria	Pseudomonas	fragi	0.61	0	0	0	0.01	0	0	GCCTGGATATGAGCTGGTTGGCGGCCAACGGCCATGAAGTGCTGGGGGTGGAGCTGACGCAGACGGCCGTGGAACAGTTTTTCAGCGAGCAGCAGGTCGAGCCACAGATTCGCCAGCAGGGCGCCTTCAAGGTGTACGAGGCAGGCCCGGTGACGATCCTGTGCGGTGATGTGTTCGCCCTGACTGAGGCCGACGTGGCCTCCTGTGTGGGGCTG
Otu00049	Proteobacteria	Pseudomonas	Gp_CX/sihuiensis	0.36	0.02	0	0	0	0	2.6	GTCTCGACCTGGTCTGGTTGGCGGAGCAGGGGCATGCCGTGATCGGTGTGGAGCTGGCCGAGCGCGCGGTGCAGGATTTCTTCGCTGAGCGTGATGTACAGCCACAGGTGTCGCAGCACGGGGCGTTCACGGTCTACCAGGCGGGCACGCTGCGGATTTTGTGCGGCGACTTTTTCGCCTTGAGTCGTGACGACGTTGCCGGGTGCCGGGCTTTC
Otu00054	Bacteria_unclassified	Bacteria_unclassified	Bacteria_unclassified	0	1.13	0.35	0	0.01	0	0	CCCTCGACATCGACTGGCTGCTTGCGCGCGGCCACCGCGTGGCTGGTATCGAGCTCAGCGCACTGGCGGTGGCGCAGCTGTTTGAGCGCCACGGAGCCGCGCCATCCATCACTCGCGTCGGAGCGCTGGAGCGCCACAGCATCGACCGGCTTGACGTGTTTGTGGGTGACTTCTTCCATCTGTCGGCCGCAATGCTGGGTGATGTGGATGCCGTG
Otu00057	Bacteria_unclassified	Bacteria_unclassified	Bacteria_unclassified	0.07	0.05	0.11	0	0	0	0.01	CGCGAGACATTGCCTGGCTGCTCGACGAAGGCTATCGCGTCACTGGCGCCGAGCTGAGTGAGCTGGCGATCAAGGCCTTGTTCGAAGAGCTTGGTCTGGTGCCGGAGATTACCAACACCGACAAGCACGTGTGCTATCAGTCCAGGAATCTCCGCATCTTTGTCGGCGATATTTTTGATGTGTCTGCGAAGCAGCTCGGCCCGATCGACGCGATC
Otu00065	Bacteria_unclassified	Bacteria_unclassified	Bacteria_unclassified	0.31	0.17	0	0.01	0	0	0	CGCGAGACATTGCCTGGCTTCTCGACGAAGGCTATCGAGTCACTGGTGCCGAGCTGAGTGAACTGGCGATCAAGGCGTTGTTCGAAGAGCTTGGTCTGGTGCCGGAGATTACCAACACCGACAAACACGTGTGCTATCAGTCCAGGAATCTCCGCATCTTTGTCGGCGACATTTTTGACGTGTCGGCGAAGCTGATCGGTCCAATCGACGCGATC
Otu00066	Proteobacteria	Pseudomonas	aeruginosa	0.42	0	0	0	0	0	0.17	CCCTGGACCTGGCCTGGCTGGCCGCCCAGGGACTGGAGGTGCTGGGGGTGGAGCTTTCGGAAAAGGCCGTGAGCGACTTCTTCGAGGAGCACGACCTGCGCCCCGAGATCGATCAACTGGATGGTTTCCGCCGCTACCGGGTCGCCGGCATCACCCTGCTGCAGGGTGATTTCTTCGCCTTGCAGGCAGAGCACCTGGCGCAGTGCAGGGCGTTC
Otu00070	Gp_DE/Proteobacteria	unknown	unknown	0.28	0.25	0.09	0	0	0.01	0	CGCTGGATATTCCTTGGCTGCTTTCCAACGGCTATCGTGTCGCGGGAGCTGAATTGAGCCCAATCGCCATTAAGGACCTGTTTGCACAGCTGGGCGTGAAACCCACGATCACAAGAAACGGTGGAACGGATCATTACCGTGTGACCGATATCGACGTCTTTGTGGGCGACATTTTCGACGTCACGATGAAGATGCTTGGCCCCGTCGATGCGATT
Otu00072	Proteobacteria	Stenotrophomonas	acidaminiphila	0.09	0.28	0	0	0.03	0	0	GCCTGGACATGCATTGGCTGGCCGCGCAGGGCTACCGCGTGCTCGGCGTCGAGCTCTCGCCGCTGGCGGTGCAGCAGTTCTTCGACGAGGCCGGGCTGCGGCCCGAACGCCGCAGCAGCGCGCTGGGCGAGCATTTCAGCGCCGGACCGATCGAGATCCTCCTCGGCGACGCCTTCACCCTCGACGACCAGACCCTGGCCGGCATCGCCGGGCTC
Otu00079	Proteobacteria	Proteobacteria_unclassified	Proteobacteria_unclassified	0.34	0	0	0	0.04	0.01	0	CCGAGGATCTGGTGTTCCTCGCCTCGAAGGGCCACACGGTGATCGGTGTCGAGCTGGTCGAGGATGCGGTGAAGGCGTTCTTCGCCGAGCACGACCTCGCGCCGAAGATCACGAGTCACGCGCATCACGTCGAGTACACGTCCGGACCGATCTCGTTGTTCGCGGGCGACTACTTCACGACGTCGCCGGCGCTGCTCGGCGCTTGCGATGCGCTC
Otu00082	Proteobacteria	Pseudomonas	Pseudomonas_unclassified	0.06	0.08	0.9	0	0.04	0	0.02	GCCTGGATTTGTTGTGGCTCGCCCGCGAAGGCCATGAGGTGTTGGGCATCGAGTTGTCGGAGAAGGCCATCGAGGACTTCTTCAATGAGCACCATTTCGACCCTGATGTCAGTGAGCAGGGCCCGTTCAAGGTCTATCGGGCTGGCTCGATCGAGCTGTGGTGCGGTGACTTTTTCGACCTGACGGCTGGTGATGTGGCCGATTGCGCCGCTGTT
Otu00085	Proteobacteria	Proteobacteria_unclassified	Proteobacteria_unclassified	0.04	0	0	0	4.87	0	0	GCGTGGATCTACGCTGGCTGGCCGACCAGAGCGCGCACGTTCTGGGCGTAGAACTGAGTCTAATCGCGGTGGAGAGTTTTTTCGCCGAGCAGGGATTGACGCCCAGAACCCGCAAAGAGGGGGCATTCACGGTATGGGAGAGCGGGCCGATCCGGCTGCTGTGTGGTGACTACTTCGCGCTCGCTCCCAAGGACCTCGCTGGCGTGCATGCAGTG
Otu00095	Proteobacteria	Proteobacteria_unclassified	Proteobacteria_unclassified	0.28	0	0.04	0	0	0.01	0	CGCGAGACATTGCGTGGCTGCGCGACGAAGGCTATCGTGTCACTGGCGCGGAGCTGAGTGAACTGGCTATCAAGGCACTGTTCGACGAGCTTGGTGTCGTGCCCGAGATTACCAATGTCGGCCAACACTTGTGTTATCAGTCCCGCAACATTCGCATATTTGTTGGCGATATTTTTGACTTGTCGGCGAAGCTTCTCGGGCCCATCGACGCCATC
Otu00107	Proteobacteria	Pseudomonas	Pseudomonas_unclassified	0.04	0	0	0	1.8	0	2.09	GCCTGGATCTGGCTTGGTTGGCGGGGCAGGGTTATCACGTCGTCGGTGTTGAGCTGGCGCAGCGTGCAGTGGAAGATTTCTTCGACGAGCATAAGCTGCTGCCGGAGGTCAGTGAGGTCGGCGCGCTCAGGCTGTATCGGGCTGGCGCTGTAGAAATCTACTGCGGTGATTTCTTTGCCCTGACGGCGCAGCAGCTTGCTGGCTGCTCCGCACTG
Otu00114	Proteobacteria	Pseudomonas	sp_	0	0.41	0	0.01	0	0	0	CGCTGGATATGGCCTGGCTGGCGGGCCAGGGCTATCGGGTGCTGGGCGTTGAGCTGGCGGAGAGTGCGGTGATCGCGTTTTTTGCCGAGCAGGAGCTGACCCCGGAGGTCGATCAGTACGGCGCTTTTCGCCGTTATCGGGCCGGCGCCGTCGAGCTTCTGTGCGGCGATTTCTTCGCGCTGCAAACTGCCGATGTGGCGGATTGTTCTGGCCTG
Otu00119	Proteobacteria	Pseudomonas	stutzeri	0.06	0	0	3.06	0	0	0	GCCTGGACCTGGCCTGGCTTGCAGGGCAGGGCCATCGCGTACTGGGGGTGGAGCTGAGCCAGAAAGCCGTCGAGGCGTTTTTCGCCGAGCAAGGTCTGGAGGCGGAGATTTCGCAGGTCGGCGCATTCAAAGTCTATCGATCCGGCAGGCTTGAGATCCGTTGTGGCGATTTCTTTGCGCTGGCGGCGCAAGACGTTGCCGACTGCCGGGGCGTT
Otu00125	Proteobacteria	Proteobacteria_unclassified	Proteobacteria_unclassified	0	0	0.88	0	0.03	0	0	GCCTTGATCTGCTGTGGCTGGCCGGGCAGGGGCATCAGGTGGCAGGCATCGAGCTGAGCCCAATTGCCGTGCGCGCTTTTTTTCGCGAAAACCGCCTGCATCCGGTCCGGCGCCAGGTGGGGCGGCTGACCGAGTGGTCGAGCGGGCAGATCAGAATTTTTTGTGGCGACATCTTCGCCCTGACCGCCGCCGATCTTGGCCCTGTTAACGCCGTA
Otu00132	Proteobacteria	Pseudomonas	Pseudomonas_unclassified	0.06	0.18	0	0.01	0.02	0	0	GTCTCGACCTGGTCTGGTTGGCGGAGCAGGGGCATGCCGTGATCGGAGTGGAGCTGGCCGAGCGCGCGGTGCAGGATTTCTTCGTTGAGCGTGATATGCAGCCACAGGTGTCGCAGCACGGGGCGTTCAAGGTCTACCAGGCGGGCGCGCTGCGGATTTTGTGCGGCGACTTTTTCGCCTTGAGTCGTGACGACGTTGCCGGGTGCCGGGCTTTC
Otu00134	Proteobacteria	Gammaproteobacteria_unclassified	Gammaproteobacteria_unclassified	0	0	0	3.67	0	0	0	GTCTGGACCTGATGTGGCTGGGGGGGCAGGGCTTGCGGGTGCTCGGCGTGGAACTGATAGAGCAGGCGGTGCAAGACTTCTTCAGCGAACAGCAGCTTCAACCGCAGGTGCGCGAGCATGGCGCGTTTCGTATTTATCAGGCCGGCAACCTTGAGTTGTGGTGCGGCGACATCCTCGCCCTGACCACCGACGACGTGCGCGACTGCACCGCCCTG
Otu00138	Proteobacteria	Proteobacteria_unclassified	Proteobacteria_unclassified	0	0	0	0	0.01	0	0	ACGCGCGACATTGCATGGCTGTTGCAGGCAGGGTACAGCGTGGTGGGAATCGAGCTCAGCGAGACGGCCATTCAACAGTTAGTCGAGGATCTCGGTACGCACGCCGACGTGGTGGAACTCGGCCCGCTCAAGCGCTACCACGCGCCAGGGCTCGAGCTGTTCGTGGGTGACATCTTTGACCTTAGCGCAGGGCTATTGGGCCATGTCGATGCCGTC
Otu00147	Proteobacteria	Gammaproteobacteria_unclassified	Gammaproteobacteria_unclassified	0	0.21	0	0	0.01	0	0	GCCTGGATCTGCGCTGGCTGCGCGAGCAGGGCTACCGGGTACTGGGCGTCGAGCTGTCGCGCAAGGCGGTGGAAGACTTCTTTGCCGAGCAGGGGCTCGCATATACGCAGACGGAACAGGGCGCTTTCAGCTGCTACCGGGCGGACGGACTGGAGCTCTGGTGTGGCGACTTCTTCGCCCTGGCGGCCGCGGATGTGGCGGATTGCCAGGGGCTT
Otu00165	Proteobacteria	Proteobacteria_unclassified	Proteobacteria_unclassified	0.16	0	0.01	0	0.19	0	0.01	GCCTCGATATGGTGTGGCTGGCGGGGCAGGGACACGAAGTTGTCGGCGCCGAGCTTTCGGATGTGGCGCTGAAGGACTTCATCGCCGAACAGTACCTTACCTACGTGACGACGGAAGAAGCGGACGGCTTCACGACCTATTCGTCGGGCCCGTTTGAACTGTGGTGCGGGGACTACTTTTCGTTGAAGAAGGACGAGGTCGCGGCTTCTGCCGCCTAC
Otu00167	Proteobacteria	Pseudomonas	Pseudomonas_unclassified	0	0	0	0	0.52	0	2.5	GTGTCGACATGATCTGGCTGGTCAGTCAGGGGTATCGGGTGGTGGGTGTTGAGTTGGCGCGCCAGGCGGTCGAGGATTTCTTTCATGAGCAGCAATTGCAGCCGCAGATCAGCGAGGAAGGAGCGTTCGCGGTATATCGCGCCGGGGCGGTGGAGATTTATTGCGGTGATTTCTTTGCCCTGACCGCGCAGCAGCTGCAAGGCTGTCAGGCCCTG
Otu00197	Proteobacteria	Pseudomonas	pseudoalcaligenes	0.07	0.04	0	0.01	0	0	0	GTCTCGACCTGGTCTGGTTGGCGGAGCAGGGGCATGCCGTGATCGGTGTGGAGCTGGCCGAGCGCGCGGTGCAGGATTTCTTCGTTGAGCGTGATATGCAGCCACAGGTGTCGCAGCACGGGGTGTTCAAGGTCTACCAGGCGGGCACGCTGCGGATTTTGTGCGGCGACTTTTTCGCCTTGAGTCGTGACGACGTTGCCGGGTGCCGGGCTTTC
Otu00204	Proteobacteria	Pseudomonas	viridiflava	0.06	0	0.3	0	0.07	0	0	GCCATGACATGAGCTGGCTGGTCGAGCAGGGCTTCCAGGTGGTCGGCGTCGAGCTGTCGCAGACGGCGGTGGAGGGCTATTTTGCGGAGCACCGGCTTGAGCTGCAGGTGACGCAACGTGGAGGCTTCACGCTGTACTCGGCACCTGGTATCGAGATCTGGTGTGGTGATTTCTTTGCGCTGACGGCTGAAGACATCGGTGTGTGCACAGCATTT
Otu00205	Gp_DC1	Gp_DC1	Gp_DC1	0	0.34	0.02	0	0.01	0	0	CGCTGGATATCGACTGGCTGCTGTCTCGCGGTTATCGCGTGGCTGGCGCAGAGCTGAGTCCAATGGCGGTTGCGCAACTGTTCGAGCGGCTCGGTGTTACGCCAGAGGTTCGGCGTGCTGGCGCGCTGGAATGCTGGAGTGCTGCCGGGGTGGATGTATTCGTGGGCGATATATTCAAGCTGTCTGCTGCAGAGCTCGGCGGCGTGGATGCCGTG
Otu00207	Proteobacteria	Gammaproteobacteria_unclassified	Gammaproteobacteria_unclassified	0	0	0	0	0	2.43	0	GCCTGGATATGGCCTGGCTGGCTGGGCAGGGCTATCAGGTGATCGGTATTGAGTTGGCGCAGCGCGCAGTGGAGGACTTTTTTGCTGAGCATGGGCTTGAGCCGCAGATCAGTCAGGATGGCGTGTTCCAGGTCTACCGGGCCGGTGCAGTGACGATTTACTGCGGAGATTTGTTTGCCTTGGAGCCTCGGCATGTGGCGCAGTGCAGCGCGTTG
Otu00211	Proteobacteria	Pseudomonas	Pseudomonas_unclassified	0.03	0	0	0	0.01	0	0	GCCTGGACCTGGCCTGGCTGGCGGGGCAGGGGCTGCGGGTATTGGGCGTGGAGTTGTCGCTGCGGGCGGTGGAGGACTTTTTCGCCGAACAGCAACTGCAACCGGAGCGTTACGAGCACGGCGCCTTTACCTGCTATCGCAGTGAGGGCGTGGAGATCTGGTGCGGTGATTTCTTTCAGCTGACCGCCGAGGACGTAGCCGACTGTGTCGGCCTG
Otu00214	Gp_CJ3	Gp_CJ3	Gp_CJ3	0.13	0	0.03	0	0.02	0	0	CGCTCGATATCCATTGGTTGCTGTCCAAGGGCTATCGGGTCGTGGGCGCGGAGTTGAGCAGTCTTGCTGTCGATCAGCTATTTGCCGAACTCGGAGTCGAGCCCACGGTGTCCAGCTGCGGCCTCACCGAGCGATATAGCGCACACAATCTGGACATCCTGGTGGGCGACATCTTCGACGTGTCGACCCAGTTACTTGGCCAGGTCGATGCCATC
Otu00231	Proteobacteria	Gammaproteobacteria_unclassified	Gammaproteobacteria_unclassified	0	0	0	0	0.01	0	2.11	GTCTGGATATGCTGTGGCTGGCAGGGCAGGGCCAGCGGGTATTGGGCGTGGAGTTGTCGCGCAAGGCGGTGGAGGATTTTTTTGCCGAGCACGAGCTAACACCGGGCGTGACTGAGCGCGGAGCTTTTACGGTCTTTGAAGCGGGTGCTATCAGTCTGTGGTGTGGTGACTTTTTCGCCCTCGATGCAGCCGATGTGACCGAGTGTGTTGGCCTC
Otu00259	Proteobacteria	Gp_CJ1	Gp_CJ1	0.02	0.13	0.04	0	0	0.01	0	CGCGTGACATCGCCTGGTTGCTGAAGAGTGACTATCAGGTGGTGGGCGCCGAGTTGAGTGAAGCGGCGGTGCAGCAGCTGTTCGGTGAGCTCGGAGCAGAGCCACTCATCACCCAATGCGGTTGGCTGCAACGGTATGAAGCGCCAGGGCTCACTATTTTCGCTGGCGATATCTTTGAACTGACACCCGAGCTGCTGGGACATGTCGATGGCATC
Otu00272	Proteobacteria	Pseudomonas	Pseudomonas_unclassified	0.1	0	0	0	0.01	0	0	GCCTGGACCTTGCCTGGCTGGCGGGGCAGGGCTATCAGGTGGTGGGTGTCGAGCTGGCGCAGCGTGCGGTGGAGGACTTCTTCGCTGAGCATAAGCTGCAGCCGGTGGTCAGCGAAGTGGGTGCTTTCAGGCTTTATCGGGCTGGCACTGTGGAGATCTACTGCGGTGATTTCTTTGCCCTGACGGCGCAGCAGCTTGCCGGCTGTATCGCACTG
Otu00298	Proteobacteria	Proteobacteria_unclassified	Proteobacteria_unclassified	0.09	0	0	0	0.1	0	0	CGCGCGATGCTGCCTGGTTGCTCGCCCGCGGGTGTCGGGTGATTGGCGTGGAGTTGAGCGAAATTGCCATTATCGAACTATTTGCAGAACTTGGCTTGCAGCCGGCACTCTCCAAAGCCGGGACCTTGACCCGCTACAGCAATAGGGATATCGACATACTGGTGGGCGACATTTTCGATGTCACTGCTGAATTTCTCGGGCCTGTAGACTCGATA
Otu00303	Proteobacteria	Pseudomonas	Pseudomonas_unclassified	0	0.04	0.02	0	0.01	0	0	GCCTGGATCTGGCTTGGTTGGTGGGGCAGGGTTATCAGGTGGTGGGGGTAGAGCTGGCACCGCGTGCGGTCGAGGATTTCTTCACGGAGCATGGGCTGCAACCGCAGGTCAGTGATGTCGGAGTATTTCGGCATTACCAAGTGGGTAGCCTGGAGATCTATTGCGGGGACTTCTTTGCCCTCAGCGCGCAGCAACTGGACGGTTGCACCGCTCTG
Otu00312	Proteobacteria	Proteobacteria_unclassified	Proteobacteria_unclassified	0	0	0	0	0	1.57	0	CCCGGGACTTTGCCTGGCTGCTTGCCTGCGGTTATCGCGTTGCTGGTGCAGAATTGAGCGAACTCGCCATCGTCGAGTTGTTTAACGAACTTGGCCTGGAGCCGGAAATCTCCAGCGCCGGAAAGTTACTGCGCTACAGCGCCACGAATATCGACATCTGGGTGGGCGATATTTTTGATGTCTCTGCGGAAAATCTCGGGCCGGTGAACGCGGTA
Otu00327	Proteobacteria	Proteobacteria_unclassified	Proteobacteria_unclassified	0.01	0	0	0	1.33	0	0	GCGTGGATCTACGCTGGCTGGCCGACCAGAGCGCGCACGTTCTGGGCGTAGAACTGAGTCTAATCGCGGTGGAGAGTTTTTTCGCCGAGCAGGGATTGACGCCCAGAACCCGCAAAGAGGGGGCATTCACGGTATGGGAGAGCGGGCCGATCCGGCTGCTGTGTGGTGACTACTTCGCGCTCGCTCCCAAGGACCTCGCTGGCGTGCATGCAGTG
Otu00331	Proteobacteria	Proteobacteria_unclassified	Proteobacteria_unclassified	0.02	0	0	0	1.19	0	0	GCCTGGACCTGATGTGGCTGGCGGGGCAGGGCTTGCGGGTGCTTGGCGTGGAGTTGATCGAGCAGGCCGTGCGAGACTTCTTCAGCGAACAACAGCTACAACCGCAAGTGCGTGAGCATGGTGCGTTTCGCATCTACCAGTCCGGGAATGTAGAGCTGTGGTGCGGCGACATCTTCGCCCTGACCGCCGACGACGTGCGCGACTGCACCGCCCTC
Otu00341	Proteobacteria	Proteobacteria_unclassified	Proteobacteria_unclassified	0	0	0	1.47	0	0	0	CCGAGGACCTGGCGTTTCTCGCCTCGCGCGGCCACGAGGTGATCGGCGTCGAGCTGATCGAGTCCGCGGTCCGGGCGTTCTTCGACGAGCACGGCATCGCACCGACCGTGACCCCGCGCGGCAAGCTGATCGCGTACGCATCGCAACCGATCACGATCTACGCCGGCGACATCTTCGAGGTCATGCGCGACGTCGTCGGACCGATCGACGCGATC
Otu00343	Bacteria_unclassified	Bacteria_unclassified	Bacteria_unclassified	0.08	0	0	0	0.01	0	0	CACGCGATATCGCGTGGCTGCTCTCCGGTGGCTACCGCGTCGTCGGCGCGGAATTGAGCACTCTCGCTATCGAGCAGTTGTTCGCTGAGCTTAACGTGGAACCGGAGATTGCGAAAGTTGGAAAACTGGTCCGCTACAACGCCAGCGGCATCGACATTCTCGTTGGCGATGTGTTCGATGTGACCGCCACCGCGCTTGGGCCGGTGGACGCAGTC
Otu00355	Bacteria_unclassified	Bacteria_unclassified	Bacteria_unclassified	0.07	0	0.04	0	0.05	0.01	0	CGCTGGATATTGCGTGGCTGTTGTCTCATGGTTATCGTGTGGCCGGCGCGGAGTTAAGTGAATTGGCCATTGGCCAATTGTTTGAAGGGCTCGGGTTAAAGCCGGAGAAATCTAACGTCGGCAAGGTCCATCATTATAGCGCAAAGAATATCGACATATTCGTCGGCAATATCTTTGACCTATCCATAGAAATGCTTGGGGCTGTGGATGCCATC
Otu00370	Proteobacteria	Proteobacteria_unclassified	Proteobacteria_unclassified	0	0.01	0.06	0.01	0.02	0	0	CGCGCGATATCTGGTGGCTGCTGGAGTCCGGCTATCGGGTGGTCGGCGTTGAGTTGAGCCGGATGGCCGTCGATCAGCTATTTGCGGAGATGGATCTGCAACCGGCCATTTCCCAGGCCGGCCCGCTGACCCGCTTTGCCGTTGAAGATATCGACATCTACTGCGGCGATATCTTCGAACTGACCGACAGCGAGCTGGGGCCGATCGACGCGATC
Otu00377	Proteobacteria	Proteobacteria_unclassified	Proteobacteria_unclassified	0	0.03	0.02	0	0.03	0	0	CGCGCGATATCTGGTGGCTGCTGGAATCCGGCTATCGGGTGGTCGGTGTTGAGTTGAGCCGGATGGCCGTCGATCAGCTATTTGCATAGATGGATCTGCAACCGGCGATTTCCCAGGCCGGCGCGCTGACCCGTTTTGCTGTCGAAGATGTCGACATCTACTGCGGCGATTTCTTCGAACTGACCGACAGCGAGCTTGGCCTGATCGACGCGATC
Otu00378	Proteobacteria	Proteobacteria_unclassified	Proteobacteria_unclassified	0.05	0	0.01	0	0.32	0	0	GTCTGGATCTGGTGTGGCTGGCGGGGCAGGGGTATCGCGTGCTTGGGGTCGAGTTGGTGGAGCAGGCGGTGCAAGACTTTTTCCGCGAGCAGGCGCTGCAACCGGACGTGCATGAGCACGGCGCGTTCCGCATCTATCAAACGGGCAATCTGCAGCTGTGGTGCGGCGACATCTTCGCCCTGACGGCTGACGATGTACGCGAATGCACCGCGCTG
Otu00420	Proteobacteria	Proteobacteria_unclassified	Proteobacteria_unclassified	0	0	0.16	0	0.44	0	0.01	GCCTCGACATGGTCTGGCTGCGGGAGCGGGGACACGCCGTCGTCGGCGTCGATCTCTCGCCGCTTGCCGCGCGGGATTTTTTCCGTGAGCGTGGCCTGGTGCCGCAGATCGAATCCTGCGGGAGCCTGCAGCGATGGACTGGCGGCGGATATGAGTTCTGGCTTGGCGATCTGTTCGCCGTCACAGCCCGGGACATCGGCAGCATCGATGCGCTC
Otu00425	Proteobacteria	Pseudomonas	sp_	0	0	0	0	0.41	0	0.73	CGCTGGATATGGCCTGGTTGGCAGGTCAGGGTTATCGGGTGCTGGGCGTCGAGCTGGCGGAGAGTGCGGTGATCGCATTCTTTGCCGAGCAGGAGCTGACCCCGGAAATCGATCAGTACGGCGCTTTTCGCCGTTATCGAGCCGGCGGAGTCGAGCTGCTGTGTGGCGACTTCTTCGCGCTGCAAGCTGCCGATGTGGCGGATTGTGCCGGCCTG
Otu00455	Proteobacteria	Gp_DD2	Gp_DD2	0	0.16	0	0.01	0	0	0	CGCGGGATATCTCTTGGCTGCTTACCCATGGCTATCGCGTGGCCGGCGCGGAATTGAGCAAGATCGCCATAGAGCAATTATTCGCCGAGCTGGGGGTGACGCCGGCGATATCGCAAGCAGGTGCCATGACCCACTATAGCGCGGAAGATCTGGATATCTTCGTCGGTGACATTTTTGATTTATCCGGCGACGTGCTGGGGCCGGTTGATGCCATC
Otu00456	Proteobacteria	Gammaproteobacteria_unclassified	Gammaproteobacteria_unclassified	0.05	0	0	0	0.09	0	0.01	GCAACGACTTGGCGTGGTTGGCCGCGCAAGGACATGAGGTGGTGGGCGTTGAGCTGAGCGCTGTGGCAGCCCAGGCATTTTTTGAAGAACACGGGCTACAAGCCACGCAGCATGACGACAGTGCCTTCAAACGCTTTGCATCAAACCAAGTCGACATCCTGAGCGGTGACTTCTTCGCGCTCACGCCAGCGTTGCTCGGCGATGTGGATGGCTT
Otu00471	Proteobacteria	Proteobacteria_unclassified	Proteobacteria_unclassified	0.06	0	0	0	0.01	0	0	GCCTGGATCTGGTGTGGCTGGCGGGGCAGGGGTATCGCGTGCTTGGGGTCGAGTTGGTGGAGCAGGCGGTGCAAGACTTTTTCCGCGAGCAGGCGCTGGAACCGGACGTGCATGAGCACGGCGCGTTCCGCATCTATCAAGCGGGCAATCTGCAGCTGTGGTGCGGCGACATCTTCGCCCTGACGGCTGACGATGTAAGCGAATGCACCGCGCTG
Otu00483	Proteobacteria	Proteobacteria_unclassified	Proteobacteria_unclassified	0	0.12	0	0	0	0	0.01	GCCTCGACATGGTGTGGCTGGCGCAGCAGGGGCATCGCGTCATCGGCGCGGAGCTGAGCCAACGGGCCCTTGACGATTTCTTCGCCGAGCGCGGCCTTGCGCCGACGACGCGAGCGTGCGGCAGCTTCATCGTGAAGTCGGCGGGTCCCTATGAGCTGTGGGGCGGCGATTTCTTCGAACTGCCGCGCGAGGCCGTGGCGGGAGTTGCCGGCGTC
Otu00484	Proteobacteria	Proteobacteria_unclassified	Proteobacteria_unclassified	0.05	0	0.02	0	0.03	0	0	CGCTGGACATGGTCTGGTTGCGGGAGCGCGGCCACACGGTCGTGGGCGTCGACTTGTCGACGGTCGCTGCCGAGGAGTTTTTTCGTGAGCGTGCGCTGCATCCGCAGGTCGCGTGTGTGGGGTCCTTCGATCGCTGGAGCGGCGGCGGGTACGAGATCTGGGTTGGAGACTTTTTTGATCTGCGTTCGTCCGATCTCGGAACCGTCGATGCGGTG
Otu00487	Proteobacteria	Proteobacteria_unclassified	Proteobacteria_unclassified	0	0	0.13	0.01	0	0	0	CCCTCGACATCCACTGGCTGCTGGGCAACGGCTACCGGGTCGTGGGGGCCGAGCTGAGCCAACTCGCCGTCGAACAACTGTTCGCCGAACTGGGCGCCGAGCCTACGGTCTCCCGTTGCGGCCCCGTCGAGCGTTATGGCGCACCCGGCCTCGACGTCTTCGTCGGCGACATCTTCGAGGTTTCGGCCCAACTGCTGGGCCAAGTCGACGCCATC
Otu00501	Proteobacteria	Xanthobacter	autotrophicus	0.04	0	0	0	0.06	0	0.02	CGCGGGACATCGCCTACCTGCTCGGCCAGGGCTTCGCCGTGGCCGGCGCGGAACTGAGCCGCATCGCGGTGGAGGAATTGTTCGCCGAGCTGGAGGTGGCGCCTGAGATCACCGAAGCCGGCGAATTGCTACGGTTCAGCGCGCCCGGCCTCGACATCTTCCAGGGCGACATCTTCGCCCTCGAAGCCGAGACGCTCGGGCCGGTGGATGCCGTC
Otu00519*	Proteobacteria	Proteobacteria_unclassified	Proteobacteria_unclassified	0.04	0	0	0	0.12	0	0	CCCTCGACATGGCCTGGCTCGCGGACCGCGGCCACCGTGTCGTCGGCAGCGAACTGAGCTCGATCGCCATCCGTGATTTCTTCGCCGCCGGTGGCCTCGATGAGCACCAGGCGACCGAGGGCGATTACATCCGCCACACGGCCGGCGCGTTCGAGATCCTCGAGGGCGATGCGCTCGCGCTCACGCCGCAGCTGACAGGTTCGCTCGACGCGTT
Otu00557	Proteobacteria	Proteobacteria_unclassified	Proteobacteria_unclassified	0.03	0	0.01	0	0.27	0	0.01	CCCTGGACATCGACTGGTTGCTGTCGCGTGGGCATGGTGTGGTGGGCGCGGAACTGAGTTCCCTGGCGGTTACGCAACTGTTCGAGCGTCTGGGCGTTGTGCCCGCCGTCGAGCGCACAGGCAAGCTGGAGCGTCACAGCGCCAAGGGGCTGGATATCTTCGTTGGCGATTTCCTGGATCTGACTCCGGAAGCGCTGGGCAGCGTGGACGGTGTC
Otu00579	Proteobacteria	Gp_DC2	Gp_DC2	0	0.04	0.13	0	0.01	0	0	CGCTGGATATCGACTGGCTGCTGTCCCGCGGCTACCGCGTGGCCGGCGCAGAGCTCAGTTCGCTGGCCGTCGCACAACTGTTCGAGCGCCTCGCAGTGACGCCCGCCGTGCGGCGCGCCGGTGCGCTGGAATGCCACAGCGCTGCGGGACTAGATATTTTCGTTGGCGACATCTTCAACCTTGCTGCCGAAGCACTGGGCGCCGTGGATGCCGTC
Otu00581	Proteobacteria	Pseudomonas	Pseudomonas_unclassified	0.04	0	0	0.04	0.03	0	0	GCCTGGACCTGATCTGGCTAGCTTCGCAGGGCTTGCGCGTGATGGGCGTCGAGCTGGTGCAGCAGGCGGTGGAGGATTTCTTCCGTGAGCAGCAGTTGGAGCCGCAGGTTCGTCAGCAGGGCGCTTTCACCGTGTACCAGGCCGATGCCGTGGAAATCTGGTGCGGCGATATCTTTGCCCTGACGGCTGACGATGTTCGTGAATGCACGGCGCTC
Otu00601	Gp_CJ4	Gp_CJ4	Gp_CJ4	0.01	0.08	0	0	0.09	0	0	CGCGGGATATTGCCTGGTTGCTTTCCCAGGGCTATCGCGTCGTCGGCGCGGAGTTGAGCAAGATTGCCATTGATCAATTATTCGCTGAGCTTGGCGTGACGCCGGCGATATCGCACGAGGGTGCGTCGGTCCACTACAGCGTGGAAGATTTGGACATCTTCGTCGGCGACATTTTTGATTTATCCGGTGAGGCGCTGGGATCAGTCGATGCGATC
Otu00625	Proteobacteria	Pseudomonadaceae_unclassified	Pseudomonadaceae_unclassified	0.04	0	0	0	0.04	0	0	GCCTAGATCTGGCCTGGTTGGCGGGGCAGGGTTATCACGTCGTCGGTGTTGAGCTGGCGCAGCGTGCAGTGGAAGATTTCTTCGACGAGCATAAGCTGCTGCCGGAGGTCAGTGAGGTCGGCGCGCTCAGGCTGTATCGGGCTGGCGCTGTGGAAATCTACTGCGGTGATTTCTTTGCCCTGACGGCTCAGCAGCTTGCTGACTGCTCCGCACTG
Otu00629	Proteobacteria	Proteobacteria_unclassified	Proteobacteria_unclassified	0.02	0	0.08	0	0.08	0	0	CGCGTGATTCTGCCTGGTTGCTTGCCAACGGTTACCGTGTGGTGGGTGCGGAATTGAGCGAGCTCGCTATTGACGAGTTGTTTAAAGACCTCGGTGAGGAGCCCGAAATCGCCAAAGTGGGGAAGCTGGTTCGGTACAGCGCTAAAGACATCGACATGTTCGTGGGTGATATTTTTGATGTCACTGCTGAGCATCTTGGGTCTGTAAACGCAACT
Otu00631	Proteobacteria	Pseudomonadaceae_unclassified	Pseudomonadaceae_unclassified	0.04	0	0	0	0.02	0	0	GCCTGGACATGGCGTGGCTGGCCGCGCAAGGCCACGACGTGCTGGGGGTGGAGTTGTCCGAGCGGGCGGTGAAGGACTTTTTTTCCGAGCATGAGCGGGAGCCGCAGGTTTCGCAGCAGGGGGCCTTCACGGTCTACCGCAGCGAGGGCATCGAGTTGTGGTGTGGCGATTTCTTCGCACTGACCGCGGGTGACACGCGGGGCTGTGCGGGCCTA
Otu00633	Proteobacteria	Pseudomonadaceae_unclassified	Pseudomonadaceae_unclassified	0.04	0	0	0	0.09	0	0	GCCTGGATCTGGCCTGGTTGGCGGGGCAGGGTTATCACGTCGTCGGTGTTGAGCTGGCGCAGCGTGCAGTGGAAGATTTCTTCGACGAGCATAAGATGCTGCCGGAGGTCAGTGAGGTCGGCGCGCTCAGGCTGTATCGGGCTGGCGCTGTGGAAATCTACTGCGGTGATTTCTTCGCCCTGACGGCGCAGCAGCTTGCTGGCTGCTCCGCACTG
Otu00670	Proteobacteria	Aeromonas	Aeromonas_unclassified	0.02	0.03	0.01	0	0	0.01	0	CCCGCGACATGCTCTGGCTGAGCGGGCAGGGCCATCCGGTCGACGGGTTCGAGCTCTCGTCCGTCGCCATCAACAGCTTTTTCAGCGAGAACAAGCTGAGTGACACGGTGAGTGCCGAGGGGCCCTATCAGTGCCATCAGCACGACAGCCTGCGCATCTATGAGGGGGATTTTTTCGCCGCCCCCGAACTTGGCCGCCGCTATCGGCTGGCC
Otu00692	Proteobacteria	Aquaspirillum	sp_	0	0.03	0	0	0.01	0	0	GCCTCGACATGGGCTGGCTGGCGGCGCAAGGCCATCAGGTGGTGGGGGTGGAGCTTAGCCATCTGGCCATCCGGGCATTCTTTCGCGCGCTTCAGCTCAAGCCGCGCCGGCGTGTGGTGGGCGACTTTACCGTATGGGAAAGCGGCCCGTTCCAGCTGTGGTGCGGCGATTATTTTGCCTTGAGCCGCGAGCTGCTTGGGCCGATTGATGCCGTG
Otu00694	Proteobacteria	Pseudomonas	Pseudomonas_unclassified	0	0.02	0.01	0.01	0.01	0	0	CTCTCGATCTGCGCTGGCTGGCGGCCCAGGGGCTGCAGGTGCTGGGCGTTGAGCTGTCACGCAAGGCGATTGAGGATTTTTTTGCAGAGCAGGGTTTGCAGCCGCAGATTGAGGAGCAGGGTGCGTTCGTACGTTTTCGTGCGGAGGCCATTGAGCTCTGGTGTGGCGACTTCTTTGCCCTGACGGCCACCGATGTGGAGCAATGCCATCTGTTC
Otu00714	Bacteria_unclassified	Bacteria_unclassified	Bacteria_unclassified	0.04	0	0	0	0.01	0	0	GCGCCGACCTGGCCTGGCTGGTGGAACACGGCCACGACGTTGTCGGAGTCGACATCTCCGAACTCGCCGCCCGAGCCTTCGCTTCCGAACAGAAGATTTCCGTCACCGTTGTTCAGGAGCCGCCGTTTACGATTCTGCGCGGCAAACTCATTGAGTATCATGTCGGCGATTTCTTCAGCATCGAGCCGGGCCGGATCGGCCGCTTCGATCTGATC
Otu00721	Proteobacteria	Proteobacteria_unclassified	Proteobacteria_unclassified	0.02	0	0	0	0.22	0	0	CGCTCGACATGAACTGGCTCGCGGACCGCGGCCACCGTGTCGTAGGAAGCGAACTGAGCTCGATCGCCATCCATGATTTCTTCGCCGCCGGGGGCCTCGATGAGCACCATGCGGCCGAGGGCGATTACATCCGCCACACGGCCGGCGCGTTCGAGATCCTCGAGGGCGATGCGCTCGCGCTAACGCCGCAGGTGACAGGCCCGCTCGACGCGTTC
Otu00745	Proteobacteria	Proteobacteria_unclassified	Proteobacteria_unclassified	0	0	0.03	0	0.01	0	0	CCCTCGACATCCACTGGCTGCTGGGCAACGGCTACCGGGTCGTGGGGGCCGAGTTGAGCCAGTTCGCCGTAGAACAACTGTTCGCCGAACTGGGCGTCGAGCCCACGGTCTCCCGTTGCGGCCCCGTCGAGCGTTATGGCGCACCCGGCCTCGACGTCTTCGTCGGCGACATCTTCGAGGTTTCGGCCCAACTGCTGGGCGAAGTCGACGCCATC
Otu00747	Proteobacteria	Proteobacteria_unclassified	Proteobacteria_unclassified	0	0.06	0	0	0.03	0.01	0	CGCGCGATATCTGGTGGCTGCTGGAATCCGGCTATCGGGTGGTCGGCGTTGAGTTGAGCCGGATGGCCGTCGATCAGCTGTTTGCGGAGATGGATCTGCAACCGGCCATTTCCCAGGCCGGCCCGCTGACCCGTTTTGCCGTTGAAGATGTCGACATCTACTGTGGCGATATCTTCGAACTGACCGACAGCGAGCTGGGCCAGATCGACGCGATC
Otu00779	Bacteria_unclassified	Bacteria_unclassified	Bacteria_unclassified	0	0.06	0	0	0	0.01	0	CGCGCGATATCTGGTGGTTGCTGGAATCCGGCTATCGGGTGGTCGGCGTTGAGTTGAGCCGGATGGCCGTCGATCAGCTATTTGCAGAGATGGATCTGCAACCAGCGATTTCCCAGGCCGGTCCGCTGACCCGCGTTGCCGTCGAAGATGTCGACATCTACTGTGGCGATATCTTCGAACTGACCGGCAGTGAGCTTGGCCCGATCGACGCGATC
Otu00800	Proteobacteria	Pseudomonas	putida	0	0.03	0	0	0.01	0	0	GTCTGGATTTGTTGTGGCTTGCACGCGAAGGCCATGAGGTTTTGGGTGTTGAACTCTCGGAAAAGGCCATTGAGGATTTCTTCAATGAGCATCAGCTTGATCCTGACGTCAGTGAGCAAGGGCCCTTCAAGGTCTACCGCGCAGGTTCTATCGAATTGTGGTGCGGTGATTTCTTCGAGTTGACCGCTGGGGATGTTGCCGACTGCAGCGCTCTG
Otu00878	Proteobacteria	Xanthomonas	axonopodis/campestris	0.02	0	0	0	0	0	0.04	CGCTGGACCTGCATTGGCTGGCCGCGCAAGGCCACCGCGTGCTCGGTGTGGAGATATCGCCATTGGCCGTCACGCAATTCTTCGATGACGCAGGCCTGCAACCGCAGCGACACACCAGCCGCGCAGGCGAGCACTGTATCGCCGGCCCGATCGAAATCATCTGCGGCGACGCCTTTACGCTGGATGCGAGCGTGCTGGGCGACTGCACCGCCGTC
Otu00904	Proteobacteria	Pseudomonas	Pseudomonas_unclassified	0.02	0	0.02	0	0.01	0.01	0	GCCTGGACCTGGCCTGGTTGGCGGGGCAGGGCTATCAAGTGGTGGGTGTCGAGCTGGCGCAGCGTGCGGTGGAGGACTTCTTCGCTGAGCATAAGCTGCAGCCGGAGGTCAGCGAGGTGGGCGCGTTCAGGCTGTATCGGGCTGGCGCTGTGGAGATCTACTGCGGTGATTTCTTTGCCCTGACGGCGCAACAGCTTGCCGGCTGCACTGCGCTG
Otu00909	Proteobacteria	Proteobacteria_unclassified	Proteobacteria_unclassified	0.02	0	0	0	0.03	0	0	GTCTCGACCTGGGCTGGCTGGTCGCCCAGGGCCACAGCGTGGTCGGTGTGGAGTTGTCGGTGCGCGCGGTGGAGGATTTCTTCCATGAGCAGCAGGTGCAGCCACAGATCGAGCAACTGGACGGATTCGTGCGCTACCAGGGCGCGGGCGTGGAGGTACTGTGCGGCGACTTCTTCGCGCTGACCGCGGCGCACCTGGGACATTGCGCTGCCTTG
Otu00933	Proteobacteria	Proteobacteria_unclassified	Proteobacteria_unclassified	0	0	0	0	0	0.42	0	GCCTGGACATGCACTGGCTGGCGGCGCAAGGCCATCGCGTGCTCGGGGTCGAGCTGTCGCCTTTGGCCGTGCAGCAGTTCTTCGACGAAGCCGGTCTGCAGCCCCGACAACACCACAGCCGCCACGGCGAACATTTCGTCGCCGGGCCGGTGGAAATCATCCAGGGCGATGCCTTCGGCCTGGATGCGGAACTGTTGGCCGATGTCGCGGGCATC
Otu00969	Bacteria_unclassified	Bacteria_unclassified	Bacteria_unclassified	0.02	0	0	0	0.02	0	0	CGCGGGATATCGCCTGGTTACTGGAGCGAGGTTATCGCGTCGTCGGCACGGAATTGAGCGCGCTCGCTATCAATGAGTTGTTCGGGGAACTTGGGCTGGCGCCTGTGATTGCCAATGTCGGTGACCTGACCCGCTACCACGCCAGCGGCATCGATATTTTCGTGGGCGACATCTTTGCTGTGTCCGCTGGTGAGCTTGGGCAGGTAGATGCCATC
Otu01041	Bacteria_unclassified	Bacteria_unclassified	Bacteria_unclassified	0.02	0	0	0	0.04	0	0	CGCTGGATATCGCGTGGCTGTTGTCTCATGGTTATCGTGTGGCCGGCGCGGAGTTAAGCGAATTGGCCATTGGACAATTATTTGCAGGGCTCGGGTTAAAGCCGAACATATCTAACGCCGGGAAGGTCCATCGCTATAGCGCAAAGAATATCGACATATTCGCCGGCAATATCTTTGATGTGTCCGAAGAAATCCTTGGAAAAGTGGATGCGGTC
Otu01054*	Proteobacteria	Proteobacteria_unclassified	Proteobacteria_unclassified	0	0	0.08	0	0	0.01	0	GCCTCGATATGGTGTGGCTGGCGGGGCAGGGACACGAAGTTGTCGGCGCCGAGCTTTCGGATGTGGCGCTGAAGGACTTCATCGCCGAACAGTACCTTACCTACGTGACGACGGAAGAAGCGGACGGCTTCACGACCTATTCGTCGGGCCCGTTTGAACTGTGGTGCGGGGACTACTTTTCGTTGAAGAAGGACGAGGTCGCGGCTTCTGCCGCCTAT
Otu01070	Proteobacteria	Proteobacteria_unclassified	Proteobacteria_unclassified	0	0	0.07	0	0.04	0	0	CGCTGGATATCGACTGGCTGCTGTCCCGCGGCCATCCCGTGGCCGGCGCAGAGCTCAGTTCGCTGGCCGTCGCACAACTGTTCGCGCGCCTTGGCGTGACGCCTGCCGTGCGGCGGGTCGGCGCGCTGGAATGCCACAGCGCTGCGGGGCTTGATGTGTTCGTTGGCGATATCTTCGACCTGACTGCCGAAGCACTGGGCGCCGTGGATGCCATC
Otu01098	Proteobacteria	Proteobacteria_unclassified	Proteobacteria_unclassified	0	0.01	0.04	0	0	0	0.06	GCCTCGACATGGTGTGGCTGGCCCAGCAAGGGCACCACGTCATTGGCGCGGAGTTGAGCGAAATCGCCGTCGACGGTTTCTTTGCCGAGTGCGGCCTTGAGCCGACGACGCGCAACGAAGGACCCTTCGTCGTAAAGTCGGCGGATCCCTACGAGCTGTGGTGCGGTGACATATTCGTACTACCCCACGAGGCCGTATCAAGCGTCGCCGGCGTC
Otu01119	Proteobacteria	Stenotrophomonas	acidaminiphila	0	0.01	0.06	0	0.01	0	0	GCCTGGACATGCATTGGCTGGCCGCGCAGGGCTACCGCGTGCTCGGCGTCGAGCTCTCGCCGCTGGCGGTGCAGCAGTTCTTCGACGAGGCCGGGCTGCGGCCCGAACGCCGCAGCAGCGCGCTGGGCGAGCATTTCAGCGCGGGACCGATCGAGATCCTCCTCGGCGACGCCTTCACCCTCGACGACCAGACCCTGGCCGGCATCGCCGGGCTC
Otu01131	Proteobacteria	Gp_CC8	Gp_CC8	0	0.04	0.01	0	0	0	0.01	GCCTCGATCTGGCCCATCTGGCGGACATGGGCTGCACGGTGGTCGGGGTTGAGCTGAGCGAACAGGCCATCGCGGCCTTCTTCGCCGAGCGCGGACTCGCGCCGCAGGTGACCGTGGAAGCGCGCTGCAGCCGCTGGGTCGCGGGTTCCTACATCTTGTTGCAAGGGGATTATTTCACGCTCACCGCGGCAGACCTGGGCGCGCCCTGCGCTGGG
Otu01186	Proteobacteria	Gammaproteobacteria_unclassified	Gammaproteobacteria_unclassified	0.02	0	0	0	0.01	0	0	GTCTGGATTTGATGTGGCTAGCAGGGCAGGGCTTACGAGTGCTTGGCGTGGAGCTGGTGGAGCAAGCGGTGGAAGACTTCTTTCGCGAGCAAAACCTGCAACCTGACATTCGTCAGCACGGCGTATTCCGTATCTACCAGGCCGGCAATGTAGAGCTGTGGTGCGGCGACATATTCGCCCTGACCGCTGACGACCTGCAGGGCTGCACCGCGCTC
Otu01188	Proteobacteria	Proteobacteria_unclassified	Proteobacteria_unclassified	0.02	0	0	0	0	0.01	0	GCATCGACATGGTCTGGCTGCTCAACCAGGGTTTTCACGTGGTGGGCGCGGAATTGTCTGAGATAGCGGTGGCGGGATTCTTCAGCGAGAACGGCCTGCAGCCGACGATCGAGGAGCGTGGCGCGCTCAAGCTTTATCGTGCGGAGGGCTGCGAGATCTGGTGCGGCGACTTCTTTGCCCTCAAGCCCGAAGACGTTGGCGACTGCACCGCATTC
Otu01210	Bacteria_unclassified	Bacteria_unclassified	Bacteria_unclassified	0	0	0.06	0	0.02	0	0	CGCTGGATATCCATTGGCTTCTTTCCAATGGCTATCGGGTAGTGGGAGCGGAGTTGAGCAAGCTTCCAGTCGAACAGCTATTTGCCGAGCTCGAGGCCGAACCTACGGTCTCGAACTGCGGCCTCACCCAGCGCTATCGCATATGCAATCTGGACGTCTTTGTCGGCGATATCTTCGACGTGTCGAGCCAGCTTCTTGGCCCCGTCGACGCCATC
Otu01217	Proteobacteria	Proteobacteria_unclassified	Proteobacteria_unclassified	0.01	0	0	0	0.06	0	0	CCCTCGACTTGACCTGGCTCGCGGACCGCGGCCACCGTGTCGTCGGCAGCGAACTGAGCTCGATCGCCATCCGTGATTTCTTCGCCGCCTGTGGCCTCGATGAGCACCAGGCGACCGAGGGCGATTACATCCGCCACACGGCCGGCGCGTTCGAGATCCTCGAGGGCGATGCGCTCGCGCTCACGCCGCAGCTGACAGGTTCGCTCGACGCGTTT
Otu01230	Proteobacteria	Proteobacteria_unclassified	Proteobacteria_unclassified	0	0	0	0	0.28	0	0	CGCGTGATGCTGCCTGGTTGCTGGCCCGCGGGTATCGCGTGGTTGGGGCTGAATTGAGCGAGATCGCCATTAATCATTTGTTTTCGGAACTCGGGGTGGAGCCAGCAGTCTCCCGGGCTGGGAAACTGACCCGCTACCGCGCCAAAGACATCGACATGCTGGTGGGCGACATTTTTGATGTCACTGCTGATATTCTTGCGGTAGTAGATGCGATA
Otu01264	Proteobacteria	Nitrosomonas	sp_	0	0.04	0	0	0.01	0	0	GCCGCGATATGCTTTGGCTCCATCAACAAGGACATACGGTTCTGGGTGTCGAATTAAGTATCGTTGCGGCACAGGCATTCTTTACAGAGAATGACCTGACACCTCAGTGCAGCGTGCATGATCCATTCACCCATTTGGAAGCAAATGACATACACATTTTGTGCGGTGATTTTTTTGATTTGCGTGAAAATGATATAGCAAAAGTCACTGCGGTC
Otu01292	Proteobacteria	Pseudomonas	Pseudomonas_unclassified	0.01	0	0.01	0	0.01	0	0	GCGTGGACATGGCCTGGCTGGCCAGCCTGGGTTATCGGGTGGTGGGCGTTGAGTTGGCGCGTCAGGCGGTCGAGGATTTCTTCCGCGAGCAGCAGTTGCAGCCGCAGATCACTGAGGAGGGCGCGTTCACGGTATACCGCGCCGGGGCTGTGGAGATCTATTGCGGTGATTTCTTTGCCCTGACGGCGCAGCAGTTGCAAGGTTGTCAGGCGCTG
Otu01345	Proteobacteria	Proteobacteria_unclassified	Proteobacteria_unclassified	0	0	0.06	0	0.01	0	0	GCCTCGACATGGTGTGGCTCGCAGGTCAGGGACACGAAGTCGTCGGCGCCGAACTTTCCGATATCGCGCTCAAGGATTTTATCGCCGAGCAGTACCTTACCTATGTGACGACGGAAGACGCGGACGGGTTCACGATTCATTCGTCTGGCCCATTCGAGCTGTGGTGCGGGGACTTCTTTGCCTTGAAGAAAGACGAGGTCTCAGTGCTTGCGGCCTAC
Otu01410	Proteobacteria	Proteobacteria_unclassified	Proteobacteria_unclassified	0.01	0	0	0	0.06	0	0	CCCTCGACTTGACCTGGCTCGCGGACCGCGGCCACCGTGTCGTCGGCAGCGAACTGAGCTCGATCGCCATCCGTGATTTCTTCGCCGCCGGTGGCCTCGATGAGCACCAGGCGACCGAGGGCGATTACATCCGCCACACGGCCGGCGCGTTCGAGATCCTCGAGGGCGATGCGCTCGCGCTCACGTCGCAGCTGACAGGTTCGCTCGACGCGTT
Otu01436	Proteobacteria	Proteobacteria_unclassified	Proteobacteria_unclassified	0	0	0.04	0	0.01	0	0	CACTGGATATCGGCTGGCTGCTGTCCCGTGGTCACCGGGTTGCTGGCGTGGAACTCAGTCCACTGGCGGTTGCGCAGCTGTTCGACCAGCTGGGCGTGAGGCCGGTTGTTTCGCGCGCGGATGGTGTTGAGCACCACAGTGCAGACAGAATCGATATCTTCGTCGGCGATATCTTCGACCTCTCGGCCAATGCGCTCGGATCTGTCGATGCGGTG
Otu01514	Proteobacteria	Pseudomonas	Pseudomonas_unclassified	0.01	0	0	0.1	0	0	0	GTCTGGATTTGATGTGGCTGGCGGGGCAGGGGTACCGCGTACTCGGCGTGGAGCTTGTCGAACAGGCCGTGCAGGATTTCTTCACTGAGCAGCAACTGCAACCACAGGTGCGCGCGCACGGCGTTTTTCGCATCTTTGAGGCCGGGAATGTGCAACTGTGGTGCGGCGATATCTTTGCACTGACTGCCGAGGATGTTGGTCACTGTACCGCGCTG
Otu01573	Proteobacteria	Gp_CH	Gp_CH	0	0.03	0	0	0	0	0.01	GCCTCGATATGGTCTGGCTGGCAGAGCAGGGGCATCAGGTCATCGGCGTTGAACTCAGCCCGGTTGCCGTAAAGGCATTCTTTGATGACAACGCATTGCCCGTCAGAAAGCACAGAGCGGGGCATTTCACGCACTGGAATAGCGGCCGGATCACCATTTTGTGCGGCGACTACTTCGCGCTGACAGCGGCTGACATCGGAATCATCGATGCCATC
Otu01624	Proteobacteria	Proteobacteria_unclassified	Proteobacteria_unclassified	0	0	0	0	0.19	0	0	CGCGTGACGCGGCCTGGTTGCTGGCACGCGGGTATCGCGTGGTTGGCGCCGAATTGAGCGAGATCGCCATTAATGATTTGTTTACGGAACTCGGGGTGGAGCCAGCAGTCTCCCGGGCTGGGAGACTGACCCGCTACCGCGCCAAAGACATCGACATTCTGGTGGGCGACATTTTTGATGTCACTGCTGAAATTCTTGAGCCGGTGGATGCGATC
Otu01671	Bacteria_unclassified	Bacteria_unclassified	Bacteria_unclassified	0.01	0	0.01	0	0.01	0	0	GTAAGGATCTGCGATGGCTCGCTGATCGCGGTCACACCGTTGTGGGTGTGGAACTTTCAGAACTCGCTGCGCGGGCTTTCGTCCGTGAGCAGGGAATTGCTTTCACTGAAGATCAAGACGGCACCTTTCTCCGGTTCAAGTCGGAGCGCATATCCATTCATGTCGGAGATTTCTTTGAGTTCATTCCGGCGAAGGCTGGAGAGTTCCCGTTGTTC
Otu01712	Proteobacteria	Proteobacteria_unclassified	Proteobacteria_unclassified	0	0	0.01	0	0.16	0	0	CGCTGGACATCGACTGGCTGTTGTCACTGGGCCACCGGGTGGTCGGTGTGGAACTCAGCGAGCTGGCGGTGACGCAGCTCTTCGAGCGCCTCGGCGTCGAGGCGGCGGTCGAGCGCGTGGGCGAATTGCGGAAGCACACCGCCGGGCGCCTCGAAGTATTCGTCGGCGACGTGTTCGCGCTCGACGCGGCAGCGCTCGGCCGCGTCGATGCCATT
Otu01800	Bacteria_unclassified	Bacteria_unclassified	Bacteria_unclassified	0	0	0.04	0	0.01	0	0	CGCGTGACGCTGCCTGGTTGCTGGCCCGCGGGTATCGTGTGGTTGGCGCCGAATTGAGCGAGATCGCCATTAGTGATTTGTTTACGGAACTCGGGTTGGAGCCAGCAGTCTCCCGGGCCGGGAGACTGACCCGCTACCGCGCCAAAGACATCGACATCCTGGTAGGCGACATTTTTGATGTCACTGCTGAAATTCTCGAGCCGGTAGACGCGATA
Otu01824	Proteobacteria	Proteobacteria_unclassified	Proteobacteria_unclassified	0	0	0	0	0.01	0	0	CGCGCGACATTGCCTGGCTGCTCGACGAAGGCTATCGCGTCACTGGCGCCGAGCTGAGTGAGCTGGCGATCAAGGCCTTGTTCGATGAGCTTGGTCTGGTTCCGGAGATTACCAACACCGACAAGCACGTGTGCTATCAGTCCAGGAATCTCCGCATCTTTGTCGGCGATATTTTTGATGTGTCTGCGAAGCAGCTCGGCCCGATCGACGCGATC
Otu01886	Proteobacteria	Gammaproteobacteria_unclassified	Gammaproteobacteria_unclassified	0	0	0.04	0	0	0	0.01	GCAAGGATATGCTGTGGCTGCTCACACAGGGATATGAAGTTATTGGTGTTGAACTCAGCCAACTAGCATTAGAGGCGTTTTTCACCGAGAACAGTTTGTCGGCAACGACAAACCAGCAGGGCAAATTCAGTGTGAGCGAAGCTGATGGTCTGCGCATTTATTGCGGTGATTTTTTCGACCTTACCGCCAACGATCTGGCTGGAGTAAGTGCAGTC
Otu01987	Proteobacteria	Proteobacteria_unclassified	Proteobacteria_unclassified	0	0	0	0.01	0	0	0	CGCGCGATATCTGGTGGCTGCTGGAATCCGGCTATCGGGTGGTCGGCATTGAGTTGAGCCGGATGGCCGTCGATCAGCTGTTTGCGGAGATGGATCTGCAACCGGCCATTTCCCAGGCCGGCCCGCTGACCCGTTTTGCCGTTGAAGATGTCGACATCTACTGTGGCGATATCTTCGAACTGACCGACAGCGAGCTGGGCCAGATCGACGCGATC
Otu02112	Proteobacteria	Proteobacteria_unclassified	Proteobacteria_unclassified	0.01	0	0	0	0.01	0	0	GCCTGGATATGGATTGGCTGCTCGGGCAGGGCCTGCAGGTCATCGGCGTCGAGCTGGTCGAACAGGCCGTGCGCGACTTCTTCGAGGAACGCCACCTGGTCCCGGAAATTGTCCAGCACAGGGACTTCCGGATTTATCGGGTCGACGCCCTGGAGATATGGTGCGGCGACTTCTTCGCCCTGACTCCCGCCGATGTCGTCACCTGCAAGGCCTTC
Otu02113	Bacteria_unclassified	Bacteria_unclassified	Bacteria_unclassified	0	0	0	0	0.01	0	0	CGCGAGACATTGCCTGGCTGCTCGACGAAGGCTATCGCGTCACTGGCGCCGAGCTGAGTGAGCTGGCGATCAAGGCCTTGTTCGAAGAGCTTGGTCTGGCGCCGGAGATTACCAACACCGACAAGCACGTGTGCTATCAGTCCAGGAATCTCCGCATCTTTGTCGGCGATATTTTTGATGTATCTGCGAAGCTGATCGGTCCAATCGACGCGATC
Otu02147	Proteobacteria	Proteobacteria_unclassified	Proteobacteria_unclassified	0	0	0	0.13	0	0	0	CCCTGGACATGACCTGGCTCGCTGACCGCGGCCACCGTGTCGTCGGCAGCGAACTGAGCTCGATCGCCATCCACGATTTCTTCGCGGCCGGTGGCCTCGACGAGCACCAGGCGGCCGAGGGCGATTACATCCGCCACGCGGCCGGCGCGTTCGAGGTCCTCGAGGGCGATGCGCTTGCGCTCACACCGCAGCTGACCGGCCCGCTCGACGCGTTC
Otu02188	Proteobacteria	Proteobacteria_unclassified	Proteobacteria_unclassified	0	0	0.03	0	0	0	0.01	GTAAGGATCTGCGATGGCTCGCTGATCGCGGTCACACCGTCGTGGGTGTGGAGCTTTCAGAACTCGCTGCGCGGGCTTTTGTCCGTGAGCAGGGAATTGCTTTCACTGAAGATCGAGACGGCGCCTTCCTCCGGTTCAAGTCGGAGCGCATATCCATTCATGTCGGAGATTTCTTTGAGTTCATTCCGGCGAAGGCTGGAGAGTTCCCGTTGTTC
Otu02270	Proteobacteria	Proteobacteria_unclassified	Proteobacteria_unclassified	0	0	0.01	0	0.06	0	0	CGCGGGATATCGCCTGGTTACTGGAGCGAGGTTATCGCGTCGTTGGCGCGGAATTGAGCGCGCTCGCTATCAATGAGTTGTTCGGGGACCTTGGGCTGGCGCCTGTGATTGCCAATGTCGGTGACCTGACCCGCTACCACGCCAGCGGCATTGATATTTTCGTGGGCGACATCTTTGCTGTGTCCGCAGGTGAGCTTGGGCAGGTAGACGCCATC
Otu02272	Bacteria_unclassified	Bacteria_unclassified	Bacteria_unclassified	0	0.01	0.01	0	0	0	0.01	CGCGAGACATTGCCTGGCTGCTCGATGAAGGCTATCGCGTCACTGGCGCCGAGCTGAGTGAGCTGGCGATCAAGGCCTTGTTCGAAGAGCTTGGTCTGGTGCCGGAGATTACCAACACCGACAAGCACGTGTGCTATCAGTCCAGGAATCTCCGCATCTTTGTCGGCGATATTTTTGATGTATCTGCGAAGCAGCTCGGCCCGATCGACGCGATC
Otu02327	Proteobacteria	Halomonas	Halomonas_unclassified	0	0	0	0	0.09	0	0	GCCTGGACATGCGCTGGCTGGCCGGCCATGACCATCCGGTGCTGGGCATCGAGCTGGCGCCGGAGGCGATCGAGCAGTTCGTGGCCGAGGGGCAGGGGGTGGTCACCCGCTATCATCAGGCGGGGTTCCAGATCTGCCGCCAGGCTAACGTGGAGCTGTGGCAGGGCGACTTCTTCCACTTTCACATCGAGCAGGCGGCGGAGATCGGGGCCTTC
Otu02394	Proteobacteria	Proteobacteria_unclassified	Proteobacteria_unclassified	0	0.01	0	0	0.02	0	0	CGCGCGATATCTGGTGGCTGCTGGAATCCGGCTATCGGGTGCTCGGCGTTGAGTTGAGCCGGATGGCCGTCGATCTGCTATTTGCAGAGATGGATCTGCAACCGGCCATTTCCCAGGCCGGTCCGCTGACCCGCTTTGCCGTCGAAGATGTCGACATCTACTGCGGCGATATCTTCGAACTGACCGGCCGCGAACTGGGCCAGATCGATGCGGTC
Otu02404	Proteobacteria	Pseudomonas	Pseudomonas_unclassified	0	0	0	0	0.01	0	0	CTCTCGATCTGCGCTGGCTGGCGGCCCAGGGGCTGCAGGTGCTGGGCGTTGAGTTGTCACGCAAGGCAATTGAGGATTTTTTTGCAGAGCAGGGATTGCAGCCGCAGATTGAGGAGCAGGGGGCTTTCGTACGTTTTCGTGCGGAGGCCATTGAGCTCTGGTGTGGCGACTTCTTTGCCCTGACGGCCACCGATGTGGAGCAATGCCATCTGTTC
Otu02422	Proteobacteria	unknown	unknown	0	0.01	0	0	0.01	0	0	GCCTGGACATGGTGTGGCTCGCGGTGCGCGGCCATGCAGTGGCCGGCAGCGAGCTCAGCGACGTCGCCGTGCGGGACTTCTTCGGCGAGCAGCGCATCCCCGTCGACGTACGCCCGCACGGCCCGTTTCGGCGGCACGCCGCCGGGGCGTTCGAGATCCTCGAAGGGGACGCGCTCGCCCTGACCCCAGCCCTGCTGGGCAAGGTACACGCCGCA
Otu02561	Proteobacteria	Pseudomonas	sp_	0	0.01	0	0.02	0	0	0	CGCTGGATATGGCCTGGCTGGCGGGCCAGGGCTATCGGGTGCTGGGCGTTGAGCTGGCGGAAAGTGCGGTGATCGCGTTTTTTGCCGAGCAGGAGCTGACCCCGGAGGTGGATCAGTACGGCGCTTTTCGCCGTTATCAGGCCGGCGCCGTCGAGCTGTTGTGTGGCGATTTTTTTGCGCTACAAGCTGCCGATGTGGCGGATTGTGCTGGCCTG
Otu02640	Proteobacteria	Proteobacteria_unclassified	Proteobacteria_unclassified	0	0	0.02	0	0.01	0	0	GCCTGGACATCGCCTGGTTGCTCTCTCGGGGCTATCCAGTAGCCGGCGCAGAACTTGTCCAAACGGCGGTAGAGGAGCTATTTCAGGGGCTCGGCATCAAACCGCAAATTGAAAAACGCGGTCCGCTCTTCCTCTACCACGCGCCTGGAATTCATATCTTCGTCGGGGATATTTTCGCGCTGACCCCAAATGAGTTGGGGCTCGTCGATGCCGTT
Otu02785	Proteobacteria	Proteobacteria_unclassified	Proteobacteria_unclassified	0	0	0.01	0	0.03	0	0	CGCGTGATGCTGCCTGGCTGCTTGCCAACGGTTATCGTGTAGTGGGTGCGGAATTGAGCGAGCTCGCTATTGACGAGTTGTTTAAAGACCTCGGTGAGGAGCCCGAAATCGCCAAAGTGGGGAAGCTGGTTCGGTACAGCGCTAAAGACATCGACATGTTCGTGGGTGATATTTTTGATGTCACTGCTGAGCATCTTGGGTCTGTAAACGCAACT
Otu02791	Proteobacteria	Proteobacteria_unclassified	Proteobacteria_unclassified	0	0	0.01	0	0.04	0	0	GCCTCGACATGCAGTGGCTGGCCGAACATGGGCATACCGTCGTCGGTGCCGAGCTGAGCGAGCAGGCAGTCGATGAATTTTTCGCCGAGCGCGAGCTGGTCCCGAGCGTCCGCCACATAGCGAACTTCACCGTCAAGTCATCGGGTCCATACGAGATCTGGGTCGGCGATTTCTTCGCGCTGCCCGAGTCGGCGGTCGCCGATGTCGCCGGGGTC
Otu02887	Proteobacteria	Proteobacteria_unclassified	Proteobacteria_unclassified	0	0	0	0	0.06	0	0	GCCTCGACATGCGTTGGCTCCTCGACCAAGGGCACGAGGTGGTGGGCGCGGAGCTCAGCCCCATCGCGTGCCGCGATTTCTTCGACGAGAACAAATTGCCCTGTACCGAAGAGGCGCGGGGTTCCTTCGTGGTCTACCGCGGCGAGCGAGTGACGCTGTGGTGTGGCGACGTGTTCCAGCTGCCGCCGGAAGCGACCGAGCGCTGTACCTTCCTC
Otu02937	Proteobacteria	Proteobacteria_unclassified	Proteobacteria_unclassified	0	0	0	0	0.01	0	0	GCCTCGACATGGTCTGGCTGGCGGGGCAGGGACACGAAGTTGTTGGCGCCGAGCTTTCGGATGTGGCGCTGAAGGACTTCATCGCCGAACAGTACCTTACCTACGTGACGACGGAAGAAGCGGCCGGCTTCACGACCTATTCGTCGGGCCCGTTTGAACTGTGGTGCGGGGACTACTTTTCGTTGAAGAAGGACGAGGTCGCGGCTCAGGCCGCCTA
Otu03114	Proteobacteria	Proteobacteria_unclassified	Proteobacteria_unclassified	0	0.01	0	0	0.01	0	0	CGCGCGATATCTGGTGGCTGCTGGAGTCCGGCTATCGGGTGGTCGGCGTTGAGTTGAGCCGGATGGCCGTCGATCAGCTATTTGCGGAGATGGATCTGCAACCGGCCATTTCCCAGGCCGGCCCGCTGACCCGCTTTGCCGTTGAAGATATCGACATCTACTGCGGCGATATCTTCGAACTGACCGACAGCGAGCTGGGGCCGATCGACGCGATC
Otu03371	Proteobacteria	Proteobacteria_unclassified	Proteobacteria_unclassified	0	0	0.01	0	0	0.01	0	CGCTGGACATGATCTGGCTCGCGGTGCGCGGGCATCGGGTTGTCGGCAGCGAGTTGAGCCCGATCGCCGTGCAGGAATTTTTTGGCGAGCAGAAAGCCCAGGCCGGCATCGAGATGCACGGCCCGTTCAAACGTCACGCTGCCAATGCGTTTGAGATCCTGGAAGGCGATGCATTCGAACTTTCGCCCGAGTTGCTTGGGCCGGTGCAGGCTGCT
Otu03434	Proteobacteria	Gp_CH	Gp_CH	0	0	0	0	0.01	0	0	GCCTCGATATGGTCTGGCTGGCAGAGCAGGGGCATCAGGTCATCGGCGTTGAACTCAGCCCGGTCGCCGTAAAGGCATTTTTTGATGACAACGCACTGCCCGTCACAAAGCACAGAGCGGGAAATTTCACGCACTGGAAAAGCGGCCGGATCACCATTTTATGCGGCGACTACTTCGCGCTGACAGCGGACGACATCGGAACCATCGATGCCATC
Otu03453	Proteobacteria	Pseudomonas	Pseudomonas_unclassified	0	0	0	0	0	0	0.05	GTCTGGACCTGCTGTGGCTGGCAGGGCAGGGGCACCCGGTGCTTGGGATTGAAATTTCACAAACGGCTGTCGAAGACTTCTTCAGCGAGCAGAAGTTAACGCCAGAAGTGAGTGATGTGGGCGCGTTCAGGGTCTATCGTGCCGGGGCCATCGAGCTGTGGTGTGGCGATTTTTTTGCGCTGGCAGCACGGGATGTGGCTGATTGTGTTGCGCTG
Otu03479	Proteobacteria	Aeromonas	Aeromonas_unclassified	0	0.01	0	0	0.01	0	0	CCCGCGACCTGCTCTGGCTGAGTGGTCAGGGGCATCCGGTGGATGGCTTCGAGCTCTCCGAGCTCGCCATTACCCAGTTTTTTGACGAGAACAATCTGAGTGCAGAGACAAGCGAGGTGGGCCCCTATCGGTGCCACCGGCACGACGACCTGCGCATCTATCAGGGGGATTTCTTCGCTGCCCCCGAGCTTGGCCGCCGCTACCGGCTCGCC
Otu03488	Proteobacteria	Pseudomonas	Pseudomonas_unclassified	0	0	0.01	0	0.01	0	0	CTCTCGATCTGCGCTGGCTGGTGGCCCAGGAGCTGCAGGTGCTGGGCGTTGAGCTGTCACGCAAGGCGATTGAGGACTTCTTTGCAGAGCAGGGTTTGCAGCCGCAGATTGAAGAACAGGGTGCTTTCGTACGTTTTCATGCTGATGCCATTGAACTCTGGTGCGGAGATTTCTTTGCCCTGACGGCCGCCGATGTGGAGCAATGCCATCTGTTC
Otu03540	Proteobacteria	Proteobacteria_unclassified	Proteobacteria_unclassified	0	0	0.01	0	0.03	0	0	CTCTCGACATCGACTGGCTGCTTGAGCGCGGCCATCGAGTAGTGGGTGTGGAGCTCAGTGGGCTGGCCGTGTCGCAGATCTTCGAGCGCCTGGGTGCTGCGCCTGCGATGGAATGCATCGGCGGCTTCGAGCGCCACAGAGCCACGGGTGTGGACATTTTCACTGGGGACTTCCTGCAGCTCGACGCAGAAATGCTGGGCACTGTGGATGCGGTG
Otu03542	Proteobacteria	Gammaproteobacteria_unclassified	Gammaproteobacteria_unclassified	0	0	0	0	0	0	0.03	GTCTGGACCTGGTCTGGCTGGCTGCGCAGGGGCATCAGGTACTTGGTGTGGAGCTTTCCCAGCTTGCCATCGAGCAGTTTTTTTCCGAGCAGCAGTTGCAGCCACAGATCAGTCAGCGGGGCGCCTTCAAGGTCTATCGCCACGATAACCTGGAGCTGTGGTGCGGTGATTTCTTCGCCCTTGGCCGTGAGGATATCGGTGACTGCACCGGGCTG
Otu03721	Gp_DC1	Gp_DC1	Gp_DC1	0	0	0	0	0.06	0	0	CCCTGGATATCGACTGGCTGCTGTCCCGCGGTTATCGCGTGACTGGCGCAGAGCTGAGTTCGCTGGCAGTTGCACAACTGTTCGAGCGGCTCGCTCTCACGCCGGAAGTCCGGCATGCCGGCGCGCTGGAATGCTGGAGTGCGTCGGGGCTGGACGTTTTCGTGGGCGATATCTTCCAGCTGTCTGCCGCAGCGCTGGGTGGTGTTGATGCGGTG
Otu04178	Proteobacteria	Pseudomonas	extremaustralis	0	0.01	0	0	0.01	0	0	GCCTGGACCTTATGTGGCTAGCCAGTCATGGCTTTCAGGTAATGGGCGTGGAGCTGTCGGAGCAGGCGGTCGAGGCCTTCTTCAGTGAACAGAACCTGACGCCGCGTATCAGCAGCCAAGGCGCGTTCAAGGTGTATCGGGCCGACGGGATCGAGATATGGTGCGGCGACTTCTTCGCTCTCGACGCTGATGCCTTGGCCGATTGCCATGCGTTT
Otu04233	Proteobacteria	Proteobacteria_unclassified	Proteobacteria_unclassified	0	0	0	0	0.04	0	0	CGCGCGATATCTGGTGGCTGCTGGAATCCGGCTATCGGGTCGCCGGTGCCGAGTTGAGCCGGGTTGCAGTCGAGCAGCTGTTTGCGGAGATGGATCTGCAACCGGCCATTTCCCAGTCCGGTCCGCTGACCCGCTTTGCCGTCGAAGATGTCGACATCTACTGCGGCGATATCTTCGAACTGACCAACAGTGAGCTTGGCCAGATCGACGCGATC
Otu04269	Proteobacteria	Pseudomonas	sp_	0	0	0	0	0.01	0	0	CGCTGGATATGGCCTGGTTGGCAGGTCAGGGTTATCGGGTGCTGGGCGTCGAGCTGGCGGAGAGTGCGGTGATCGCATTCTTTGCCGAGCAGGAGCTGACCCCGGAAATCGATCAGTACGGCGCTTTTCGCCGTTATCGAACCGGCGGAGTCGAGCTGCTGTGTGGCGACTTCTTCGCGCTGCAAGCTGCCGATGTGGCGGATTGTGCCGGCCTG
Otu04314	Proteobacteria	Gammaproteobacteria_unclassified	Gammaproteobacteria_unclassified	0	0	0	0	0.03	0.01	0	GTCTGGACCTGCGCTGGCTGGTCGAGCAGGGCTACGCAGTGCTGGGTATAGAGTTGTCGCGCAAGGCTGTGGAGGACTTCTTTGCCGAGCAGGGGCTGCGTTGCACGGTGCAGCAGCAGGGCGAGTTCTTGTGTTTTCGCTCGGCCGGGCTGGAAGTCTGGTGCGGAGATTTTTTCGCTTTGCAGTCTGCAGATGTCGCAGATTGTCAGGGCCTT
Otu04325	Proteobacteria	Proteobacteria_unclassified	Proteobacteria_unclassified	0	0	0	0	0.03	0.01	0	GCCGTGACATGCTGTACCTCGCGAGCCTCGGGCATGAGGTGATCGGCTGCGAACTCTCGCCGCTCGCGGCAGAGGCGTTCTTCGCGGAGGCGGGCCTGCAGCCGGAACGCGAGGCCCACGGCGGCTTCGAACGCTGGCAGTCCAGCGACATCACGATCCTGGTCGGGGACTTCTTCGGTCTCACGCCCGCGGATGTCGGACACGTTACCGCGCTC
Otu04391	Proteobacteria	Proteobacteria_unclassified	Proteobacteria_unclassified	0	0	0	0	0.04	0	0	CACGTGATGCTGCCTGGTTGCTTGCCCGCGGCTATCGCGTGCTTGGTGCGGAGTTAAGCGAACTCGCCGTTGGCGAATTGTTTACAGAACTCGGGGTGGATCCAGCAATATCCCGGGCTGGGAAACTGACCCGCTACCGCGCCAAAGACATCGACATGCTGATGGGCGACATTTTTGATGTTACGTCTGAAATTCTCGAGCCGGTGGACGCGATA
Otu04400	Proteobacteria	Gammaproteobacteria_unclassified	Gammaproteobacteria_unclassified	0	0	0	0	0	0.01	0	CCATCGACATGCGCTGGCTCAACCAGCAGGGCTTGCATGTGGTCGGCGTCGAGCTGTCGGAAAAAGCCGTTCAAGACTTCTTCAGCGAGGGAGGCGTGGAGCCCAGAGTCGAAGTGCGGGGGCACTTCAAGGTCTACAGCGTTGAGGCGTGCGAGATCTGGTGCGGCGACTTCTTCGCGCTCAAAGCCAAGGACATCGGCAATTGCTCGGCTCTG
Otu04780	Proteobacteria	Proteobacteria_unclassified	Proteobacteria_unclassified	0	0	0	0	0.02	0	0	CGCGTGATGCTGCCTGGTTGCTTGCCAACGGTTATCGTGTAGTGGGTGCGGAATTGAGCGAGCTCGCTATTGACGAGTTGTTTAAAGACTTCGGTGAGGAGCCCGAAATCGCCAAAGTGGGGAAGCTGGTTCGGTACAGCGCTAAAGACATCGACATGTTCGTGGGTGATATTTTTGATGTCACTGCTGAGCATCTCGGGTCTGTAAACGCAACT
Otu04846	Proteobacteria	Proteobacteria_unclassified	Proteobacteria_unclassified	0	0	0	0	0.03	0	0	CACGGGACATTGCCTGGCTGCTGGATCAGGGTTATCGCGTCGCCGGTGCTGAACTGAGTCAGATCGCCATCAATGATCTATTCAGTGAACTCGGGCTGCAACCTGATATCACCACTGTCGGGTCCATGACGCATTACCACTCCCCCAATCTGGACATATTCGTGGGCGACATTTTTGATTTGTCCCGTGATGTGCTGGGTGCGGTGGATGCGGTC
Otu04962	Proteobacteria	Pseudomonas	Gp_BR	0	0	0	0	0.01	0	0	CTCTCGATCTGCGCTGGCTGGCGGCCCAGGGGCTGCAGGTGCTGGGCGTTGAGCTGTCACGCAAGGCGATTGAGGACTTCTTTGTGGAGCAGGGATTGCAACCGCAGATTGAAGAGCAGGGTGCGTTCGTGCATTTTCGTGCGGAGGCCATTGAACTCTGGTGTGGCGACTTCTTTGCCCTGACTGCCGCCGATGTGGAGCAATGCCATCTGTTC
Otu04967	Proteobacteria	Proteobacteria_unclassified	Proteobacteria_unclassified	0	0	0	0	0.01	0	0	CGCTCGACATGGCCTGGCTCGCGGACCGCGGCCACCGTGTCGTCGGCAGCGAACTGAGCTCGATCGCCATCCGTGATTTCTTCGCCGCCGCTGGCCTCGATGAGCAGCAGACGACCGAGGGCGATTACATCCGTCACACGGCCGGCGCGTTCGAGATCCTCGAGGGCGATGCGCTGGCGCTCACGCCGCAGCTGACGGGTTCGCTCGACGCATTC
Otu05106	Proteobacteria	Proteobacteria_unclassified	Proteobacteria_unclassified	0	0.01	0	0	0	0	0.01	CCGAAGACCTCGCCTTCCTCGCGTCGAAGGGCTTCGAGGTCATCGGCATCGAGCTGGTCGAAGACGCGGTGCGCGCGTTCTTCTCAGAGCACCAGCTCTCGCCCACCGTCGAGGCGCACGGCGCGGTGACCTCGTACCGCGCGCACGGCGTGCAGCTCTTCGCCGGAGACTTCTTCGCGGTGACGCCCGCGCTCACCGGCTCCGTCGACGCCTTC
Otu05187	Proteobacteria	Proteobacteria_unclassified	Proteobacteria_unclassified	0	0	0	0	0.03	0	0	CGCGTGATGCTGCCTGGTTGCTTGCCAACGGTTATCGTGTAGTGGGTGCGGAATTGAGCGAGCTCGCTATTGACGAGTTGTTTAAAGACCTCGGTGAGGAGCCCGAAATCGCCAAAGTGGGGAAGCTGGTTCGGTACAGCGCTAAGGACATCGACATGTTCGTGGGTGATATTTTTGATGTCACTGCTGAGCATCTTGGGTTTGTAAACGCAACT
Otu05628	Proteobacteria	Proteobacteria_unclassified	Proteobacteria_unclassified	0	0	0	0	0.01	0	0	CGCGTGACATCCTGTGGTTGTTGCAGGCCGGCTACCAGGTGGCCGGTGTGGAGCTGAGCGAGAGGGCGGTGCGCGAGTTGTTTGCCGACCTGGGCGTGACGCCACAGGTGTCGGCAGCTGGCAGCTTGCAGCGCTTCCACGCGCAGGGGCTGGATGTGTTCGTCGGCGATCTGTTTGATCTGTCGGCGGAGATCCTCGGCACCGTGGGCGCAGTG
Otu05643	Gp_DC1	Gp_DC1	Gp_DC1	0	0	0	0	0.02	0	0	CGCTGGATATCGACTGGCTGCTGTCTCGCGGTTATCGCGTGGCTGGCGCAGAGCTGAGTCCATTGGCGGTTGCGCAACTGTTCGAGCGGCTCGGTGTTACGCCACAGGTTCGGCGTGCCGGCGCGCTGGAATGCTGGAGTGCTGCCGGGGTGGATGTATTCGTGGGCGATATCTTCAAGCTGTCTGCTGCAGAGCTCGGCGGCGTGGATGCCGTG
Otu05951	Proteobacteria	Proteobacteria_unclassified	Proteobacteria_unclassified	0	0	0	0	0.02	0	0	CGCGTGACGCGGCCTGGTTGCTGGCCCGTGGGTATCGCGTGGTTGGCGCCGAATTGAGCGAGATCGCCATTAATGATTTGTTTACGGAACTCGGGGTGGAGCCAGCAGTCTCCCGGGCTGGGAGACTGACCCGCTACCGCGCCAAAGACATCGACATTCTGGTGGGCGACATTTTTGATGTCACTGCTGAAATTCTCGAGCCGGTGGATGCGATC
Otu06465	Proteobacteria	Proteobacteria_unclassified	Proteobacteria_unclassified	0	0	0	0	0.02	0	0	GCCTCGATATGGTGTGGCTGGCGGGGCAGGGACACGAAGTTGTCGGCGCCGAGCTTTCGGATGTGGCGCTGAAGGACTTCATCGCCGAACAGTACCTTACCTACGCGACGACGGAAGAAGCGGACGGCTTCACGACCTATTCGTCGGGCCCGTTTGAACTGTGGTGCGGGGACTACTTTTCGTTGAAGAAGGACGAGGTCGCGGCTTCTGCCGCCTAT
Otu06778	Proteobacteria	Gammaproteobacteria_unclassified	Gammaproteobacteria_unclassified	0	0	0	0	0	0	0.02	GCCTGGACATGCACTGGCTCGCGGCGCAGGGGCACCGCGTACTTGGCGTCGAACTGTCGCCGCTGGCGGTGCGGCAGTTCTTCAGCGACGCCGGCCTGCAACCACGACGCCATCACAGCCGCTATGGGGAGCATTTTGTTGCAGGCCCTGTCGAGATCATCCTCGGCGATGCCTTCGGCCTGGACGTCGCGCTGCTCGGCGACGTGGCGGGCGTG
Otu06797	Proteobacteria	Proteobacteria_unclassified	Proteobacteria_unclassified	0	0	0	0	0.01	0	0	GCCTCGACATGGTGTGGCCCGCGGAGCGCGGGCACGCGATCGTCGGCAGCGAACTGAGTCCGATCGCGATCCGGGATTTCTTTGCGAGCCAGCGGCTCGAGCCATCGCGATCGGAGCACGGCGGCTTCGTCCGGCACGCCGCCGGCCCGTATACGATCCTCGAGGGTGACGCGCTCGCACTGACGACGGACCAGGCGGGGCCAATCGACGCGGTC
Otu07273	Bacteria_unclassified	Bacteria_unclassified	Bacteria_unclassified	0	0	0	0	0.01	0	0	CGCTCGATATCGCCTGGCTGCTGGCCCAGGGTTATCGCGTCGCGGGTGCAGAGCTGAGCGCGCTTGCAATTAACGAACTGTTCAGGGAACTGGGTGCGGTTCCACACATCGTTGCAGCCGGGGCGCTGACGCACTATAGCGCCAGCGATATCGACATCTTTGTGGGTGATGTTTTCGATCTGTCTGCCCATCGTCTTGGGTCTGTAGACGCGATC
Otu07547	Proteobacteria	Proteobacteria_unclassified	Proteobacteria_unclassified	0	0	0	0	0	0.01	0	CGCGTGATGCCGCCTGGTTACTGGCCCGCGGGTATCGCGTGGTTGGCGCGGAATTGAGCGAACTCGCCATTAGCGAGTTGTTTGCGGAACTCGCCGTGGAGCCGAAAATCGCCAAGGTTGGGGCATTGGTTCGCTACAGCGCTAAAGACATCGACATAGTCGTGGGGGATATTTTTGCTGTGACCGCTGACTGCCTTGGGCCCGTAGACGCGATA
Otu07604	Proteobacteria	Proteobacteria_unclassified	Proteobacteria_unclassified	0	0	0	0	0.01	0	0	CCCGCGACATTCACTGGCTGCTGGCGCAAGGCTTCCGTGTGGCGGGCGCGGAACTCAGCGAGATCGCCGTCACACAACTCTTCGCCGAACTCGGCGTGGAGCCGCGCAGAACCGCAGAAGGCGGGCTTACGCGTTACAGCGCCCATAACATCGACGTCTTTCAGGGCGACATCTTTGCGCTGCGCACCCCGATACTGGGGCCGGTAGATGCAATC
Otu08015	Proteobacteria	Proteobacteria_unclassified	Proteobacteria_unclassified	0	0	0	0	0	0.01	0	CCCGCGATATTGCCTGGCTGCTGGATGCCGGGTATCAGGTTGCCGGTGCAGAATTGAACGAGCAGGCGGTGAAGCAGCTTTTTGCAGAGCTGGATGCGGTACCGGACGTCATTGAGCACGCAACATTGAAGCAGTACCGTAGCGAATGCATTGATATATTTGTTGGCGATATTTTTGATCTATCGGCAGATTTTCTCGGAAGTGTGGGCGGTATT
Otu08127	Proteobacteria	Proteobacteria_unclassified	Proteobacteria_unclassified	0	0	0	0	0.01	0	0	GCCTCGACATGGTCTGGCTGGCGGGGCAGGGACACGAAGTTGTTGGCGCCGAGCTTTCGGATGTGGCGCTGAAGGACTTCATCGCCGAACAGTACCTTACCTACGTGACGACGGAAGAAGCGGCCGGCTTCACGACCTATTCGTCGGGCCCGTTTGAACTGTGGTGCGGGGACTACTTTTCGTTGAAGAAGGACGAGGTCGCGGCTTCTGCCGCCTAT
Otu08136	Gp_DC1	Gp_DC1	Gp_DC1	0	0	0	0	0.01	0	0	CCCTGGATATCGACTGGCTGCTGTCTCGCGGGTATCGCGTGGCTGGCGCGGAGCTGAGTCCACTGGCGGTGGCCCAGCTATTCGAGCGGCTCGGCGCTGCGCCAGAGGTTCGGAGTGCCGGAGCAATGCAATGCTGGAGTGCGGCCGGGATCGATGTATTCGTGGGCGATATCTTCCGATTGTCTGCCACTGGGCTGGGCGGCGTGGATGCCGTG
Otu08802	Proteobacteria	Pseudomonas	Pseudomonas_unclassified	0	0	0	0.01	0	0	0	GCCTGGACCTGATGTGGTTGGCCAGTCATGGGCTGCGGGTGATGGGGGTGGAGCTGTCGGAGCAGGCCGTGGAGGCGTTTTTCAGCGAACAGAACCTTGTGCCACGTATCACTCGGCGGGATGCCTTTACGGCGTACCAGACTGATCTGATCGAAGTGTGGTGCGGCGACTTCTTCGCTCTGGACGCCGAAGCCTTGGCCGGTTGCACCGCATTA
Otu08886	Proteobacteria	Proteobacteria_unclassified	Proteobacteria_unclassified	0	0	0	0	0.01	0	0	CACGTGATGCCGCCTGGTTGCTGGCCCGCGGTTATCGCGTGGTTGGGGCGGAATTGAGCGAACTCGCCATCAGCGAGTTGTTTACTGAACTCGGGGTGGAGCCAGCAATCGCTAGGGTTAGGACATTGGTTCGCTACAGTGCCAGAGACATCGACATATTCGTGGGTGATATTTTTGATGTGACTGCCGGCTGTCTTGGAAACGTAAACGCGATA
Otu10055	Proteobacteria	Proteobacteria_unclassified	Proteobacteria_unclassified	0	0	0	0	0	0.01	0	CGTACGACTTGGTCTACCTGGCCCAGCGCGGGCATCAGGTGGTCGGGGTGGAGCTGTCCGAGCTGGCCGCTCGCGCGTTTTTTGCCGAACAGAAGCTGGCGGTCCTGGAGGCGGAACACGGGGATTTCCTGCGACTCTCCGCGCGCGACGTGACCATCTTCGTCGGCGACTTCTTTGCGACGACCCCCGAGTTGATCGGTCCTTGCACGGCCTTC
Otu10056	Proteobacteria	Proteobacteria_unclassified	Proteobacteria_unclassified	0	0	0	0	0.01	0	0	GTCTGGACATGCTGTGGCTGAGAGAACAGGGATGTTCGGTGCTCGGTGTTGAACTGAGTCAGCTCGCTGTGCAGGCGTTTTTCGACGAAAACGGCTACGCGCCTTGCTGTTCGTTGGACGAGAGATACGAGACTTTTGAAGCCGATAACATGCGCATTCTGTGCGGCGATTTTTTCGATCTGAAACGGGAAGATTTGAAAAGCGTGAAACTGGTC
Otu10066	Proteobacteria	Pseudomonas	stutzeri	0	0	0	0	0	0	0.01	GCCTGGACCTGGCCTGGCTCGCAGGGCAGGGCCATCGCGTACTGGGGGTGGAGCTGAGCCAGAAAGCTGTCGAGGCGTTTTTCGCCGAGCAAGGTCTGGAGGCGGAGATTTCGCAGGTCGGCGCATTCAAAGTCTATCGATCCGGCAGGCTTGAGATCCGTTGTGGCGATTTCTTTGCGCTGGCAGCGCAAGACGTTGCCGACTGCCGGGGCGTT
Otu10094	Proteobacteria	Proteobacteria_unclassified	Proteobacteria_unclassified	0	0	0	0	0	0.01	0	CCCGTGATATCGCGTGGTTGCTGCAAAATGGCTACCGCGTTGCCGGGGCCGAATTGAGTGAACTGGCCGTGCAGCAATTGTTCGCCGAGCTTGGTGTGCAGCCAACACTCACAACAGTGCAGGGTGGTTTGCAACACTATCGTGCGCCTGGCCTCGATATTTTTGCCGGGGACATTTTTGCGTTAACCCCTGCCTTGTTGGGTCAGGTGGATACCACC
Otu10095	Proteobacteria	Proteobacteria_unclassified	Proteobacteria_unclassified	0	0	0	0	0.01	0	0	GCCTCGACATGGTTTGGCTTGCGGAACAGGGCTACGAAGTTGTGGGCGTCGAACTCTCCGAAATCGCCATCAAGGATTTCGTTGCCGAGCAGATGTTGAAATACGTCGAAGTCGCGCAGGTCGATGGGTTCAACGTCCATGCATCGGACCGGCTTGAACTCTGGTGCGGTGACTTTTTCGCTCTGACGCCCGAACAGGCGAACGTGACCGCCGCCTAC
Otu11647	Bacteria_unclassified	Bacteria_unclassified	Bacteria_unclassified	0	0	0	0	0	0.01	0	CCCTCGACATCCACTGGCTGCTGGGCAACGGCTACCGGGTCGTGGGAGCCGAGCTGAGCCAACTCGCCGTCGAACAACTGTTCGCCGAGCTGGGCGCCGAACCCAAGGTCTCCCGCAGCGGCCCGATCGAGCGTTATGGCGCACCCGGTCTCGACGTCTTCGTCGGCGACATCTTCGAGGTTTCGGCCCAACTGCTGGGCCAAGTCGACGCCATC
*: detected among the blank samples shown in Table Sxx
