# Supplementary material for: Coalescence of bacterial groups originating from urban runoffs and artificial infiltration systems among aquifer microbiomes
Source: Copernicus journal article supplement (doi:10.5194/hess-24-4257-2020), 2020-08-31
Supplement: Supplementary file 1 [file hess-24-4257-2020-supplement.zip › hess-24-4257-2020-supplement-title-page.pdf]

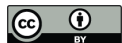

## *Supplement of*

# **Coalescence of bacterial groups originating from urban runoffs and artificial infiltration systems among aquifer microbiomes**

**Yannick Colin et al.**

*Correspondence to:* Yannick Colin ([yannick.colin@univ-rouen.fr](mailto:yannick.colin@univ-rouen.fr)) and Benoit Cournoyer ([benoit.cournoyer@vetagro-sup.fr](mailto:benoit.cournoyer@vetagro-sup.fr))

- [hess-24-4257-2020-supplement-title-page.pdf](#)
- Colin et al R2 hess-2020-39 Suppl\_Figures v4.docx
- Colin et al R2 hess-2020-39 Suppl\_Tables v3.xlsx

The copyright of individual parts of the supplement might differ from the CC BY 4.0 License.
